# Supplementary material
Source: PubMed Central journal article supplement (PMC5619958)
Supplement: ASN.2016101103SupplementaryData.pdf [file ASN.2016101103SupplementaryData.pdf]

## Supplement

**Supplemental Figure 1:** Hierarchical clustering using “Ward” averaging method based only on cell-type positive standard genes from mesangial cells or podocytes. Using mesangial cell positive standard genes the IgAN patient samples can be separated from the control group samples, while using podocyte positive standard genes yields overlapping results.

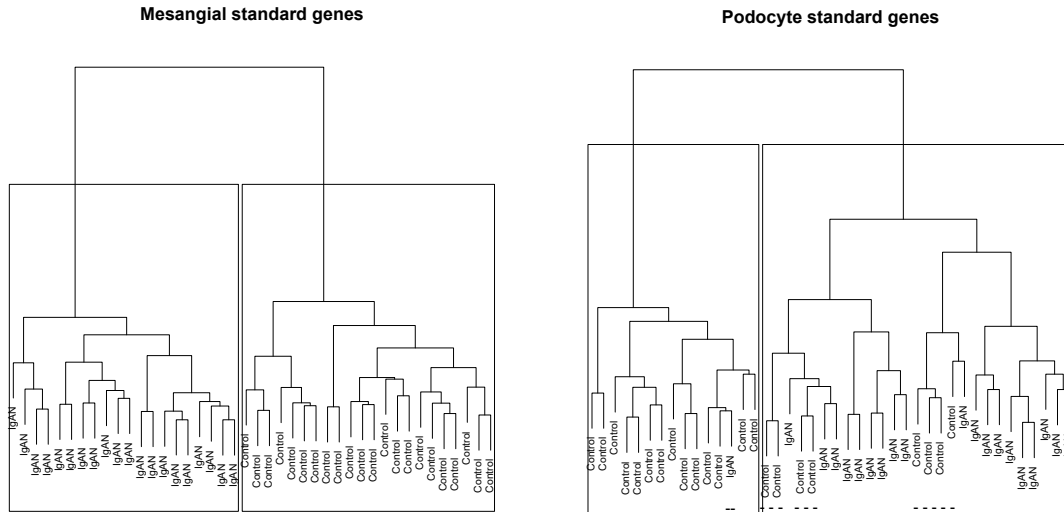

**Supplemental Figure 2:** ELISA showing the ratio of gd-IgA content in the serum of an IgAN patient compared to that of healthy control. Lectin *Helix Aspersa* was used to detect gd-IgA. The ratio of gd-IgA in patient serum is 1.32 compared to healthy control 0.83, indicating a much higher gd-IgA content in the IgAN patient.

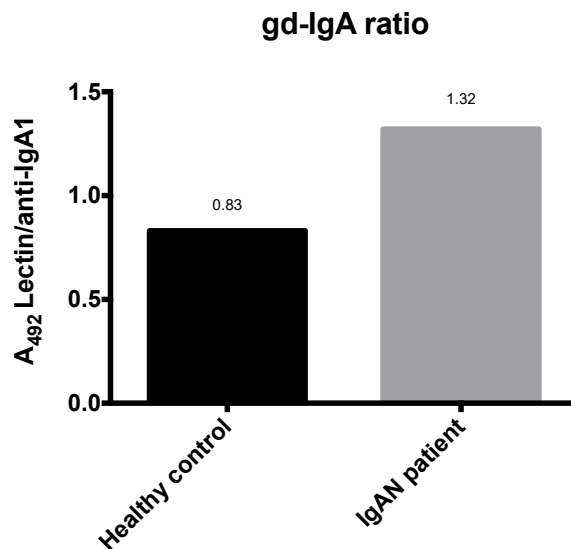

**Supplemental Figure 3:** Taqman® Q-PCR evaluation of microarray data. Bar graph represents confirmed expression of significantly regulated genes. Up and down regulation is also confirmed in agreement with the microarray data.

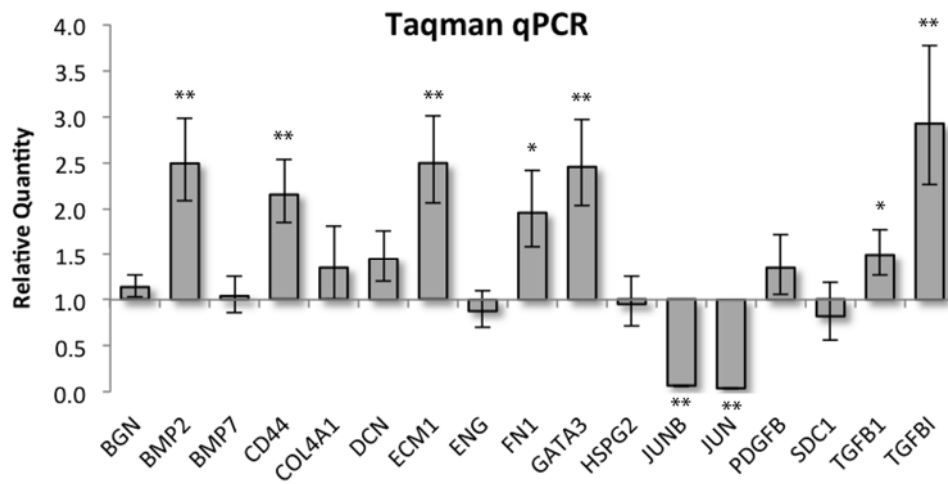

**Supplemental Table 1:** List of all significantly differentially expressed genes identified in microarray analysis. Genes are sorted according to q-values and fold change is considered up regulation if the q-value is >1.5 and down regulation if the q-value is <0.67.

| Entrez ID | Fold change (Unlogged) | Fold change (log2) | Q-value  | Symbol  | Description                                                                                                                 |
|-----------|------------------------|--------------------|----------|---------|-----------------------------------------------------------------------------------------------------------------------------|
| 3627      | 2.3914                 | 1.2579             | 0.00E+00 | CXCL10  | chemokine (C-X-C motif) ligand 10 [Source:HGNC Symbol;Acc:HGNC:10637]                                                       |
| 10516     | 1.9331                 | 0.9509             | 0.00E+00 | FBLN5   | fibulin 5 [Source:HGNC Symbol;Acc:HGNC:3602]                                                                                |
| 7097      | 1.5844                 | 0.6639             | 0.00E+00 | TLR2    | toll-like receptor 2 [Source:HGNC Symbol;Acc:HGNC:11848]                                                                    |
| 6039      | 1.6594                 | 0.7307             | 0.00E+00 | RNASE6  | ribonuclease, RNase A family, k6 [Source:HGNC Symbol;Acc:HGNC:10048]                                                        |
| 1043      | 1.5658                 | 0.6469             | 0.00E+00 | CD52    | CD52 molecule [Source:HGNC Symbol;Acc:HGNC:1804]                                                                            |
| 3043      | 1.9514                 | 0.9645             | 0.00E+00 | HBB     | hemoglobin, beta [Source:HGNC Symbol;Acc:HGNC:4827]                                                                         |
| 23015     | 1.5353                 | 0.6186             | 0.00E+00 | GOLGA8B | golgin A8 family, member B [Source:HGNC Symbol;Acc:HGNC:31973]                                                              |
| 221303    | 1.5654                 | 0.6465             | 0.00E+00 | FAM162B | family with sequence similarity 162, member B [Source:HGNC Symbol;Acc:HGNC:21549]                                           |
| 6351      | 2.4230                 | 1.2768             | 0.00E+00 | CCL4    | chemokine (C-C motif) ligand 4 [Source:HGNC Symbol;Acc:HGNC:10630]                                                          |
| 3394      | 1.6520                 | 0.7242             | 0.00E+00 | IRF8    | interferon regulatory factor 8 [Source:HGNC Symbol;Acc:HGNC:5358]                                                           |
| 4057      | 1.6081                 | 0.6854             | 0.00E+00 | LTF     | lactotransferrin [Source:HGNC Symbol;Acc:HGNC:6720]                                                                         |
| 1759      | 1.5543                 | 0.6363             | 0.00E+00 | DNM1    | dynamin 1 [Source:HGNC Symbol;Acc:HGNC:2972]                                                                                |
| 10288     | 1.7345                 | 0.7945             | 0.00E+00 | LILRB2  | leukocyte immunoglobulin-like receptor, subfamily B (with TM and ITIM domains), member 2 [Source:HGNC Symbol;Acc:HGNC:6606] |
| 4050      | 1.5094                 | 0.5940             | 0.00E+00 | LTB     | lymphotoxin beta (TNF superfamily, member 3) [Source:HGNC Symbol;Acc:HGNC:6711]                                             |
| 3620      | 2.1099                 | 1.0772             | 0.00E+00 | IDO1    | indoleamine 2,3-dioxygenase 1 [Source:HGNC Symbol;Acc:HGNC:6059]                                                            |
| 1520      | 1.5858                 | 0.6653             | 0.00E+00 | CTSS    | cathepsin S [Source:HGNC Symbol;Acc:HGNC:2545]                                                                              |
| 2162      | 1.8440                 | 0.8828             | 0.00E+00 | F13A1   | coagulation factor XIII, A1 polypeptide [Source:HGNC Symbol;Acc:HGNC:3531]                                                  |
| 2268      | 1.5315                 | 0.6150             | 0.00E+00 | FGR     | FGR proto-oncogene, Src family tyrosine kinase [Source:HGNC Symbol;Acc:HGNC:3697]                                           |
| 963       | 1.7540                 | 0.8107             | 0.00E+00 | CD53    | CD53 molecule [Source:HGNC Symbol;Acc:HGNC:1686]                                                                            |
| 3908      | 1.5794                 | 0.6593             | 0.00E+00 | LAMA2   | laminin, alpha 2 [Source:HGNC Symbol;Acc:HGNC:6482]                                                                         |
| 962       | 1.6889                 | 0.7561             | 0.00E+00 | CD48    | CD48 molecule [Source:HGNC Symbol;Acc:HGNC:1683]                                                                            |

|        |        |        |          |          |                                                                                                         |
|--------|--------|--------|----------|----------|---------------------------------------------------------------------------------------------------------|
| 9770   | 1.5077 | 0.5924 | 0.00E+00 | RASSF2   | Ras association (RalGDS/AF-6) domain family member 2 [Source:HGNC Symbol;Acc:HGNC:9883]                 |
| 6422   | 1.6381 | 0.7121 | 0.00E+00 | SFRP1    | secreted frizzled-related protein 1 [Source:HGNC Symbol;Acc:HGNC:10776]                                 |
| 348094 | 1.5023 | 0.5872 | 0.00E+00 | ANKDD1A  | ankyrin repeat and death domain containing 1A [Source:HGNC Symbol;Acc:HGNC:28002]                       |
| 3561   | 1.5313 | 0.6148 | 0.00E+00 | IL2RG    | interleukin 2 receptor, gamma [Source:HGNC Symbol;Acc:HGNC:6010]                                        |
| 4907   | 1.7807 | 0.8325 | 0.00E+00 | NT5E     | 5'-nucleotidase, ecto (CD73) [Source:HGNC Symbol;Acc:HGNC:8021]                                         |
| 3936   | 1.7666 | 0.8210 | 0.00E+00 | LCP1     | lymphocyte cytosolic protein 1 (L-plastin) [Source:HGNC Symbol;Acc:HGNC:6528]                           |
| 2687   | 1.5054 | 0.5901 | 0.00E+00 | GGT5     | gamma-glutamyltransferase 5 [Source:HGNC Symbol;Acc:HGNC:4260]                                          |
| 6876   | 1.7099 | 0.7739 | 0.00E+00 | TAGLN    | transgelin [Source:HGNC Symbol;Acc:HGNC:11553]                                                          |
| 3689   | 1.6183 | 0.6945 | 0.00E+00 | ITGB2    | integrin, beta 2 (complement component 3 receptor 3 and 4 subunit) [Source:HGNC Symbol;Acc:HGNC:6155]   |
| 7276   | 1.6219 | 0.6977 | 0.00E+00 | TTR      | transthyretin [Source:HGNC Symbol;Acc:HGNC:12405]                                                       |
| 10417  | 1.5646 | 0.6458 | 0.00E+00 | SPON2    | spondin 2, extracellular matrix protein [Source:HGNC Symbol;Acc:HGNC:11253]                             |
| 200316 | 1.5090 | 0.5936 | 0.00E+00 | APOBEC3F | apolipoprotein B mRNA editing enzyme, catalytic polypeptide-like 3F [Source:HGNC Symbol;Acc:HGNC:17356] |
| 4938   | 1.5206 | 0.6046 | 0.00E+00 | OAS1     | 2'-5'-oligoadenylate synthetase 1, 40/46kDa [Source:HGNC Symbol;Acc:HGNC:8086]                          |
| 9232   | 1.5753 | 0.6557 | 0.00E+00 | PTTG1    | pituitary tumor-transforming 1 [Source:HGNC Symbol;Acc:HGNC:9690]                                       |
| 140578 | 3.1165 | 1.6399 | 0.00E+00 | CHODL    | chondrolectin [Source:HGNC Symbol;Acc:HGNC:17807]                                                       |
| 11098  | 1.5355 | 0.6187 | 0.00E+00 | PRSS23   | protease, serine, 23 [Source:HGNC Symbol;Acc:HGNC:14370]                                                |
| 64231  | 1.9938 | 0.9955 | 0.00E+00 | MS4A6A   | membrane-spanning 4-domains, subfamily A, member 6A [Source:HGNC Symbol;Acc:HGNC:13375]                 |
| 3371   | 1.5718 | 0.6524 | 0.00E+00 | TNC      | tenascin C [Source:HGNC Symbol;Acc:HGNC:5318]                                                           |
| 51058  | 1.5211 | 0.6051 | 0.00E+00 | ZNF691   | zinc finger protein 691 [Source:HGNC Symbol;Acc:HGNC:28028]                                             |
| 30845  | 1.5549 | 0.6369 | 0.00E+00 | EHD3     | EH-domain containing 3 [Source:HGNC Symbol;Acc:HGNC:3244]                                               |
| 10201  | 1.5190 | 0.6031 | 0.00E+00 | NME6     | NME/NM23 nucleoside diphosphate kinase 6 [Source:HGNC Symbol;Acc:HGNC:20567]                            |

|        |        |        |          |         |                                                                                                           |
|--------|--------|--------|----------|---------|-----------------------------------------------------------------------------------------------------------|
| 6275   | 1.7170 | 0.7799 | 0.00E+00 | S100A4  | S100 calcium binding protein A4<br>[Source:HGNC<br>Symbol;Acc:HGNC:10494]                                 |
| 1259   | 1.9399 | 0.9560 | 0.00E+00 | CNGA1   | cyclic nucleotide gated channel<br>alpha 1 [Source:HGNC<br>Symbol;Acc:HGNC:2148]                          |
| 8605   | 1.5090 | 0.5936 | 0.00E+00 | PLA2G4C | phospholipase A2, group IVC<br>(cytosolic, calcium-independent)<br>[Source:HGNC<br>Symbol;Acc:HGNC:9037]  |
| 170685 | 1.5303 | 0.6138 | 0.00E+00 | NUDT10  | nudix (nucleoside diphosphate<br>linked moiety X)-type motif 10<br>[Source:HGNC<br>Symbol;Acc:HGNC:17621] |
| 51365  | 1.8290 | 0.8711 | 0.00E+00 | PLA1A   | phospholipase A1 member A<br>[Source:HGNC<br>Symbol;Acc:HGNC:17661]                                       |
| 650    | 1.8616 | 0.8966 | 0.00E+00 | BMP2    | bone morphogenetic protein 2<br>[Source:HGNC<br>Symbol;Acc:HGNC:1069]                                     |
| 5198   | 1.5342 | 0.6175 | 0.00E+00 | PFAS    | phosphoribosylformylglycinamide<br>synthase [Source:HGNC<br>Symbol;Acc:HGNC:8863]                         |
| 387758 | 1.8248 | 0.8677 | 0.00E+00 | FIBIN   | fin bud initiation factor homolog<br>(zebrafish) [Source:HGNC<br>Symbol;Acc:HGNC:33747]                   |
| 2331   | 1.7533 | 0.8101 | 0.00E+00 | FMOD    | fibromodulin [Source:HGNC<br>Symbol;Acc:HGNC:3774]                                                        |
| 2350   | 1.7110 | 0.7749 | 0.00E+00 | FOLR2   | folate receptor 2 (fetal)<br>[Source:HGNC<br>Symbol;Acc:HGNC:3793]                                        |
| 10537  | 2.5424 | 1.3462 | 0.00E+00 | UBD     | ubiquitin D [Source:HGNC<br>Symbol;Acc:HGNC:18795]                                                        |
| 146722 | 1.5148 | 0.5991 | 0.00E+00 | CD300LF | CD300 molecule-like family<br>member f [Source:HGNC<br>Symbol;Acc:HGNC:29883]                             |
| 652    | 1.8416 | 0.8810 | 0.00E+00 | BMP4    | bone morphogenetic protein 4<br>[Source:HGNC<br>Symbol;Acc:HGNC:1071]                                     |
| 7980   | 1.9089 | 0.9327 | 0.00E+00 | TFPI2   | tissue factor pathway inhibitor 2<br>[Source:HGNC<br>Symbol;Acc:HGNC:11761]                               |
| 64091  | 1.6074 | 0.6847 | 0.00E+00 | POPDC2  | popeye domain containing 2<br>[Source:HGNC<br>Symbol;Acc:HGNC:17648]                                      |
| 122786 | 1.5183 | 0.6025 | 0.00E+00 | FRMD6   | FERM domain containing 6<br>[Source:HGNC<br>Symbol;Acc:HGNC:19839]                                        |
| 56670  | 2.2346 | 1.1600 | 0.00E+00 | SUCNR1  | succinate receptor 1 [Source:HGNC<br>Symbol;Acc:HGNC:4542]                                                |
| 54440  | 1.6264 | 0.7017 | 0.00E+00 | SASH3   | SAM and SH3 domain containing 3<br>[Source:HGNC<br>Symbol;Acc:HGNC:15975]                                 |
| 3553   | 2.2845 | 1.1919 | 0.00E+00 | IL1B    | interleukin 1, beta [Source:HGNC<br>Symbol;Acc:HGNC:5992]                                                 |
| 83541  | 1.6571 | 0.7286 | 0.00E+00 | FAM110A | family with sequence similarity 110,<br>member A [Source:HGNC<br>Symbol;Acc:HGNC:16188]                   |
| 4069   | 2.0589 | 1.0419 | 0.00E+00 | LYZ     | lysozyme [Source:HGNC<br>Symbol;Acc:HGNC:6740]                                                            |

|        |        |        |          |            |                                                                                                                            |
|--------|--------|--------|----------|------------|----------------------------------------------------------------------------------------------------------------------------|
| 5880   | 1.5967 | 0.6751 | 0.00E+00 | RAC2       | ras-related C3 botulinum toxin substrate 2 (rho family, small GTP binding protein Rac2) [Source:HGNC Symbol;Acc:HGNC:9802] |
| 23378  | 1.5014 | 0.5863 | 0.00E+00 | RRP8       | ribosomal RNA processing 8, methyltransferase, homolog (yeast) [Source:HGNC Symbol;Acc:HGNC:29030]                         |
| 9133   | 1.5263 | 0.6100 | 0.00E+00 | CCNB2      | cyclin B2 [Source:HGNC Symbol;Acc:HGNC:1580]                                                                               |
| 85377  | 1.6049 | 0.6825 | 0.00E+00 | MICALL1    | MICAL-like 1 [Source:HGNC Symbol;Acc:HGNC:29804]                                                                           |
| 253264 | 1.5705 | 0.6512 | 0.00E+00 | ZNF503-AS1 | ZNF503 antisense RNA 1 [Source:HGNC Symbol;Acc:HGNC:27370]                                                                 |
| 7075   | 1.6341 | 0.7085 | 0.00E+00 | TIE1       | tyrosine kinase with immunoglobulin-like and EGF-like domains 1 [Source:HGNC Symbol;Acc:HGNC:11809]                        |
| 126375 | 1.6286 | 0.7037 | 0.00E+00 | ZNF792     | zinc finger protein 792 [Source:HGNC Symbol;Acc:HGNC:24751]                                                                |
| 9603   | 1.5594 | 0.6410 | 0.00E+00 | NFE2L3     | nuclear factor, erythroid 2-like 3 [Source:HGNC Symbol;Acc:HGNC:7783]                                                      |
| 4125   | 1.5590 | 0.6406 | 0.00E+00 | MAN2B1     | mannosidase, alpha, class 2B, member 1 [Source:HGNC Symbol;Acc:HGNC:6826]                                                  |
| 3119   | 1.9625 | 0.9727 | 0.00E+00 | HLA-DQB1   | major histocompatibility complex, class II, DQ beta 1 [Source:HGNC Symbol;Acc:HGNC:4944]                                   |
| 4092   | 1.6715 | 0.7411 | 0.00E+00 | SMAD7      | SMAD family member 7 [Source:HGNC Symbol;Acc:HGNC:6773]                                                                    |
| 84281  | 1.5310 | 0.6145 | 0.00E+00 | C2ORF88    | chromosome 2 open reading frame 88 [Source:HGNC Symbol;Acc:HGNC:28191]                                                     |
| 2207   | 1.9536 | 0.9662 | 0.00E+00 | FCER1G     | Fc fragment of IgE, high affinity I, receptor for; gamma polypeptide [Source:HGNC Symbol;Acc:HGNC:3611]                    |
| 187    | 2.1982 | 1.1363 | 0.00E+00 | APLNR      | apelin receptor [Source:HGNC Symbol;Acc:HGNC:339]                                                                          |
| 11010  | 1.5155 | 0.5998 | 0.00E+00 | GLIPR1     | GLI pathogenesis-related 1 [Source:HGNC Symbol;Acc:HGNC:17001]                                                             |
| 10974  | 1.5283 | 0.6119 | 0.00E+00 | ADIRF      | adipogenesis regulatory factor [Source:HGNC Symbol;Acc:HGNC:24043]                                                         |
| 4237   | 1.5569 | 0.6387 | 0.00E+00 | MFAP2      | microfibrillar-associated protein 2 [Source:HGNC Symbol;Acc:HGNC:7033]                                                     |
| 55900  | 1.5448 | 0.6274 | 0.00E+00 | ZNF302     | zinc finger protein 302 [Source:HGNC Symbol;Acc:HGNC:13848]                                                                |
| 10718  | 1.6048 | 0.6824 | 0.00E+00 | NRG3       | neuregulin 3 [Source:HGNC Symbol;Acc:HGNC:7999]                                                                            |
| 8490   | 1.5941 | 0.6728 | 0.00E+00 | RGS5       | regulator of G-protein signaling 5 [Source:EntrezGene;Acc:8490]                                                            |
| 79778  | 1.6285 | 0.7036 | 0.00E+00 | MICALL2    | MICAL-like 2 [Source:HGNC Symbol;Acc:HGNC:29672]                                                                           |

|        |        |        |          |          |                                                                                                           |
|--------|--------|--------|----------|----------|-----------------------------------------------------------------------------------------------------------|
| 7058   | 2.3112 | 1.2087 | 0.00E+00 | THBS2    | thrombospondin 2 [Source:HGNC Symbol;Acc:HGNC:11786]                                                      |
| 1524   | 2.3199 | 1.2140 | 0.00E+00 | CX3CR1   | chemokine (C-X3-C motif) receptor 1 [Source:HGNC Symbol;Acc:HGNC:2558]                                    |
| 5156   | 1.5183 | 0.6025 | 0.00E+00 | PDGFRA   | platelet-derived growth factor receptor, alpha polypeptide [Source:HGNC Symbol;Acc:HGNC:8803]             |
| 727936 | 1.5399 | 0.6228 | 0.00E+00 | GXYLT2   | glucoside xylosyltransferase 2 [Source:HGNC Symbol;Acc:HGNC:33383]                                        |
| 59     | 1.9215 | 0.9422 | 0.00E+00 | ACTA2    | actin, alpha 2, smooth muscle, aorta [Source:HGNC Symbol;Acc:HGNC:130]                                    |
| 60676  | 1.5898 | 0.6688 | 0.00E+00 | PAPPA2   | pappalysin 2 [Source:HGNC Symbol;Acc:HGNC:14615]                                                          |
| 5507   | 1.8404 | 0.8800 | 0.00E+00 | PPP1R3C  | protein phosphatase 1, regulatory subunit 3C [Source:HGNC Symbol;Acc:HGNC:9293]                           |
| 10631  | 2.1573 | 1.1092 | 0.00E+00 | POSTN    | periostin, osteoblast specific factor [Source:HGNC Symbol;Acc:HGNC:16953]                                 |
| 7133   | 1.5402 | 0.6231 | 0.00E+00 | TNFRSF1B | tumor necrosis factor receptor superfamily, member 1B [Source:HGNC Symbol;Acc:HGNC:11917]                 |
| 595    | 1.6085 | 0.6857 | 0.00E+00 | CCND1    | cyclin D1 [Source:HGNC Symbol;Acc:HGNC:1582]                                                              |
| 2615   | 1.6683 | 0.7384 | 0.00E+00 | LRRC32   | leucine rich repeat containing 32 [Source:HGNC Symbol;Acc:HGNC:4161]                                      |
| 641700 | 1.5180 | 0.6021 | 0.00E+00 | ECSCR    | endothelial cell surface expressed chemotaxis and apoptosis regulator [Source:HGNC Symbol;Acc:HGNC:35454] |
| 3429   | 1.5561 | 0.6380 | 0.00E+00 | IFI27    | interferon, alpha-inducible protein 27 [Source:HGNC Symbol;Acc:HGNC:5397]                                 |
| 2633   | 1.9519 | 0.9648 | 0.00E+00 | GBP1     | guanylate binding protein 1, interferon-inducible [Source:HGNC Symbol;Acc:HGNC:4182]                      |
| 185    | 1.7520 | 0.8090 | 0.00E+00 | AGTR1    | angiotensin II receptor, type 1 [Source:HGNC Symbol;Acc:HGNC:336]                                         |
| 6659   | 1.5640 | 0.6452 | 0.00E+00 | SOX4     | SRY (sex determining region Y)-box 4 [Source:HGNC Symbol;Acc:HGNC:11200]                                  |
| 84171  | 1.7251 | 0.7867 | 0.00E+00 | LOXL4    | lysyl oxidase-like 4 [Source:HGNC Symbol;Acc:HGNC:17171]                                                  |
| 25939  | 1.5904 | 0.6694 | 0.00E+00 | SAMHD1   | SAM domain and HD domain 1 [Source:HGNC Symbol;Acc:HGNC:15925]                                            |
| 7805   | 1.9044 | 0.9294 | 0.00E+00 | LAPTM5   | lysosomal protein transmembrane 5 [Source:HGNC Symbol;Acc:HGNC:29612]                                     |
| 3687   | 1.5723 | 0.6529 | 0.00E+00 | ITGAX    | integrin, alpha X (complement component 3 receptor 4 subunit) [Source:HGNC Symbol;Acc:HGNC:6152]          |
| 127281 | 1.5130 | 0.5974 | 0.00E+00 | FAM213B  | family with sequence similarity 213, member B [Source:HGNC Symbol;Acc:HGNC:28390]                         |

|        |        |        |          |          |                                                                                                                |
|--------|--------|--------|----------|----------|----------------------------------------------------------------------------------------------------------------|
| 5738   | 1.5797 | 0.6597 | 0.00E+00 | PTGFRN   | prostaglandin F2 receptor inhibitor<br>[Source:HGNC<br>Symbol;Acc:HGNC:9601]                                   |
| 58189  | 1.8035 | 0.8508 | 0.00E+00 | WFDC1    | WAP four-disulfide core domain 1<br>[Source:HGNC<br>Symbol;Acc:HGNC:15466]                                     |
| 27242  | 1.7091 | 0.7732 | 0.00E+00 | TNFRSF21 | tumor necrosis factor receptor<br>superfamily, member 21<br>[Source:HGNC<br>Symbol;Acc:HGNC:13469]             |
| 83643  | 1.9292 | 0.9480 | 0.00E+00 | CCDC3    | coiled-coil domain containing 3<br>[Source:HGNC<br>Symbol;Acc:HGNC:23813]                                      |
| 219972 | 2.1736 | 1.1201 | 0.00E+00 | MPEG1    | macrophage expressed 1<br>[Source:HGNC<br>Symbol;Acc:HGNC:29619]                                               |
| 9034   | 1.7018 | 0.7671 | 0.00E+00 | CCRL2    | chemokine (C-C motif) receptor-like<br>2 [Source:HGNC<br>Symbol;Acc:HGNC:1612]                                 |
| 63895  | 1.5231 | 0.6070 | 0.00E+00 | PIEZO2   | piezo-type mechanosensitive ion<br>channel component 2 [Source:HGNC<br>Symbol;Acc:HGNC:26270]                  |
| 3113   | 1.6352 | 0.7095 | 0.00E+00 | HLA-DPA1 | major histocompatibility complex,<br>class II, DP alpha 1 [Source:HGNC<br>Symbol;Acc:HGNC:4938]                |
| 54863  | 1.6563 | 0.7280 | 0.00E+00 | TOR4A    | torsin family 4, member A<br>[Source:HGNC<br>Symbol;Acc:HGNC:25981]                                            |
| 10875  | 1.6015 | 0.6794 | 0.00E+00 | FGL2     | fibrinogen-like 2 [Source:HGNC<br>Symbol;Acc:HGNC:3696]                                                        |
| 7298   | 1.7130 | 0.7765 | 0.00E+00 | TYMS     | thymidylate synthetase<br>[Source:HGNC<br>Symbol;Acc:HGNC:12441]                                               |
| 5764   | 1.9146 | 0.9371 | 0.00E+00 | PTN      | pleiotrophin [Source:HGNC<br>Symbol;Acc:HGNC:9630]                                                             |
| 140628 | 1.6388 | 0.7127 | 0.00E+00 | GATA5    | GATA binding protein 5<br>[Source:HGNC<br>Symbol;Acc:HGNC:15802]                                               |
| 55920  | 1.5089 | 0.5935 | 0.00E+00 | RCC2     | regulator of chromosome<br>condensation 2 [Source:HGNC<br>Symbol;Acc:HGNC:30297]                               |
| 1909   | 1.7598 | 0.8154 | 0.00E+00 | EDNRA    | endothelin receptor type A<br>[Source:HGNC<br>Symbol;Acc:HGNC:3179]                                            |
| 10184  | 1.5553 | 0.6372 | 0.00E+00 | LHFPL2   | lipoma HMGIC fusion partner-like 2<br>[Source:HGNC<br>Symbol;Acc:HGNC:6588]                                    |
| 1009   | 1.6923 | 0.7590 | 0.00E+00 | CDH11    | cadherin 11, type 2, OB-cadherin<br>(osteoblast) [Source:HGNC<br>Symbol;Acc:HGNC:1750]                         |
| 4886   | 1.6339 | 0.7083 | 0.00E+00 | NPY1R    | neuropeptide Y receptor Y1<br>[Source:HGNC<br>Symbol;Acc:HGNC:7956]                                            |
| 3560   | 1.5807 | 0.6606 | 0.00E+00 | IL2RB    | interleukin 2 receptor, beta<br>[Source:HGNC<br>Symbol;Acc:HGNC:6009]                                          |
| 7345   | 2.3543 | 1.2353 | 0.00E+00 | UCHL1    | ubiquitin carboxyl-terminal<br>esterase L1 (ubiquitin thiolesterase)<br>[Source:HGNC<br>Symbol;Acc:HGNC:12513] |
| 284611 | 1.6277 | 0.7029 | 0.00E+00 | FAM102B  | family with sequence similarity 102,<br>member B [Source:HGNC<br>Symbol;Acc:HGNC:27637]                        |



|               |        |        |          |         |                                                                                                      |
|---------------|--------|--------|----------|---------|------------------------------------------------------------------------------------------------------|
| 1234          | 1.6617 | 0.7327 | 0.00E+00 | CCR5    | chemokine (C-C motif) receptor 5 (gene/pseudogene) [Source:HGNC Symbol;Acc:HGNC:1606]                |
| 60490         | 1.5215 | 0.6055 | 0.00E+00 | PPCDC   | phosphopantothenoylcysteine decarboxylase [Source:HGNC Symbol;Acc:HGNC:28107]                        |
| 3489          | 1.8255 | 0.8683 | 0.00E+00 | IGFBP6  | insulin-like growth factor binding protein 6 [Source:HGNC Symbol;Acc:HGNC:5475]                      |
| 221184        | 1.5552 | 0.6371 | 0.00E+00 | CPNE2   | copine II [Source:HGNC Symbol;Acc:HGNC:2315]                                                         |
| 2701          | 1.9765 | 0.9830 | 0.00E+00 | GJA4    | gap junction protein, alpha 4, 37kDa [Source:HGNC Symbol;Acc:HGNC:4278]                              |
| 23500         | 1.5337 | 0.6170 | 0.00E+00 | DAAM2   | dishevelled associated activator of morphogenesis 2 [Source:HGNC Symbol;Acc:HGNC:18143]              |
| 1307          | 1.6672 | 0.7374 | 0.00E+00 | COL16A1 | collagen, type XVI, alpha 1 [Source:HGNC Symbol;Acc:HGNC:2193]                                       |
| 9046          | 1.5783 | 0.6584 | 0.00E+00 | DOK2    | docking protein 2, 56kDa [Source:HGNC Symbol;Acc:HGNC:2991]                                          |
| 23166         | 1.5178 | 0.6020 | 0.00E+00 | STAB1   | stabilin 1 [Source:HGNC Symbol;Acc:HGNC:18628]                                                       |
| 25927         | 1.5718 | 0.6524 | 0.00E+00 | CNRIP1  | cannabinoid receptor interacting protein 1 [Source:HGNC Symbol;Acc:HGNC:24546]                       |
| 375387        | 1.5093 | 0.5939 | 0.00E+00 | NRROS   | negative regulator of reactive oxygen species [Source:HGNC Symbol;Acc:HGNC:24613]                    |
| 7837          | 1.6257 | 0.7011 | 0.00E+00 | PXDN    | peroxidasin [Source:HGNC Symbol;Acc:HGNC:14966]                                                      |
| 168537        | 1.5872 | 0.6665 | 0.00E+00 | GIMAP7  | GTPase, IMAP family member 7 [Source:HGNC Symbol;Acc:HGNC:22404]                                     |
| 109           | 1.6325 | 0.7070 | 0.00E+00 | ADCY3   | adenylate cyclase 3 [Source:HGNC Symbol;Acc:HGNC:234]                                                |
| 51285         | 1.5799 | 0.6598 | 0.00E+00 | RASL12  | RAS-like, family 12 [Source:HGNC Symbol;Acc:HGNC:30289]                                              |
| 9902          | 1.7759 | 0.8285 | 0.00E+00 | MRC2    | mannose receptor, C type 2 [Source:HGNC Symbol;Acc:HGNC:16875]                                       |
| 10437         | 2.1764 | 1.1220 | 0.00E+00 | IFI30   | interferon, gamma-inducible protein 30 [Source:HGNC Symbol;Acc:HGNC:5398]                            |
| 7424          | 1.9287 | 0.9476 | 0.00E+00 | VEGFC   | vascular endothelial growth factor C [Source:HGNC Symbol;Acc:HGNC:12682]                             |
| 25902         | 1.5103 | 0.5949 | 0.00E+00 | MTHFD1L | methylenetetrahydrofolate dehydrogenase (NADP+ dependent) 1-like [Source:HGNC Symbol;Acc:HGNC:21055] |
| 2487          | 1.7761 | 0.8287 | 0.00E+00 | FRZB    | frizzled-related protein [Source:HGNC Symbol;Acc:HGNC:3959]                                          |
| 100628<br>315 | 1.7406 | 0.7996 | 0.00E+00 | DNM3OS  | DNM3 opposite strand/antisense RNA [Source:HGNC Symbol;Acc:HGNC:41228]                               |
| 1879          | 1.5975 | 0.6758 | 0.00E+00 | EBF1    | early B-cell factor 1 [Source:HGNC Symbol;Acc:HGNC:3126]                                             |
| 196883        | 1.6064 | 0.6839 | 0.00E+00 | ADCY4   | adenylate cyclase 4 [Source:HGNC Symbol;Acc:HGNC:235]                                                |

|        |        |        |          |          |                                                                                                           |
|--------|--------|--------|----------|----------|-----------------------------------------------------------------------------------------------------------|
| 3594   | 1.5051 | 0.5899 | 0.00E+00 | IL12RB1  | interleukin 12 receptor, beta 1<br>[Source:HGNC<br>Symbol;Acc:HGNC:5971]                                  |
| 1289   | 1.6446 | 0.7178 | 0.00E+00 | COL5A1   | collagen, type V, alpha 1<br>[Source:HGNC<br>Symbol;Acc:HGNC:2209]                                        |
| 25805  | 1.7787 | 0.8308 | 0.00E+00 | BAMBI    | BMP and activin membrane-bound<br>inhibitor [Source:HGNC<br>Symbol;Acc:HGNC:30251]                        |
| 3587   | 2.2059 | 1.1414 | 0.00E+00 | IL10RA   | interleukin 10 receptor, alpha<br>[Source:HGNC<br>Symbol;Acc:HGNC:5964]                                   |
| 79572  | 1.6250 | 0.7004 | 0.00E+00 | ATP13A3  | ATPase type 13A3 [Source:HGNC<br>Symbol;Acc:HGNC:24113]                                                   |
| 3087   | 2.0343 | 1.0245 | 0.00E+00 | HHEX     | hematopoietically expressed<br>homeobox [Source:HGNC<br>Symbol;Acc:HGNC:4901]                             |
| 94274  | 1.9355 | 0.9527 | 0.00E+00 | PPP1R14A | protein phosphatase 1, regulatory<br>(inhibitor) subunit 14A<br>[Source:HGNC<br>Symbol;Acc:HGNC:14871]    |
| 23604  | 1.5857 | 0.6651 | 0.00E+00 | DAPK2    | death-associated protein kinase 2<br>[Source:HGNC<br>Symbol;Acc:HGNC:2675]                                |
| 79690  | 1.6062 | 0.6836 | 0.00E+00 | GAL3ST4  | galactose-3-O-sulfotransferase 4<br>[Source:HGNC<br>Symbol;Acc:HGNC:24145]                                |
| 57608  | 1.5089 | 0.5935 | 0.00E+00 | KIAA1462 | KIAA1462 [Source:HGNC<br>Symbol;Acc:HGNC:29283]                                                           |
| 7305   | 2.3836 | 1.2532 | 0.00E+00 | TYROBP   | TYRO protein tyrosine kinase<br>binding protein [Source:HGNC<br>Symbol;Acc:HGNC:12449]                    |
| 5549   | 1.7605 | 0.8160 | 0.00E+00 | PRELP    | proline/arginine-rich end leucine-<br>rich repeat protein [Source:HGNC<br>Symbol;Acc:HGNC:9357]           |
| 55076  | 1.5630 | 0.6443 | 0.00E+00 | TMEM45A  | transmembrane protein 45A<br>[Source:HGNC<br>Symbol;Acc:HGNC:25480]                                       |
| 138311 | 1.5042 | 0.5890 | 0.00E+00 | FAM69B   | family with sequence similarity 69,<br>member B [Source:HGNC<br>Symbol;Acc:HGNC:28290]                    |
| 2634   | 1.6814 | 0.7497 | 0.00E+00 | GBP2     | guanylate binding protein 2,<br>interferon-inducible [Source:HGNC<br>Symbol;Acc:HGNC:4183]                |
| 3768   | 1.5924 | 0.6712 | 0.00E+00 | KCNJ12   | potassium channel, inwardly<br>rectifying subfamily J, member 12<br>[Source:HGNC<br>Symbol;Acc:HGNC:6258] |
| 5341   | 2.0594 | 1.0422 | 0.00E+00 | PLEK     | pleckstrin [Source:HGNC<br>Symbol;Acc:HGNC:9070]                                                          |
| 170575 | 1.5405 | 0.6234 | 0.00E+00 | GIMAP1   | GTPase, IMAP family member 1<br>[Source:HGNC<br>Symbol;Acc:HGNC:23237]                                    |
| 112464 | 1.5888 | 0.6680 | 0.00E+00 | PRKCDBP  | protein kinase C, delta binding<br>protein [Source:HGNC<br>Symbol;Acc:HGNC:9400]                          |
| 3059   | 2.0214 | 1.0154 | 0.00E+00 | HCLS1    | hematopoietic cell-specific Lyn<br>substrate 1 [Source:HGNC<br>Symbol;Acc:HGNC:4844]                      |
| 389119 | 1.5553 | 0.6372 | 0.00E+00 | FAM212A  | family with sequence similarity 212,<br>member A [Source:HGNC<br>Symbol;Acc:HGNC:32480]                   |

|        |        |        |          |          |                                                                                             |
|--------|--------|--------|----------|----------|---------------------------------------------------------------------------------------------|
| 55803  | 1.6342 | 0.7086 | 0.00E+00 | ADAP2    | ArfGAP with dual PH domains 2<br>[Source:HGNC<br>Symbol;Acc:HGNC:16487]                     |
| 23240  | 2.1274 | 1.0891 | 0.00E+00 | KIAA0922 | KIAA0922 [Source:HGNC<br>Symbol;Acc:HGNC:29146]                                             |
| 55281  | 1.5670 | 0.6480 | 0.00E+00 | TMEM140  | transmembrane protein 140<br>[Source:HGNC<br>Symbol;Acc:HGNC:21870]                         |
| 7978   | 1.5666 | 0.6476 | 0.00E+00 | MTERF1   | mitochondrial transcription<br>termination factor 1 [Source:HGNC<br>Symbol;Acc:HGNC:21463]  |
| 140706 | 1.8214 | 0.8650 | 0.00E+00 | CCM2L    | cerebral cavernous malformation 2-<br>like [Source:HGNC<br>Symbol;Acc:HGNC:16153]           |
| 9535   | 1.5168 | 0.6010 | 0.00E+00 | GMFG     | glia maturation factor, gamma<br>[Source:HGNC<br>Symbol;Acc:HGNC:4374]                      |
| 79064  | 1.5987 | 0.6769 | 0.00E+00 | TMEM223  | transmembrane protein 223<br>[Source:HGNC<br>Symbol;Acc:HGNC:28464]                         |
| 219699 | 1.5184 | 0.6025 | 0.00E+00 | UNC5B    | unc-5 homolog B (C. elegans)<br>[Source:HGNC<br>Symbol;Acc:HGNC:12568]                      |
| 55619  | 1.7970 | 0.8456 | 0.00E+00 | DOCK10   | dedicator of cytokinesis 10<br>[Source:HGNC<br>Symbol;Acc:HGNC:23479]                       |
| 79834  | 1.5450 | 0.6276 | 0.00E+00 | PEAK1    | pseudopodium-enriched atypical<br>kinase 1 [Source:HGNC<br>Symbol;Acc:HGNC:29431]           |
| 56944  | 2.2274 | 1.1554 | 0.00E+00 | OLFML3   | olfactomedin-like 3 [Source:HGNC<br>Symbol;Acc:HGNC:24956]                                  |
| 976    | 1.7135 | 0.7769 | 0.00E+00 | ADGRE5   | adhesion G protein-coupled<br>receptor E5 [Source:HGNC<br>Symbol;Acc:HGNC:1711]             |
| 965    | 1.5254 | 0.6092 | 0.00E+00 | CD58     | CD58 molecule [Source:HGNC<br>Symbol;Acc:HGNC:1688]                                         |
| 5228   | 2.0013 | 1.0009 | 0.00E+00 | PGF      | placental growth factor<br>[Source:HGNC<br>Symbol;Acc:HGNC:8893]                            |
| 55106  | 1.6632 | 0.7339 | 0.00E+00 | SLFN12   | schlafen family member 12<br>[Source:HGNC<br>Symbol;Acc:HGNC:25500]                         |
| 974    | 1.5653 | 0.6465 | 0.00E+00 | CD79B    | CD79b molecule, immunoglobulin-<br>associated beta [Source:HGNC<br>Symbol;Acc:HGNC:1699]    |
| 1303   | 1.6306 | 0.7054 | 0.00E+00 | COL12A1  | collagen, type XII, alpha 1<br>[Source:HGNC<br>Symbol;Acc:HGNC:2188]                        |
| 200942 | 1.5001 | 0.5850 | 0.00E+00 | KLHDC8B  | kelch domain containing 8B<br>[Source:HGNC<br>Symbol;Acc:HGNC:28557]                        |
| 1284   | 1.6852 | 0.7529 | 0.00E+00 | COL4A2   | collagen, type IV, alpha 2<br>[Source:HGNC<br>Symbol;Acc:HGNC:2203]                         |
| 126669 | 1.5571 | 0.6389 | 0.00E+00 | SHE      | Src homology 2 domain containing<br>E [Source:HGNC<br>Symbol;Acc:HGNC:27004]                |
| 2702   | 1.5902 | 0.6692 | 0.00E+00 | GJA5     | gap junction protein, alpha 5, 40kDa<br>[Source:HGNC<br>Symbol;Acc:HGNC:4279]               |
| 79974  | 1.5612 | 0.6427 | 0.00E+00 | CPED1    | cadherin-like and PC-esterase<br>domain containing 1 [Source:HGNC<br>Symbol;Acc:HGNC:26159] |

|        |        |        |          |          |                                                                                                                                       |
|--------|--------|--------|----------|----------|---------------------------------------------------------------------------------------------------------------------------------------|
| 114801 | 2.5820 | 1.3685 | 0.00E+00 | TMEM200A | transmembrane protein 200A<br>[Source:HGNC<br>Symbol;Acc:HGNC:21075]                                                                  |
| 1396   | 2.0772 | 1.0546 | 0.00E+00 | CRIP1    | cysteine-rich protein 1 (intestinal)<br>[Source:HGNC<br>Symbol;Acc:HGNC:2360]                                                         |
| 10544  | 1.6174 | 0.6937 | 0.00E+00 | PROCR    | protein C receptor, endothelial<br>[Source:HGNC<br>Symbol;Acc:HGNC:9452]                                                              |
| 55303  | 1.5405 | 0.6234 | 0.00E+00 | GIMAP4   | GTPase, IMAP family member 4<br>[Source:HGNC<br>Symbol;Acc:HGNC:21872]                                                                |
| 4162   | 1.5216 | 0.6056 | 0.00E+00 | MCAM     | melanoma cell adhesion molecule<br>[Source:HGNC<br>Symbol;Acc:HGNC:6934]                                                              |
| 87     | 1.8147 | 0.8597 | 0.00E+00 | ACTN1    | actinin, alpha 1 [Source:HGNC<br>Symbol;Acc:HGNC:163]                                                                                 |
| 7351   | 2.1194 | 1.0837 | 0.00E+00 | UCP2     | uncoupling protein 2<br>(mitochondrial, proton carrier)<br>[Source:HGNC<br>Symbol;Acc:HGNC:12518]                                     |
| 784    | 1.5677 | 0.6486 | 0.00E+00 | CACNB3   | calcium channel, voltage-dependent,<br>beta 3 subunit [Source:HGNC<br>Symbol;Acc:HGNC:1403]                                           |
| 1193   | 1.6124 | 0.6892 | 0.00E+00 | CLIC2    | chloride intracellular channel 2<br>[Source:HGNC<br>Symbol;Acc:HGNC:2063]                                                             |
| 4242   | 1.6402 | 0.7139 | 0.00E+00 | MFNG     | MFNG O-fucosylpeptide 3-beta-N-<br>acetylglucosaminyltransferase<br>[Source:HGNC<br>Symbol;Acc:HGNC:7038]                             |
| 2791   | 1.5439 | 0.6266 | 0.00E+00 | GNG11    | guanine nucleotide binding protein<br>(G protein), gamma 11<br>[Source:HGNC<br>Symbol;Acc:HGNC:4403]                                  |
| 8829   | 1.5104 | 0.5949 | 0.00E+00 | NRP1     | neuropilin 1 [Source:HGNC<br>Symbol;Acc:HGNC:8004]                                                                                    |
| 162394 | 1.5043 | 0.5891 | 0.00E+00 | SLFN5    | schlafen family member 5<br>[Source:HGNC<br>Symbol;Acc:HGNC:28286]                                                                    |
| 10266  | 1.8763 | 0.9079 | 0.00E+00 | RAMP2    | receptor (G protein-coupled)<br>activity modifying protein 2<br>[Source:HGNC<br>Symbol;Acc:HGNC:9844]                                 |
| 89849  | 1.5407 | 0.6236 | 0.00E+00 | ATG16L2  | autophagy related 16-like 2 (S.<br>cerevisiae) [Source:HGNC<br>Symbol;Acc:HGNC:25464]                                                 |
| 285382 | 1.8770 | 0.9084 | 0.00E+00 | C3ORF70  | chromosome 3 open reading frame<br>70 [Source:HGNC<br>Symbol;Acc:HGNC:33731]                                                          |
| 5924   | 1.6641 | 0.7347 | 0.00E+00 | RASGRF2  | Ras protein-specific guanine<br>nucleotide-releasing factor 2<br>[Source:HGNC<br>Symbol;Acc:HGNC:9876]                                |
| 9710   | 1.5178 | 0.6019 | 0.00E+00 | KIAA0355 | KIAA0355 [Source:HGNC<br>Symbol;Acc:HGNC:29016]                                                                                       |
| 10312  | 1.6836 | 0.7515 | 0.00E+00 | TCIRG1   | T-cell, immune regulator 1, ATPase,<br>H <sup>+</sup> transporting, lysosomal V0<br>subunit A3 [Source:HGNC<br>Symbol;Acc:HGNC:11647] |
| 29941  | 1.6680 | 0.7381 | 0.00E+00 | PKN3     | protein kinase N3 [Source:HGNC<br>Symbol;Acc:HGNC:17999]                                                                              |
| 165    | 2.1521 | 1.1058 | 0.00E+00 | AEBP1    | AE binding protein 1 [Source:HGNC<br>Symbol;Acc:HGNC:303]                                                                             |

|        |        |        |          |           |                                                                                           |
|--------|--------|--------|----------|-----------|-------------------------------------------------------------------------------------------|
| 126282 | 1.8706 | 0.9035 | 0.00E+00 | TNFAIP8L1 | tumor necrosis factor, alpha-induced protein 8-like 1 [Source:HGNC Symbol;Acc:HGNC:28279] |
| 79258  | 1.5797 | 0.6596 | 0.00E+00 | MMEL1     | membrane metallo-endopeptidase-like 1 [Source:HGNC Symbol;Acc:HGNC:14668]                 |
| 58191  | 1.5642 | 0.6454 | 0.00E+00 | CXCL16    | chemokine (C-X-C motif) ligand 16 [Source:HGNC Symbol;Acc:HGNC:16642]                     |
| 4846   | 1.6690 | 0.7389 | 0.00E+00 | NOS3      | nitric oxide synthase 3 (endothelial cell) [Source:HGNC Symbol;Acc:HGNC:7876]             |
| 3714   | 1.7767 | 0.8292 | 0.00E+00 | JAG2      | jagged 2 [Source:HGNC Symbol;Acc:HGNC:6189]                                               |
| 29108  | 1.8500 | 0.8875 | 0.00E+00 | PYCARD    | PYD and CARD domain containing [Source:HGNC Symbol;Acc:HGNC:16608]                        |
| 4854   | 1.5192 | 0.6033 | 0.00E+00 | NOTCH3    | notch 3 [Source:HGNC Symbol;Acc:HGNC:7883]                                                |
| 2      | 1.5218 | 0.6058 | 0.00E+00 | A2M       | alpha-2-macroglobulin [Source:HGNC Symbol;Acc:HGNC:7]                                     |
| 10161  | 2.2051 | 1.1409 | 0.00E+00 | LPAR6     | lysophosphatidic acid receptor 6 [Source:HGNC Symbol;Acc:HGNC:15520]                      |
| 344558 | 1.6497 | 0.7222 | 0.00E+00 | SH3RF3    | SH3 domain containing ring finger 3 [Source:HGNC Symbol;Acc:HGNC:24699]                   |
| 1281   | 2.4930 | 1.3179 | 0.00E+00 | COL3A1    | collagen, type III, alpha 1 [Source:HGNC Symbol;Acc:HGNC:2201]                            |
| 26031  | 1.6512 | 0.7235 | 0.00E+00 | OSBPL3    | oxysterol binding protein-like 3 [Source:HGNC Symbol;Acc:HGNC:16370]                      |
| 93109  | 1.6657 | 0.7361 | 0.00E+00 | TMEM44    | transmembrane protein 44 [Source:HGNC Symbol;Acc:HGNC:25120]                              |
| 27253  | 1.9630 | 0.9731 | 0.00E+00 | PCDH17    | protocadherin 17 [Source:HGNC Symbol;Acc:HGNC:14267]                                      |
| 4330   | 2.2264 | 1.1547 | 0.00E+00 | MN1       | meningioma (disrupted in balanced translocation) 1 [Source:HGNC Symbol;Acc:HGNC:7180]     |
| 83706  | 1.6440 | 0.7172 | 0.00E+00 | FERMT3    | fermitin family member 3 [Source:HGNC Symbol;Acc:HGNC:23151]                              |
| 23336  | 1.7215 | 0.7837 | 0.00E+00 | SYNM      | synemin, intermediate filament protein [Source:HGNC Symbol;Acc:HGNC:24466]                |
| 929    | 2.1953 | 1.1344 | 0.00E+00 | CD14      | CD14 molecule [Source:HGNC Symbol;Acc:HGNC:1628]                                          |
| 1436   | 2.5557 | 1.3537 | 0.00E+00 | CSF1R     | colony stimulating factor 1 receptor [Source:HGNC Symbol;Acc:HGNC:2433]                   |
| 2037   | 1.5566 | 0.6384 | 0.00E+00 | EPB41L2   | erythrocyte membrane protein band 4.1-like 2 [Source:HGNC Symbol;Acc:HGNC:3379]           |
| 441478 | 2.5758 | 1.3650 | 0.00E+00 | NRARP     | NOTCH-regulated ankyrin repeat protein [Source:HGNC Symbol;Acc:HGNC:33843]                |
| 5118   | 1.9377 | 0.9543 | 0.00E+00 | PCOLCE    | procollagen C-endopeptidase enhancer [Source:HGNC Symbol;Acc:HGNC:8738]                   |

|        |        |        |          |          |                                                                                                     |
|--------|--------|--------|----------|----------|-----------------------------------------------------------------------------------------------------|
| 22808  | 1.5497 | 0.6320 | 0.00E+00 | MRAS     | muscle RAS oncogene homolog<br>[Source:HGNC<br>Symbol;Acc:HGNC:7227]                                |
| 51155  | 1.5240 | 0.6079 | 0.00E+00 | HN1      | hematological and neurological<br>expressed 1 [Source:HGNC<br>Symbol;Acc:HGNC:14569]                |
| 57182  | 1.6178 | 0.6940 | 0.00E+00 | ANKRD50  | ankyrin repeat domain 50<br>[Source:HGNC<br>Symbol;Acc:HGNC:29223]                                  |
| 5547   | 1.5198 | 0.6039 | 0.00E+00 | PRCP     | prolylcarboxypeptidase<br>(angiotensinase C) [Source:HGNC<br>Symbol;Acc:HGNC:9344]                  |
| 91010  | 1.6556 | 0.7273 | 0.00E+00 | FMNL3    | formin-like 3 [Source:HGNC<br>Symbol;Acc:HGNC:23698]                                                |
| 2200   | 1.6202 | 0.6962 | 0.00E+00 | FBN1     | fibrillin 1 [Source:HGNC<br>Symbol;Acc:HGNC:3603]                                                   |
| 3216   | 1.8879 | 0.9168 | 0.00E+00 | HOXB6    | homeobox B6 [Source:HGNC<br>Symbol;Acc:HGNC:5117]                                                   |
| 56654  | 1.7018 | 0.7670 | 0.00E+00 | NPDC1    | neural proliferation, differentiation<br>and control, 1 [Source:HGNC<br>Symbol;Acc:HGNC:7899]       |
| 157285 | 2.0651 | 1.0462 | 0.00E+00 | SGK223   | Tyrosine-protein kinase Sgk223<br>[Source:UniProtKB/Swiss-<br>Prot;Acc:Q86YV5]                      |
| 719    | 2.4013 | 1.2638 | 0.00E+00 | C3AR1    | complement component 3a receptor<br>1 [Source:HGNC<br>Symbol;Acc:HGNC:1319]                         |
| 1036   | 2.0980 | 1.0690 | 0.00E+00 | CDO1     | cysteine dioxygenase type 1<br>[Source:HGNC<br>Symbol;Acc:HGNC:1795]                                |
| 79047  | 1.5451 | 0.6277 | 0.00E+00 | KCTD15   | potassium channel tetramerization<br>domain containing 15<br>[Source:HGNC<br>Symbol;Acc:HGNC:23297] |
| 947    | 1.9840 | 0.9884 | 0.00E+00 | CD34     | CD34 molecule [Source:HGNC<br>Symbol;Acc:HGNC:1662]                                                 |
| 151887 | 1.9647 | 0.9743 | 0.00E+00 | CCDC80   | coiled-coil domain containing 80<br>[Source:HGNC<br>Symbol;Acc:HGNC:30649]                          |
| 3142   | 2.3118 | 1.2090 | 0.00E+00 | HLX      | H2.0-like homeobox [Source:HGNC<br>Symbol;Acc:HGNC:4978]                                            |
| 1893   | 3.2799 | 1.7137 | 0.00E+00 | ECM1     | extracellular matrix protein 1<br>[Source:HGNC<br>Symbol;Acc:HGNC:3153]                             |
| 79888  | 1.5127 | 0.5971 | 0.00E+00 | LPCAT1   | lysophosphatidylcholine<br>acyltransferase 1 [Source:HGNC<br>Symbol;Acc:HGNC:25718]                 |
| 25960  | 1.7276 | 0.7887 | 0.00E+00 | ADGRA2   | adhesion G protein-coupled<br>receptor A2 [Source:HGNC<br>Symbol;Acc:HGNC:17849]                    |
| 54751  | 1.5169 | 0.6011 | 0.00E+00 | FBLIM1   | filamin binding LIM protein 1<br>[Source:HGNC<br>Symbol;Acc:HGNC:24686]                             |
| 4313   | 2.2424 | 1.1650 | 0.00E+00 | MMP2     | matrix metalloproteinase 2<br>[Source:HGNC<br>Symbol;Acc:HGNC:7166]                                 |
| 83742  | 1.6249 | 0.7004 | 0.00E+00 | MARVELD1 | MARVEL domain containing 1<br>[Source:HGNC<br>Symbol;Acc:HGNC:28674]                                |
| 6926   | 1.7748 | 0.8277 | 0.00E+00 | TBX3     | T-box 3 [Source:HGNC<br>Symbol;Acc:HGNC:11602]                                                      |

|        |        |        |          |          |                                                                                                     |
|--------|--------|--------|----------|----------|-----------------------------------------------------------------------------------------------------|
| 4082   | 2.0256 | 1.0183 | 0.00E+00 | MARCKS   | myristoylated alanine-rich protein kinase C substrate [Source:HGNC Symbol;Acc:HGNC:6759]            |
| 2022   | 1.7843 | 0.8354 | 0.00E+00 | ENG      | endoglin [Source:HGNC Symbol;Acc:HGNC:3349]                                                         |
| 9262   | 1.8833 | 0.9132 | 0.00E+00 | STK17B   | serine/threonine kinase 17b [Source:HGNC Symbol;Acc:HGNC:11396]                                     |
| 1282   | 1.8867 | 0.9159 | 0.00E+00 | COL4A1   | collagen, type IV, alpha 1 [Source:HGNC Symbol;Acc:HGNC:2202]                                       |
| 7045   | 2.3436 | 1.2287 | 0.00E+00 | TGFBI    | transforming growth factor, beta-induced, 68kDa [Source:HGNC Symbol;Acc:HGNC:11771]                 |
| 10800  | 2.1932 | 1.1330 | 0.00E+00 | CYSLTR1  | cysteinyl leukotriene receptor 1 [Source:HGNC Symbol;Acc:HGNC:17451]                                |
| 2122   | 2.2532 | 1.1720 | 0.00E+00 | MECOM    | MDS1 and EVI1 complex locus [Source:HGNC Symbol;Acc:HGNC:3498]                                      |
| 1050   | 1.9230 | 0.9434 | 0.00E+00 | CEBPA    | CCAAT/enhancer binding protein (C/EBP), alpha [Source:HGNC Symbol;Acc:HGNC:1833]                    |
| 6591   | 2.2864 | 1.1931 | 0.00E+00 | SNAI2    | snail family zinc finger 2 [Source:HGNC Symbol;Acc:HGNC:11094]                                      |
| 1290   | 2.1905 | 1.1313 | 0.00E+00 | COL5A2   | collagen, type V, alpha 2 [Source:HGNC Symbol;Acc:HGNC:2210]                                        |
| 23208  | 2.2482 | 1.1688 | 0.00E+00 | SYT11    | synaptotagmin XI [Source:HGNC Symbol;Acc:HGNC:19239]                                                |
| 4921   | 1.5727 | 0.6533 | 0.00E+00 | DDR2     | discoidin domain receptor tyrosine kinase 2 [Source:HGNC Symbol;Acc:HGNC:2731]                      |
| 84674  | 1.6669 | 0.7372 | 0.00E+00 | CARD6    | caspase recruitment domain family, member 6 [Source:HGNC Symbol;Acc:HGNC:16394]                     |
| 171024 | 2.0447 | 1.0319 | 0.00E+00 | SYNPO2   | synaptopodin 2 [Source:HGNC Symbol;Acc:HGNC:17732]                                                  |
| 874    | 1.9107 | 0.9341 | 0.00E+00 | CBR3     | carbonyl reductase 3 [Source:HGNC Symbol;Acc:HGNC:1549]                                             |
| 65059  | 1.8226 | 0.8660 | 0.00E+00 | RAPH1    | Ras association (RalGDS/AF-6) and pleckstrin homology domains 1 [Source:HGNC Symbol;Acc:HGNC:14436] |
| 2335   | 2.8077 | 1.4894 | 0.00E+00 | FN1      | fibronectin 1 [Source:HGNC Symbol;Acc:HGNC:3778]                                                    |
| 26119  | 1.8511 | 0.8884 | 0.00E+00 | LDLRAP1  | low density lipoprotein receptor adaptor protein 1 [Source:HGNC Symbol;Acc:HGNC:18640]              |
| 22899  | 1.9415 | 0.9572 | 0.00E+00 | ARHGEF15 | Rho guanine nucleotide exchange factor (GEF) 15 [Source:HGNC Symbol;Acc:HGNC:15590]                 |
| 753    | 1.7709 | 0.8245 | 0.00E+00 | LDLRAD4  | low density lipoprotein receptor class A domain containing 4 [Source:HGNC Symbol;Acc:HGNC:1224]     |
| 81831  | 2.0668 | 1.0474 | 0.00E+00 | NETO2    | neuropilin (NRP) and tolloid (TLL)-like 2 [Source:HGNC Symbol;Acc:HGNC:14644]                       |
| 960    | 2.1239 | 1.0867 | 0.00E+00 | CD44     | CD44 molecule (Indian blood group) [Source:HGNC Symbol;Acc:HGNC:1681]                               |

|       |        |         |          |         |                                                                                                                          |
|-------|--------|---------|----------|---------|--------------------------------------------------------------------------------------------------------------------------|
| 5742  | 2.9247 | 1.5483  | 0.00E+00 | PTGS1   | prostaglandin-endoperoxide synthase 1 (prostaglandin G/H synthase and cyclooxygenase) [Source:HGNC Symbol;Acc:HGNC:9604] |
| 2982  | 2.0331 | 1.0237  | 0.00E+00 | GUCY1A3 | guanylate cyclase 1, soluble, alpha 3 [Source:HGNC Symbol;Acc:HGNC:4685]                                                 |
| 53827 | 2.2068 | 1.1420  | 0.00E+00 | FXVD5   | FXVD domain containing ion transport regulator 5 [Source:HGNC Symbol;Acc:HGNC:4029]                                      |
| 2014  | 2.0619 | 1.0440  | 0.00E+00 | EMP3    | epithelial membrane protein 3 [Source:HGNC Symbol;Acc:HGNC:3335]                                                         |
| 51063 | 1.9641 | 0.9738  | 0.00E+00 | CALHM2  | calcium homeostasis modulator 2 [Source:HGNC Symbol;Acc:HGNC:23493]                                                      |
| 56892 | 2.9758 | 1.5733  | 0.00E+00 | C8ORF4  | chromosome 8 open reading frame 4 [Source:HGNC Symbol;Acc:HGNC:1357]                                                     |
| 2625  | 3.5510 | 1.8282  | 0.00E+00 | GATA3   | GATA binding protein 3 [Source:HGNC Symbol;Acc:HGNC:4172]                                                                |
| 64321 | 3.3012 | 1.7230  | 0.00E+00 | SOX17   | SRY (sex determining region Y)-box 17 [Source:HGNC Symbol;Acc:HGNC:18122]                                                |
| 1278  | 5.3537 | 2.4205  | 0.00E+00 | COL1A2  | collagen, type I, alpha 2 [Source:HGNC Symbol;Acc:HGNC:2198]                                                             |
| 4066  | 2.2891 | 1.1948  | 0.00E+00 | LYL1    | lymphoblastic leukemia associated hematopoiesis regulator 1 [Source:HGNC Symbol;Acc:HGNC:6734]                           |
| 54510 | 3.0890 | 1.6271  | 0.00E+00 | PCDH18  | protocadherin 18 [Source:HGNC Symbol;Acc:HGNC:14268]                                                                     |
| 1843  | 0.1954 | -2.3553 | 0.00E+00 | DUSP1   | dual specificity phosphatase 1 [Source:HGNC Symbol;Acc:HGNC:3064]                                                        |
| 1958  | 0.1452 | -2.7843 | 0.00E+00 | EGR1    | early growth response 1 [Source:HGNC Symbol;Acc:HGNC:3238]                                                               |
| 7538  | 0.1903 | -2.3940 | 0.00E+00 | ZFP36   | ZFP36 ring finger protein [Source:HGNC Symbol;Acc:HGNC:12862]                                                            |
| 54546 | 0.2433 | -2.0395 | 0.00E+00 | RNF186  | ring finger protein 186 [Source:HGNC Symbol;Acc:HGNC:25978]                                                              |
| 1052  | 0.1985 | -2.3328 | 0.00E+00 | CEBPD   | CCAAT/enhancer binding protein (C/EBP), delta [Source:HGNC Symbol;Acc:HGNC:1835]                                         |
| 3725  | 0.1893 | -2.4012 | 0.00E+00 | JUN     | jun proto-oncogene [Source:HGNC Symbol;Acc:HGNC:6204]                                                                    |
| 64651 | 0.2167 | -2.2064 | 0.00E+00 | CSRNP1  | cysteine-serine-rich nuclear protein 1 [Source:HGNC Symbol;Acc:HGNC:14300]                                               |
| 54206 | 0.2894 | -1.7887 | 0.00E+00 | ERRFI1  | ERBB receptor feedback inhibitor 1 [Source:HGNC Symbol;Acc:HGNC:18185]                                                   |
| 81575 | 0.0764 | -3.7101 | 0.00E+00 | APOLD1  | apolipoprotein L domain containing 1 [Source:HGNC Symbol;Acc:HGNC:25268]                                                 |
| 9314  | 0.2100 | -2.2512 | 0.00E+00 | KLF4    | Kruppel-like factor 4 (gut) [Source:HGNC Symbol;Acc:HGNC:6348]                                                           |



|        |        |         |          |         |                                                                                                        |
|--------|--------|---------|----------|---------|--------------------------------------------------------------------------------------------------------|
| 467    | 0.2170 | -2.2043 | 0.00E+00 | ATF3    | activating transcription factor 3<br>[Source:HGNC<br>Symbol;Acc:HGNC:785]                              |
| 5514   | 0.4808 | -1.0566 | 0.00E+00 | PPP1R10 | protein phosphatase 1, regulatory<br>subunit 10 [Source:HGNC<br>Symbol;Acc:HGNC:9284]                  |
| 10560  | 0.3069 | -1.7043 | 0.00E+00 | SLC19A2 | solute carrier family 19 (thiamine<br>transporter), member 2<br>[Source:HGNC<br>Symbol;Acc:HGNC:10938] |
| 25976  | 0.2754 | -1.8607 | 0.00E+00 | TIPARP  | TCDD-inducible poly(ADP-ribose)<br>polymerase [Source:HGNC<br>Symbol;Acc:HGNC:23696]                   |
| 5187   | 0.3029 | -1.7230 | 0.00E+00 | PER1    | period circadian clock 1<br>[Source:HGNC<br>Symbol;Acc:HGNC:8845]                                      |
| 359948 | 0.5742 | -0.8005 | 0.00E+00 | IRF2BP2 | interferon regulatory factor 2<br>binding protein 2 [Source:HGNC<br>Symbol;Acc:HGNC:21729]             |
| 3726   | 0.2641 | -1.9211 | 0.00E+00 | JUNB    | jun B proto-oncogene [Source:HGNC<br>Symbol;Acc:HGNC:6205]                                             |
| 51655  | 0.1563 | -2.6775 | 0.00E+00 | RASD1   | RAS, dexamethasone-induced 1<br>[Source:HGNC<br>Symbol;Acc:HGNC:15828]                                 |
| 7050   | 0.6053 | -0.7244 | 0.00E+00 | TGIF1   | TGFB-induced factor homeobox 1<br>[Source:HGNC<br>Symbol;Acc:HGNC:11776]                               |
| 55224  | 0.5089 | -0.9745 | 0.00E+00 | ETNK2   | ethanolamine kinase 2<br>[Source:HGNC<br>Symbol;Acc:HGNC:25575]                                        |
| 969    | 0.1282 | -2.9641 | 0.00E+00 | CD69    | CD69 molecule [Source:HGNC<br>Symbol;Acc:HGNC:1694]                                                    |
| 3164   | 0.1906 | -2.3915 | 0.00E+00 | NR4A1   | nuclear receptor subfamily 4, group<br>A, member 1 [Source:HGNC<br>Symbol;Acc:HGNC:7980]               |
| 1316   | 0.3491 | -1.5183 | 0.00E+00 | KLF6    | Kruppel-like factor 6 [Source:HGNC<br>Symbol;Acc:HGNC:2235]                                            |
| 8553   | 0.2864 | -1.8040 | 0.00E+00 | BHLHE40 | basic helix-loop-helix family,<br>member e40 [Source:HGNC<br>Symbol;Acc:HGNC:1046]                     |
| 8645   | 0.2906 | -1.7829 | 0.00E+00 | KCNK5   | potassium channel, two pore<br>domain subfamily K, member 5<br>[Source:HGNC<br>Symbol;Acc:HGNC:6280]   |
| 5144   | 0.5749 | -0.7986 | 0.00E+00 | PDE4D   | phosphodiesterase 4D, cAMP-<br>specific [Source:HGNC<br>Symbol;Acc:HGNC:8783]                          |
| 22822  | 0.3087 | -1.6955 | 0.00E+00 | PHLDA1  | pleckstrin homology-like domain,<br>family A, member 1 [Source:HGNC<br>Symbol;Acc:HGNC:8933]           |
| 7832   | 0.3816 | -1.3897 | 0.00E+00 | BTG2    | BTG family, member 2<br>[Source:HGNC<br>Symbol;Acc:HGNC:1131]                                          |
| 5105   | 0.2694 | -1.8922 | 0.00E+00 | PCK1    | phosphoenolpyruvate<br>carboxykinase 1 (soluble)<br>[Source:HGNC<br>Symbol;Acc:HGNC:8724]              |
| 5142   | 0.4300 | -1.2176 | 0.00E+00 | PDE4B   | phosphodiesterase 4B, cAMP-<br>specific [Source:HGNC<br>Symbol;Acc:HGNC:8781]                          |
| 388    | 0.5843 | -0.7752 | 0.00E+00 | RHOB    | ras homolog family member B<br>[Source:HGNC<br>Symbol;Acc:HGNC:668]                                    |

|        |        |         |          |         |                                                                                                                        |
|--------|--------|---------|----------|---------|------------------------------------------------------------------------------------------------------------------------|
| 4783   | 0.3036 | -1.7198 | 0.00E+00 | NFIL3   | nuclear factor, interleukin 3 regulated [Source:HGNC Symbol;Acc:HGNC:7787]                                             |
| 9099   | 0.5444 | -0.8773 | 0.00E+00 | USP2    | ubiquitin specific peptidase 2 [Source:HGNC Symbol;Acc:HGNC:12618]                                                     |
| 10253  | 0.3354 | -1.5761 | 0.00E+00 | SPRY2   | sprouty homolog 2 (Drosophila) [Source:HGNC Symbol;Acc:HGNC:11270]                                                     |
| 5166   | 0.2532 | -1.9815 | 0.00E+00 | PK4     | pyruvate dehydrogenase kinase, isozyme 4 [Source:HGNC Symbol;Acc:HGNC:8812]                                            |
| 65997  | 0.4087 | -1.2909 | 0.00E+00 | RASL11B | RAS-like, family 11, member B [Source:HGNC Symbol;Acc:HGNC:23804]                                                      |
| 4128   | 0.4972 | -1.0082 | 0.00E+00 | MAOA    | monoamine oxidase A [Source:HGNC Symbol;Acc:HGNC:6833]                                                                 |
| 687    | 0.4424 | -1.1764 | 0.00E+00 | KLF9    | Kruppel-like factor 9 [Source:HGNC Symbol;Acc:HGNC:1123]                                                               |
| 57669  | 0.6630 | -0.5928 | 0.00E+00 | EPB41L5 | erythrocyte membrane protein band 4.1 like 5 [Source:HGNC Symbol;Acc:HGNC:19819]                                       |
| 84913  | 0.3292 | -1.6031 | 0.00E+00 | ATOH8   | atonal homolog 8 (Drosophila) [Source:HGNC Symbol;Acc:HGNC:24126]                                                      |
| 157506 | 0.4576 | -1.1278 | 0.00E+00 | RDH10   | retinol dehydrogenase 10 (all-trans) [Source:HGNC Symbol;Acc:HGNC:19975]                                               |
| 11082  | 0.2145 | -2.2210 | 0.00E+00 | ESM1    | endothelial cell-specific molecule 1 [Source:HGNC Symbol;Acc:HGNC:3466]                                                |
| 1428   | 0.3467 | -1.5281 | 0.00E+00 | CRYM    | crystallin, mu [Source:HGNC Symbol;Acc:HGNC:2418]                                                                      |
| 84612  | 0.6036 | -0.7282 | 0.00E+00 | PARD6B  | par-6 family cell polarity regulator beta [Source:HGNC Symbol;Acc:HGNC:16245]                                          |
| 64332  | 0.2857 | -1.8072 | 0.00E+00 | NFKBIZ  | nuclear factor of kappa light polypeptide gene enhancer in B-cells inhibitor, zeta [Source:HGNC Symbol;Acc:HGNC:29805] |
| 2938   | 0.2334 | -2.0991 | 0.00E+00 | GSTA1   | glutathione S-transferase alpha 1 [Source:HGNC Symbol;Acc:HGNC:4626]                                                   |
| 4739   | 0.5139 | -0.9605 | 0.00E+00 | NEDD9   | neural precursor cell expressed, developmentally down-regulated 9 [Source:HGNC Symbol;Acc:HGNC:7733]                   |
| 3727   | 0.6388 | -0.6465 | 0.00E+00 | JUND    | jun D proto-oncogene [Source:HGNC Symbol;Acc:HGNC:6206]                                                                |
| 131034 | 0.3384 | -1.5633 | 0.00E+00 | CPNE4   | copine IV [Source:HGNC Symbol;Acc:HGNC:2317]                                                                           |
| 201164 | 0.4391 | -1.1875 | 0.00E+00 | PLD6    | phospholipase D family, member 6 [Source:HGNC Symbol;Acc:HGNC:30447]                                                   |
| 6584   | 0.5388 | -0.8921 | 0.00E+00 | SLC22A5 | solute carrier family 22 (organic cation/carnitine transporter), member 5 [Source:HGNC Symbol;Acc:HGNC:10969]          |
| 65124  | 0.3730 | -1.4228 | 0.00E+00 | SOWAHC  | sosondowah ankyrin repeat domain family member C [Source:HGNC Symbol;Acc:HGNC:26149]                                   |
| 205    | 0.4391 | -1.1875 | 0.00E+00 | AK4     | adenylate kinase 4 [Source:HGNC Symbol;Acc:HGNC:363]                                                                   |

|        |        |         |          |          |                                                                                                                    |
|--------|--------|---------|----------|----------|--------------------------------------------------------------------------------------------------------------------|
| 55422  | 0.3212 | -1.6386 | 0.00E+00 | ZNF331   | zinc finger protein 331<br>[Source:HGNC<br>Symbol;Acc:HGNC:15489]                                                  |
| 3621   | 0.5172 | -0.9511 | 0.00E+00 | ING1     | inhibitor of growth family, member<br>1 [Source:HGNC<br>Symbol;Acc:HGNC:6062]                                      |
| 3242   | 0.2060 | -2.2796 | 0.00E+00 | HPD      | 4-hydroxyphenylpyruvate<br>dioxygenase [Source:HGNC<br>Symbol;Acc:HGNC:5147]                                       |
| 23014  | 0.6016 | -0.7332 | 0.00E+00 | FBXO21   | F-box protein 21 [Source:HGNC<br>Symbol;Acc:HGNC:13592]                                                            |
| 22941  | 0.5513 | -0.8590 | 0.00E+00 | SHANK2   | SH3 and multiple ankyrin repeat<br>domains 2 [Source:HGNC<br>Symbol;Acc:HGNC:14295]                                |
| 4036   | 0.4056 | -1.3020 | 0.00E+00 | LRP2     | low density lipoprotein receptor-<br>related protein 2 [Source:HGNC<br>Symbol;Acc:HGNC:6694]                       |
| 4616   | 0.3538 | -1.4991 | 0.00E+00 | GADD45B  | growth arrest and DNA-damage-<br>inducible, beta [Source:HGNC<br>Symbol;Acc:HGNC:4096]                             |
| 651746 | 0.3753 | -1.4140 | 0.00E+00 | ANKRD33B | ankyrin repeat domain 33B<br>[Source:HGNC<br>Symbol;Acc:HGNC:35240]                                                |
| 85415  | 0.5495 | -0.8637 | 0.00E+00 | RHPN2    | rhophilin, Rho GTPase binding<br>protein 2 [Source:HGNC<br>Symbol;Acc:HGNC:19974]                                  |
| 4329   | 0.4673 | -1.0977 | 0.00E+00 | ALDH6A1  | aldehyde dehydrogenase 6 family,<br>member A1 [Source:HGNC<br>Symbol;Acc:HGNC:7179]                                |
| 134147 | 0.4228 | -1.2419 | 0.00E+00 | CMBL     | carboxymethylenebutenolidase<br>homolog (Pseudomonas)<br>[Source:HGNC<br>Symbol;Acc:HGNC:25090]                    |
| 1644   | 0.4483 | -1.1576 | 0.00E+00 | DDC      | dopa decarboxylase (aromatic L-<br>amino acid decarboxylase)<br>[Source:HGNC<br>Symbol;Acc:HGNC:2719]              |
| 51733  | 0.5176 | -0.9502 | 0.00E+00 | UPB1     | ureidopropionase, beta<br>[Source:HGNC<br>Symbol;Acc:HGNC:16297]                                                   |
| 384    | 0.4377 | -1.1921 | 0.00E+00 | ARG2     | arginase 2 [Source:HGNC<br>Symbol;Acc:HGNC:664]                                                                    |
| 28970  | 0.4989 | -1.0031 | 0.00E+00 | C11ORF54 | chromosome 11 open reading frame<br>54 [Source:HGNC<br>Symbol;Acc:HGNC:30204]                                      |
| 4257   | 0.3779 | -1.4039 | 0.00E+00 | MGST1    | microsomal glutathione S-<br>transferase 1 [Source:HGNC<br>Symbol;Acc:HGNC:7061]                                   |
| 1051   | 0.3274 | -1.6108 | 0.00E+00 | CEBPB    | CCAAT/enhancer binding protein<br>(C/EBP), beta [Source:HGNC<br>Symbol;Acc:HGNC:1834]                              |
| 256764 | 0.4644 | -1.1065 | 0.00E+00 | WDR72    | WD repeat domain 72<br>[Source:HGNC<br>Symbol;Acc:HGNC:26790]                                                      |
| 79799  | 0.3682 | -1.4413 | 0.00E+00 | UGT2A3   | UDP glucuronosyltransferase 2<br>family, polypeptide A3<br>[Source:HGNC<br>Symbol;Acc:HGNC:28528]                  |
| 3400   | 0.4884 | -1.0338 | 0.00E+00 | ID4      | inhibitor of DNA binding 4,<br>dominant negative helix-loop-helix<br>protein [Source:HGNC<br>Symbol;Acc:HGNC:5363] |

|        |        |         |          |         |                                                                                                                         |
|--------|--------|---------|----------|---------|-------------------------------------------------------------------------------------------------------------------------|
| 130013 | 0.2678 | -1.9005 | 0.00E+00 | ACMSD   | aminocarboxymuconate semialdehyde decarboxylase [Source:HGNC Symbol;Acc:HGNC:19288]                                     |
| 11136  | 0.2670 | -1.9052 | 0.00E+00 | SLC7A9  | solute carrier family 7 (amino acid transporter light chain, bo,+ system), member 9 [Source:HGNC Symbol;Acc:HGNC:11067] |
| 7128   | 0.2492 | -2.0044 | 0.00E+00 | TNFAIP3 | tumor necrosis factor, alpha-induced protein 3 [Source:HGNC Symbol;Acc:HGNC:11896]                                      |
| 2355   | 0.4473 | -1.1607 | 0.00E+00 | FOSL2   | FOS-like antigen 2 [Source:HGNC Symbol;Acc:HGNC:3798]                                                                   |
| 4792   | 0.4976 | -1.0071 | 0.00E+00 | NFKBIA  | nuclear factor of kappa light polypeptide gene enhancer in B-cells inhibitor, alpha [Source:HGNC Symbol;Acc:HGNC:7797]  |
| 3337   | 0.1854 | -2.4315 | 0.00E+00 | DNAJB1  | DnaJ (Hsp40) homolog, subfamily B, member 1 [Source:HGNC Symbol;Acc:HGNC:5270]                                          |
| 1831   | 0.4687 | -1.0931 | 0.00E+00 | TSC22D3 | TSC22 domain family, member 3 [Source:HGNC Symbol;Acc:HGNC:3051]                                                        |
| 26353  | 0.5581 | -0.8415 | 0.00E+00 | HSPB8   | heat shock 22kDa protein 8 [Source:HGNC Symbol;Acc:HGNC:30171]                                                          |
| 64577  | 0.3431 | -1.5432 | 0.00E+00 | ALDH8A1 | aldehyde dehydrogenase 8 family, member A1 [Source:HGNC Symbol;Acc:HGNC:15471]                                          |
| 2168   | 0.2946 | -1.7634 | 0.00E+00 | FABP1   | fatty acid binding protein 1, liver [Source:HGNC Symbol;Acc:HGNC:3555]                                                  |
| 6470   | 0.4402 | -1.1839 | 0.00E+00 | SHMT1   | serine hydroxymethyltransferase 1 (soluble) [Source:HGNC Symbol;Acc:HGNC:10850]                                         |
| 51361  | 0.5777 | -0.7917 | 0.00E+00 | HOOK1   | hook microtubule-tethering protein 1 [Source:HGNC Symbol;Acc:HGNC:19884]                                                |
| 23743  | 0.3883 | -1.3648 | 0.00E+00 | BHMT2   | betaine--homocysteine S-methyltransferase 2 [Source:HGNC Symbol;Acc:HGNC:1048]                                          |
| 4170   | 0.5567 | -0.8450 | 0.00E+00 | MCL1    | myeloid cell leukemia 1 [Source:HGNC Symbol;Acc:HGNC:6943]                                                              |
| 6819   | 0.4466 | -1.1629 | 0.00E+00 | SULT1C2 | sulfotransferase family, cytosolic, 1C, member 2 [Source:HGNC Symbol;Acc:HGNC:11456]                                    |
| 287    | 0.4322 | -1.2103 | 0.00E+00 | ANK2    | ankyrin 2, neuronal [Source:HGNC Symbol;Acc:HGNC:493]                                                                   |
| 10370  | 0.5868 | -0.7691 | 0.00E+00 | CITED2  | Cbp/p300-interacting transactivator, with Glu/Asp-rich carboxy-terminal domain, 2 [Source:HGNC Symbol;Acc:HGNC:1987]    |
| 445    | 0.4681 | -1.0951 | 0.00E+00 | ASS1    | argininosuccinate synthase 1 [Source:HGNC Symbol;Acc:HGNC:758]                                                          |
| 23764  | 0.2343 | -2.0934 | 0.00E+00 | MAFF    | v-maf avian musculoaponeurotic fibrosarcoma oncogene homolog F [Source:HGNC Symbol;Acc:HGNC:6780]                       |

|        |        |         |          |           |                                                                                                 |
|--------|--------|---------|----------|-----------|-------------------------------------------------------------------------------------------------|
| 23767  | 0.6124 | -0.7074 | 0.00E+00 | FLRT3     | fibronectin leucine rich transmembrane protein 3 [Source:HGNC Symbol;Acc:HGNC:3762]             |
| 116154 | 0.2152 | -2.2160 | 0.00E+00 | PHACTR3   | phosphatase and actin regulator 3 [Source:HGNC Symbol;Acc:HGNC:15833]                           |
| 23414  | 0.5319 | -0.9108 | 0.00E+00 | ZFPM2     | zinc finger protein, FOG family member 2 [Source:HGNC Symbol;Acc:HGNC:16700]                    |
| 8382   | 0.5658 | -0.8217 | 0.00E+00 | NME5      | NME/NM23 family member 5 [Source:HGNC Symbol;Acc:HGNC:7853]                                     |
| 343990 | 0.6096 | -0.7141 | 0.00E+00 | KIAA1211L | KIAA1211-like [Source:HGNC Symbol;Acc:HGNC:33454]                                               |
| 26751  | 0.6112 | -0.7104 | 0.00E+00 | SH3YL1    | SH3 and SYLF domain containing 1 [Source:HGNC Symbol;Acc:HGNC:29546]                            |
| 50507  | 0.4974 | -1.0074 | 0.00E+00 | NOX4      | NADPH oxidase 4 [Source:HGNC Symbol;Acc:HGNC:7891]                                              |
| 229    | 0.3540 | -1.4980 | 0.00E+00 | ALDOB     | aldolase B, fructose-bisphosphate [Source:HGNC Symbol;Acc:HGNC:417]                             |
| 10140  | 0.6571 | -0.6058 | 0.00E+00 | TOB1      | transducer of ERBB2, 1 [Source:HGNC Symbol;Acc:HGNC:11979]                                      |
| 2104   | 0.4965 | -1.0102 | 0.00E+00 | ESRRG     | estrogen-related receptor gamma [Source:HGNC Symbol;Acc:HGNC:3474]                              |
| 9476   | 0.4648 | -1.1054 | 0.00E+00 | NAPSA     | napsin A aspartic peptidase [Source:HGNC Symbol;Acc:HGNC:13395]                                 |
| 84803  | 0.3514 | -1.5088 | 0.00E+00 | AGPAT9    | 1-acylglycerol-3-phosphate O-acyltransferase 9 [Source:HGNC Symbol;Acc:HGNC:28157]              |
| 11001  | 0.2694 | -1.8924 | 0.00E+00 | SLC27A2   | solute carrier family 27 (fatty acid transporter), member 2 [Source:HGNC Symbol;Acc:HGNC:10996] |
| 5264   | 0.6013 | -0.7338 | 0.00E+00 | PHYH      | phytanoyl-CoA 2-hydroxylase [Source:HGNC Symbol;Acc:HGNC:8940]                                  |
| 123    | 0.5365 | -0.8983 | 0.00E+00 | PLIN2     | perilipin 2 [Source:HGNC Symbol;Acc:HGNC:248]                                                   |
| 3795   | 0.4746 | -1.0752 | 0.00E+00 | KHK       | ketoheksokinase (fructokinase) [Source:HGNC Symbol;Acc:HGNC:6315]                               |
| 9531   | 0.4336 | -1.2055 | 0.00E+00 | BAG3      | BCL2-associated athanogene 3 [Source:HGNC Symbol;Acc:HGNC:939]                                  |
| 1154   | 0.6021 | -0.7319 | 0.00E+00 | CISH      | cytokine inducible SH2-containing protein [Source:HGNC Symbol;Acc:HGNC:1984]                    |
| 118980 | 0.5362 | -0.8990 | 0.00E+00 | SFXN2     | sideroflexin 2 [Source:HGNC Symbol;Acc:HGNC:16086]                                              |
| 1807   | 0.2574 | -1.9579 | 0.00E+00 | DPYS      | dihydropyrimidinase [Source:HGNC Symbol;Acc:HGNC:3013]                                          |
| 7743   | 0.4617 | -1.1148 | 0.00E+00 | ZNF189    | zinc finger protein 189 [Source:HGNC Symbol;Acc:HGNC:12980]                                     |
| 64081  | 0.4685 | -1.0940 | 0.00E+00 | PBLD      | phenazine biosynthesis-like protein domain containing [Source:HGNC Symbol;Acc:HGNC:23301]       |

|        |        |         |          |          |                                                                                                                               |
|--------|--------|---------|----------|----------|-------------------------------------------------------------------------------------------------------------------------------|
| 401548 | 0.6287 | -0.6696 | 0.00E+00 | SNX30    | sorting nexin family member 30<br>[Source:HGNC<br>Symbol;Acc:HGNC:23685]                                                      |
| 23428  | 0.6526 | -0.6157 | 0.00E+00 | SLC7A8   | solute carrier family 7 (amino acid<br>transporter light chain, L system),<br>member 8 [Source:HGNC<br>Symbol;Acc:HGNC:11066] |
| 7071   | 0.5308 | -0.9138 | 0.00E+00 | KLF10    | Kruppel-like factor 10<br>[Source:HGNC<br>Symbol;Acc:HGNC:11810]                                                              |
| 4494   | 0.4827 | -1.0509 | 0.00E+00 | MT1F     | metallothionein 1F [Source:HGNC<br>Symbol;Acc:HGNC:7398]                                                                      |
| 169693 | 0.4213 | -1.2471 | 0.00E+00 | TMEM252  | transmembrane protein 252<br>[Source:HGNC<br>Symbol;Acc:HGNC:28537]                                                           |
| 51585  | 0.5764 | -0.7950 | 0.00E+00 | PCF11    | PCF11 cleavage and<br>polyadenylation factor subunit<br>[Source:HGNC<br>Symbol;Acc:HGNC:30097]                                |
| 1848   | 0.4868 | -1.0385 | 0.00E+00 | DUSP6    | dual specificity phosphatase 6<br>[Source:HGNC<br>Symbol;Acc:HGNC:3072]                                                       |
| 114789 | 0.5168 | -0.9523 | 0.00E+00 | SLC25A25 | solute carrier family 25<br>(mitochondrial carrier; phosphate<br>carrier), member 25 [Source:HGNC<br>Symbol;Acc:HGNC:20663]   |
| 3081   | 0.4639 | -1.1080 | 0.00E+00 | HGD      | homogentisate 1,2-dioxygenase<br>[Source:HGNC<br>Symbol;Acc:HGNC:4892]                                                        |
| 64762  | 0.6435 | -0.6360 | 0.00E+00 | GAREM    | GRB2 associated, regulator of<br>MAPK1 [Source:HGNC<br>Symbol;Acc:HGNC:26136]                                                 |
| 54541  | 0.3512 | -1.5098 | 0.00E+00 | DDIT4    | DNA-damage-inducible transcript 4<br>[Source:HGNC<br>Symbol;Acc:HGNC:24944]                                                   |
| 25925  | 0.6059 | -0.7228 | 0.00E+00 | ZNF521   | zinc finger protein 521<br>[Source:HGNC<br>Symbol;Acc:HGNC:24605]                                                             |
| 6382   | 0.4640 | -1.1077 | 0.00E+00 | SDC1     | syndecan 1 [Source:HGNC<br>Symbol;Acc:HGNC:10658]                                                                             |
| 353189 | 0.3888 | -1.3629 | 0.00E+00 | SLCO4C1  | solute carrier organic anion<br>transporter family, member 4C1<br>[Source:HGNC<br>Symbol;Acc:HGNC:23612]                      |
| 130271 | 0.6108 | -0.7113 | 0.00E+00 | PLEKHH2  | pleckstrin homology domain<br>containing, family H (with MyTH4<br>domain) member 2 [Source:HGNC<br>Symbol;Acc:HGNC:30506]     |
| 4501   | 0.3985 | -1.3274 | 0.00E+00 | MT1X     | metallothionein 1X [Source:HGNC<br>Symbol;Acc:HGNC:7405]                                                                      |
| 57393  | 0.3376 | -1.5665 | 0.00E+00 | TMEM27   | transmembrane protein 27<br>[Source:HGNC<br>Symbol;Acc:HGNC:29437]                                                            |
| 163882 | 0.6367 | -0.6512 | 0.00E+00 | CNST     | consortin, connexin sorting protein<br>[Source:HGNC<br>Symbol;Acc:HGNC:26486]                                                 |
| 10158  | 0.5403 | -0.8883 | 0.00E+00 | PDZK1IP1 | PDZK1 interacting protein 1<br>[Source:HGNC<br>Symbol;Acc:HGNC:16887]                                                         |
| 2878   | 0.5718 | -0.8063 | 0.00E+00 | GPX3     | glutathione peroxidase 3<br>[Source:HGNC<br>Symbol;Acc:HGNC:4555]                                                             |
| 55937  | 0.4346 | -1.2023 | 0.00E+00 | APOM     | apolipoprotein M [Source:HGNC<br>Symbol;Acc:HGNC:13916]                                                                       |

|        |        |         |          |          |                                                                                                                     |
|--------|--------|---------|----------|----------|---------------------------------------------------------------------------------------------------------------------|
| 1410   | 0.6670 | -0.5843 | 0.00E+00 | CRYAB    | crystallin, alpha B [Source:HGNC Symbol;Acc:HGNC:2389]                                                              |
| 23645  | 0.4484 | -1.1571 | 0.00E+00 | PPP1R15A | protein phosphatase 1, regulatory subunit 15A [Source:HGNC Symbol;Acc:HGNC:14375]                                   |
| 80318  | 0.5992 | -0.7389 | 0.00E+00 | GKAP1    | G kinase anchoring protein 1 [Source:HGNC Symbol;Acc:HGNC:17496]                                                    |
| 83758  | 0.4311 | -1.2139 | 0.00E+00 | RBP5     | retinol binding protein 5, cellular [Source:HGNC Symbol;Acc:HGNC:15847]                                             |
| 2203   | 0.4109 | -1.2832 | 0.00E+00 | FBP1     | fructose-1,6-bisphosphatase 1 [Source:HGNC Symbol;Acc:HGNC:3606]                                                    |
| 79960  | 0.6601 | -0.5993 | 0.00E+00 | JADE1    | jade family PHD finger 1 [Source:HGNC Symbol;Acc:HGNC:30027]                                                        |
| 57291  | 0.6263 | -0.6751 | 0.00E+00 | DANCR    | differentiation antagonizing non-protein coding RNA [Source:HGNC Symbol;Acc:HGNC:28964]                             |
| 84919  | 0.5396 | -0.8899 | 0.00E+00 | PPP1R15B | protein phosphatase 1, regulatory subunit 15B [Source:HGNC Symbol;Acc:HGNC:14951]                                   |
| 7465   | 0.6206 | -0.6883 | 0.00E+00 | WEE1     | WEE1 G2 checkpoint kinase [Source:HGNC Symbol;Acc:HGNC:12761]                                                       |
| 642273 | 0.5528 | -0.8552 | 0.00E+00 | FAM110C  | family with sequence similarity 110, member C [Source:HGNC Symbol;Acc:HGNC:33340]                                   |
| 11080  | 0.5733 | -0.8026 | 0.00E+00 | DNAJB4   | DnaJ (Hsp40) homolog, subfamily B, member 4 [Source:HGNC Symbol;Acc:HGNC:14886]                                     |
| 7803   | 0.6658 | -0.5868 | 0.00E+00 | PTP4A1   | protein tyrosine phosphatase type IVA, member 1 [Source:HGNC Symbol;Acc:HGNC:9634]                                  |
| 220963 | 0.3408 | -1.5532 | 0.00E+00 | SLC16A9  | solute carrier family 16, member 9 [Source:HGNC Symbol;Acc:HGNC:23520]                                              |
| 1195   | 0.5341 | -0.9048 | 0.00E+00 | CLK1     | CDC-like kinase 1 [Source:HGNC Symbol;Acc:HGNC:2068]                                                                |
| 3033   | 0.6480 | -0.6260 | 0.00E+00 | HADH     | hydroxyacyl-CoA dehydrogenase [Source:HGNC Symbol;Acc:HGNC:4799]                                                    |
| 51084  | 0.5641 | -0.8261 | 0.00E+00 | CRYL1    | crystallin, lambda 1 [Source:HGNC Symbol;Acc:HGNC:18246]                                                            |
| 27106  | 0.2741 | -1.8674 | 0.00E+00 | ARRDC2   | arrestin domain containing 2 [Source:HGNC Symbol;Acc:HGNC:25225]                                                    |
| 3491   | 0.4272 | -1.2269 | 0.00E+00 | CYR61    | cysteine-rich, angiogenic inducer, 61 [Source:HGNC Symbol;Acc:HGNC:2654]                                            |
| 10083  | 0.5099 | -0.9718 | 0.00E+00 | USH1C    | Usher syndrome 1C [Source:HGNC Symbol;Acc:HGNC:12597]                                                               |
| 64849  | 0.4741 | -1.0766 | 0.00E+00 | SLC13A3  | solute carrier family 13 (sodium-dependent dicarboxylate transporter), member 3 [Source:HGNC Symbol;Acc:HGNC:14430] |
| 8671   | 0.4674 | -1.0971 | 0.00E+00 | SLC4A4   | solute carrier family 4 (sodium bicarbonate cotransporter), member 4 [Source:HGNC Symbol;Acc:HGNC:11030]            |

|        |        |         |          |           |                                                                                                                                       |
|--------|--------|---------|----------|-----------|---------------------------------------------------------------------------------------------------------------------------------------|
| 29958  | 0.3874 | -1.3679 | 0.00E+00 | DMGDH     | dimethylglycine dehydrogenase<br>[Source:HGNC<br>Symbol;Acc:HGNC:24475]                                                               |
| 2805   | 0.5633 | -0.8281 | 0.00E+00 | GOT1      | glutamic-oxaloacetic transaminase<br>1, soluble [Source:HGNC<br>Symbol;Acc:HGNC:4432]                                                 |
| 10891  | 0.4759 | -1.0712 | 0.00E+00 | PPARGC1A  | peroxisome proliferator-activated<br>receptor gamma, coactivator 1<br>alpha [Source:HGNC<br>Symbol;Acc:HGNC:9237]                     |
| 9592   | 0.4796 | -1.0601 | 0.00E+00 | IER2      | immediate early response 2<br>[Source:HGNC<br>Symbol;Acc:HGNC:28871]                                                                  |
| 7430   | 0.6611 | -0.5971 | 0.00E+00 | EZR       | ezrin [Source:HGNC<br>Symbol;Acc:HGNC:12691]                                                                                          |
| 48     | 0.6223 | -0.6843 | 0.00E+00 | ACO1      | aconitase 1, soluble [Source:HGNC<br>Symbol;Acc:HGNC:117]                                                                             |
| 55586  | 0.2903 | -1.7842 | 0.00E+00 | MIOX      | myo-inositol oxygenase<br>[Source:HGNC<br>Symbol;Acc:HGNC:14522]                                                                      |
| 22981  | 0.6164 | -0.6980 | 0.00E+00 | NINL      | ninein-like [Source:HGNC<br>Symbol;Acc:HGNC:29163]                                                                                    |
| 36     | 0.6485 | -0.6247 | 0.00E+00 | ACADSB    | acyl-CoA dehydrogenase,<br>short/branched chain<br>[Source:HGNC<br>Symbol;Acc:HGNC:91]                                                |
| 8424   | 0.3554 | -1.4926 | 0.00E+00 | BBOX1     | butyrobetaine (gamma), 2-<br>oxoglutarate dioxygenase (gamma-<br>butyrobetaine hydroxylase) 1<br>[Source:HGNC<br>Symbol;Acc:HGNC:964] |
| 730091 | 0.6062 | -0.7222 | 0.00E+00 | LINC00886 | long intergenic non-protein coding<br>RNA 886 [Source:HGNC<br>Symbol;Acc:HGNC:48572]                                                  |
| 2690   | 0.6413 | -0.6410 | 0.00E+00 | GHR       | growth hormone receptor<br>[Source:HGNC<br>Symbol;Acc:HGNC:4263]                                                                      |
| 2628   | 0.3970 | -1.3328 | 0.00E+00 | GATM      | glycine amidinotransferase (L-<br>arginine:glycine<br>amidinotransferase) [Source:HGNC<br>Symbol;Acc:HGNC:4175]                       |
| 7512   | 0.3769 | -1.4079 | 0.00E+00 | XPNPEP2   | X-prolyl aminopeptidase<br>(aminopeptidase P) 2, membrane-<br>bound [Source:HGNC<br>Symbol;Acc:HGNC:12823]                            |
| 217    | 0.6496 | -0.6225 | 0.00E+00 | ALDH2     | aldehyde dehydrogenase 2 family<br>(mitochondrial) [Source:HGNC<br>Symbol;Acc:HGNC:404]                                               |
| 94234  | 0.3370 | -1.5691 | 0.00E+00 | FOXQ1     | forkhead box Q1 [Source:HGNC<br>Symbol;Acc:HGNC:20951]                                                                                |
| 6519   | 0.4661 | -1.1013 | 0.00E+00 | SLC3A1    | solute carrier family 3 (amino acid<br>transporter heavy chain), member 1<br>[Source:HGNC<br>Symbol;Acc:HGNC:11025]                   |
| 51268  | 0.3120 | -1.6804 | 0.00E+00 | PIPOX     | pipecolic acid oxidase<br>[Source:HGNC<br>Symbol;Acc:HGNC:17804]                                                                      |
| 132299 | 0.6474 | -0.6272 | 0.00E+00 | OCIAD2    | OCIA domain containing 2<br>[Source:HGNC<br>Symbol;Acc:HGNC:28685]                                                                    |
| 34     | 0.6635 | -0.5917 | 0.00E+00 | ACADM     | acyl-CoA dehydrogenase, C-4 to C-<br>12 straight chain [Source:HGNC<br>Symbol;Acc:HGNC:89]                                            |



|        |        |         |          |         |                                                                                                                                             |
|--------|--------|---------|----------|---------|---------------------------------------------------------------------------------------------------------------------------------------------|
| 160760 | 0.6659 | -0.5866 | 0.00E+00 | PPTC7   | PTC7 protein phosphatase homolog (S. cerevisiae) [Source:HGNC Symbol;Acc:HGNC:30695]                                                        |
| 29950  | 0.5018 | -0.9947 | 0.00E+00 | SERTAD1 | SERTA domain containing 1 [Source:HGNC Symbol;Acc:HGNC:17932]                                                                               |
| 1844   | 0.4078 | -1.2941 | 0.00E+00 | DUSP2   | dual specificity phosphatase 2 [Source:HGNC Symbol;Acc:HGNC:3068]                                                                           |
| 80311  | 0.6303 | -0.6658 | 0.00E+00 | KLHL15  | kelch-like family member 15 [Source:HGNC Symbol;Acc:HGNC:29347]                                                                             |
| 54790  | 0.6158 | -0.6995 | 0.00E+00 | TET2    | tet methylcytosine dioxygenase 2 [Source:HGNC Symbol;Acc:HGNC:25941]                                                                        |
| 8660   | 0.6568 | -0.6064 | 0.00E+00 | IRS2    | insulin receptor substrate 2 [Source:HGNC Symbol;Acc:HGNC:6126]                                                                             |
| 159963 | 0.3878 | -1.3667 | 0.00E+00 | SLC5A12 | solute carrier family 5 (sodium/monocarboxylate cotransporter), member 12 [Source:HGNC Symbol;Acc:HGNC:28750]                               |
| 10912  | 0.3904 | -1.3571 | 0.00E+00 | GADD45G | growth arrest and DNA-damage-inducible, gamma [Source:HGNC Symbol;Acc:HGNC:4097]                                                            |
| 23086  | 0.6339 | -0.6577 | 0.00E+00 | EXPH5   | exophilin 5 [Source:HGNC Symbol;Acc:HGNC:30578]                                                                                             |
| 5340   | 0.3398 | -1.5572 | 0.00E+00 | PLG     | plasminogen [Source:HGNC Symbol;Acc:HGNC:9071]                                                                                              |
| 3273   | 0.3999 | -1.3224 | 0.00E+00 | HRG     | histidine-rich glycoprotein [Source:HGNC Symbol;Acc:HGNC:5181]                                                                              |
| 10766  | 0.5099 | -0.9718 | 0.00E+00 | TOB2    | transducer of ERBB2, 2 [Source:HGNC Symbol;Acc:HGNC:11980]                                                                                  |
| 10249  | 0.3546 | -1.4957 | 0.00E+00 | GLYAT   | glycine-N-acyltransferase [Source:HGNC Symbol;Acc:HGNC:13734]                                                                               |
| 1800   | 0.4381 | -1.1906 | 0.00E+00 | DPEP1   | dipeptidase 1 (renal) [Source:HGNC Symbol;Acc:HGNC:3002]                                                                                    |
| 8864   | 0.6307 | -0.6649 | 0.00E+00 | PER2    | period circadian clock 2 [Source:HGNC Symbol;Acc:HGNC:8846]                                                                                 |
| 9356   | 0.4084 | -1.2918 | 0.00E+00 | SLC22A6 | solute carrier family 22 (organic anion transporter), member 6 [Source:HGNC Symbol;Acc:HGNC:10970]                                          |
| 6505   | 0.5513 | -0.8591 | 0.00E+00 | SLC1A1  | solute carrier family 1 (neuronal/epithelial high affinity glutamate transporter, system Xag), member 1 [Source:HGNC Symbol;Acc:HGNC:10939] |
| 3303   | 0.5786 | -0.7894 | 0.00E+00 | HSPA1A  | heat shock 70kDa protein 1A [Source:HGNC Symbol;Acc:HGNC:5232]                                                                              |
| 57733  | 0.3670 | -1.4463 | 0.00E+00 | GBA3    | glucosidase, beta, acid 3 (gene/pseudogene) [Source:HGNC Symbol;Acc:HGNC:19069]                                                             |
| 56704  | 0.5503 | -0.8617 | 0.00E+00 | JPH1    | junctionophilin 1 [Source:HGNC Symbol;Acc:HGNC:14201]                                                                                       |
| 83660  | 0.5137 | -0.9611 | 0.00E+00 | TLN2    | talin 2 [Source:HGNC Symbol;Acc:HGNC:15447]                                                                                                 |

|        |        |         |          |          |                                                                                                        |
|--------|--------|---------|----------|----------|--------------------------------------------------------------------------------------------------------|
| 10840  | 0.5266 | -0.9253 | 0.00E+00 | ALDH1L1  | aldehyde dehydrogenase 1 family, member L1 [Source:HGNC Symbol;Acc:HGNC:3978]                          |
| 55664  | 0.6366 | -0.6516 | 0.00E+00 | CDC37L1  | cell division cycle 37-like 1 [Source:HGNC Symbol;Acc:HGNC:17179]                                      |
| 8436   | 0.3870 | -1.3696 | 0.00E+00 | SDPR     | serum deprivation response [Source:HGNC Symbol;Acc:HGNC:10690]                                         |
| 90007  | 0.6527 | -0.6155 | 0.00E+00 | MIDN     | midnolin [Source:HGNC Symbol;Acc:HGNC:16298]                                                           |
| 284422 | 0.3947 | -1.3412 | 0.00E+00 | SMIM24   | small integral membrane protein 24 [Source:HGNC Symbol;Acc:HGNC:37244]                                 |
| 3613   | 0.4824 | -1.0516 | 0.00E+00 | IMPA2    | inositol(myo)-1(or 4)-monophosphatase 2 [Source:HGNC Symbol;Acc:HGNC:6051]                             |
| 57396  | 0.6103 | -0.7123 | 0.00E+00 | CLK4     | CDC-like kinase 4 [Source:HGNC Symbol;Acc:HGNC:13659]                                                  |
| 23235  | 0.6099 | -0.7134 | 0.00E+00 | SIK2     | salt-inducible kinase 2 [Source:HGNC Symbol;Acc:HGNC:21680]                                            |
| 9021   | 0.4206 | -1.2494 | 0.00E+00 | SOCS3    | suppressor of cytokine signaling 3 [Source:HGNC Symbol;Acc:HGNC:19391]                                 |
| 85450  | 0.4477 | -1.1593 | 0.00E+00 | ITPRIP   | inositol 1,4,5-trisphosphate receptor interacting protein [Source:HGNC Symbol;Acc:HGNC:29370]          |
| 8972   | 0.3957 | -1.3375 | 0.00E+00 | MGAM     | maltase-glucoamylase [Source:HGNC Symbol;Acc:HGNC:7043]                                                |
| 9317   | 0.6402 | -0.6434 | 0.00E+00 | PTER     | phosphotriesterase related [Source:HGNC Symbol;Acc:HGNC:9590]                                          |
| 23580  | 0.6626 | -0.5939 | 0.00E+00 | CDC42EP4 | CDC42 effector protein (Rho GTPase binding) 4 [Source:HGNC Symbol;Acc:HGNC:17147]                      |
| 4129   | 0.6616 | -0.5960 | 0.00E+00 | MAOB     | monoamine oxidase B [Source:HGNC Symbol;Acc:HGNC:6834]                                                 |
| 55151  | 0.6645 | -0.5897 | 0.00E+00 | TMEM38B  | transmembrane protein 38B [Source:HGNC Symbol;Acc:HGNC:25535]                                          |
| 11067  | 0.4077 | -1.2945 | 0.00E+00 | C10ORF10 | chromosome 10 open reading frame 10 [Source:HGNC Symbol;Acc:HGNC:23355]                                |
| 64902  | 0.3813 | -1.3909 | 0.00E+00 | AGXT2    | alanine--glyoxylate aminotransferase 2 [Source:HGNC Symbol;Acc:HGNC:14412]                             |
| 55244  | 0.3886 | -1.3635 | 0.00E+00 | SLC47A1  | solute carrier family 47 (multidrug and toxin extrusion), member 1 [Source:HGNC Symbol;Acc:HGNC:25588] |
| 79814  | 0.3805 | -1.3942 | 0.00E+00 | AGMAT    | agmatine ureohydrolase (agmatinase) [Source:HGNC Symbol;Acc:HGNC:18407]                                |
| 10053  | 0.6224 | -0.6841 | 0.00E+00 | AP1M2    | adaptor-related protein complex 1, mu 2 subunit [Source:HGNC Symbol;Acc:HGNC:558]                      |
| 9376   | 0.3963 | -1.3353 | 0.00E+00 | SLC22A8  | solute carrier family 22 (organic anion transporter), member 8 [Source:HGNC Symbol;Acc:HGNC:10972]     |

|        |        |         |          |         |                                                                                                                 |
|--------|--------|---------|----------|---------|-----------------------------------------------------------------------------------------------------------------|
| 5932   | 0.5403 | -0.8881 | 0.00E+00 | RBBP8   | retinoblastoma binding protein 8<br>[Source:HGNC<br>Symbol;Acc:HGNC:9891]                                       |
| 5357   | 0.5638 | -0.8267 | 0.00E+00 | PLS1    | plastin 1 [Source:HGNC<br>Symbol;Acc:HGNC:9090]                                                                 |
| 130    | 0.5159 | -0.9550 | 0.00E+00 | ADH6    | alcohol dehydrogenase 6 (class V)<br>[Source:HGNC<br>Symbol;Acc:HGNC:255]                                       |
| 4609   | 0.3208 | -1.6404 | 0.00E+00 | MYC     | v-myc avian myelocytomatosis viral<br>oncogene homolog [Source:HGNC<br>Symbol;Acc:HGNC:7553]                    |
| 58510  | 0.5344 | -0.9040 | 0.00E+00 | PRODH2  | proline dehydrogenase (oxidase) 2<br>[Source:HGNC<br>Symbol;Acc:HGNC:17325]                                     |
| 29953  | 0.5362 | -0.8993 | 0.00E+00 | TRHDE   | thyrotropin-releasing hormone<br>degrading enzyme [Source:HGNC<br>Symbol;Acc:HGNC:30748]                        |
| 27283  | 0.4350 | -1.2009 | 0.00E+00 | TINAG   | tubulointerstitial nephritis antigen<br>[Source:HGNC<br>Symbol;Acc:HGNC:14599]                                  |
| 1026   | 0.3883 | -1.3647 | 0.00E+00 | CDKN1A  | cyclin-dependent kinase inhibitor<br>1A (p21, Cip1) [Source:HGNC<br>Symbol;Acc:HGNC:1784]                       |
| 146802 | 0.4068 | -1.2978 | 0.00E+00 | SLC47A2 | solute carrier family 47 (multidrug<br>and toxin extrusion), member 2<br>[Source:HGNC<br>Symbol;Acc:HGNC:26439] |
| 87769  | 0.6183 | -0.6937 | 0.00E+00 | GGACT   | gamma-glutamylamine<br>cyclotransferase [Source:HGNC<br>Symbol;Acc:HGNC:25100]                                  |
| 4502   | 0.5765 | -0.7946 | 0.00E+00 | MT2A    | metallothionein 2A [Source:HGNC<br>Symbol;Acc:HGNC:7406]                                                        |
| 4291   | 0.5053 | -0.9849 | 0.00E+00 | MLF1    | myeloid leukemia factor 1<br>[Source:HGNC<br>Symbol;Acc:HGNC:7125]                                              |
| 5053   | 0.3498 | -1.5154 | 0.00E+00 | PAH     | phenylalanine hydroxylase<br>[Source:HGNC<br>Symbol;Acc:HGNC:8582]                                              |
| 92292  | 0.3914 | -1.3534 | 0.00E+00 | GLYATL1 | glycine-N-acyltransferase-like 1<br>[Source:HGNC<br>Symbol;Acc:HGNC:30519]                                      |
| 85027  | 0.4872 | -1.0375 | 0.00E+00 | SMIM3   | small integral membrane protein 3<br>[Source:HGNC<br>Symbol;Acc:HGNC:30248]                                     |
| 22936  | 0.5586 | -0.8401 | 0.00E+00 | ELL2    | elongation factor, RNA polymerase<br>II, 2 [Source:HGNC<br>Symbol;Acc:HGNC:17064]                               |
| 23087  | 0.5210 | -0.9406 | 0.00E+00 | TRIM35  | tripartite motif containing 35<br>[Source:HGNC<br>Symbol;Acc:HGNC:16285]                                        |
| 3773   | 0.5933 | -0.7532 | 0.00E+00 | KCNJ16  | potassium channel, inwardly<br>rectifying subfamily J, member 16<br>[Source:HGNC<br>Symbol;Acc:HGNC:6262]       |
| 2180   | 0.6689 | -0.5801 | 0.00E+00 | ACSL1   | acyl-CoA synthetase long-chain<br>family member 1 [Source:HGNC<br>Symbol;Acc:HGNC:3569]                         |
| 57821  | 0.6188 | -0.6924 | 0.00E+00 | CCDC181 | coiled-coil domain containing 181<br>[Source:HGNC<br>Symbol;Acc:HGNC:28051]                                     |
| 2710   | 0.5197 | -0.9441 | 0.00E+00 | GK      | glycerol kinase [Source:HGNC<br>Symbol;Acc:HGNC:4289]                                                           |

|        |        |         |          |         |                                                                                                            |
|--------|--------|---------|----------|---------|------------------------------------------------------------------------------------------------------------|
| 2326   | 0.3510 | -1.5105 | 0.00E+00 | FMO1    | flavin containing monooxygenase 1<br>[Source:HGNC<br>Symbol;Acc:HGNC:3769]                                 |
| 390    | 0.5955 | -0.7478 | 0.00E+00 | RND3    | Rho family GTPase 3 [Source:HGNC<br>Symbol;Acc:HGNC:671]                                                   |
| 3570   | 0.4814 | -1.0545 | 0.00E+00 | IL6R    | interleukin 6 receptor<br>[Source:HGNC<br>Symbol;Acc:HGNC:6019]                                            |
| 8029   | 0.3729 | -1.4230 | 0.00E+00 | CUBN    | cubilin (intrinsic factor-cobalamin<br>receptor) [Source:HGNC<br>Symbol;Acc:HGNC:2548]                     |
| 5184   | 0.6080 | -0.7177 | 0.00E+00 | PEPD    | peptidase D [Source:HGNC<br>Symbol;Acc:HGNC:8840]                                                          |
| 9920   | 0.6695 | -0.5788 | 0.00E+00 | KBTBD11 | kelch repeat and BTB (POZ) domain<br>containing 11 [Source:HGNC<br>Symbol;Acc:HGNC:29104]                  |
| 171425 | 0.6502 | -0.6210 | 0.00E+00 | CLYBL   | citrate lyase beta like [Source:HGNC<br>Symbol;Acc:HGNC:18355]                                             |
| 10247  | 0.4931 | -1.0201 | 0.00E+00 | HRSP12  | heat-responsive protein 12<br>[Source:HGNC<br>Symbol;Acc:HGNC:16897]                                       |
| 23221  | 0.6439 | -0.6352 | 0.00E+00 | RHOBTB2 | Rho-related BTB domain containing<br>2 [Source:HGNC<br>Symbol;Acc:HGNC:18756]                              |
| 60370  | 0.5889 | -0.7640 | 0.00E+00 | AVPI1   | arginine vasopressin-induced 1<br>[Source:HGNC<br>Symbol;Acc:HGNC:30898]                                   |
| 1610   | 0.4577 | -1.1276 | 0.00E+00 | DAO     | D-amino-acid oxidase [Source:HGNC<br>Symbol;Acc:HGNC:2671]                                                 |
| 94081  | 0.6275 | -0.6724 | 0.00E+00 | SFXN1   | sideroflexin 1 [Source:HGNC<br>Symbol;Acc:HGNC:16085]                                                      |
| 116842 | 0.5630 | -0.8289 | 0.00E+00 | LEAP2   | liver expressed antimicrobial<br>peptide 2 [Source:HGNC<br>Symbol;Acc:HGNC:29571]                          |
| 183    | 0.4127 | -1.2769 | 0.00E+00 | AGT     | angiotensinogen (serpin peptidase<br>inhibitor, clade A, member 8)<br>[Source:HGNC<br>Symbol;Acc:HGNC:333] |
| 3772   | 0.4828 | -1.0506 | 0.00E+00 | KCNJ15  | potassium channel, inwardly<br>rectifying subfamily J, member 15<br>[Source:HGNC<br>Symbol;Acc:HGNC:6261]  |
| 9027   | 0.3774 | -1.4059 | 0.00E+00 | NAT8    | N-acetyltransferase 8 (GCN5-<br>related, putative) [Source:HGNC<br>Symbol;Acc:HGNC:18069]                  |
| 118471 | 0.5458 | -0.8736 | 0.00E+00 | PRAP1   | proline-rich acidic protein 1<br>[Source:HGNC<br>Symbol;Acc:HGNC:23304]                                    |
| 635    | 0.4131 | -1.2754 | 0.00E+00 | BHMT    | betaine--homocysteine S-<br>methyltransferase [Source:HGNC<br>Symbol;Acc:HGNC:1047]                        |
| 91694  | 0.6012 | -0.7341 | 0.00E+00 | LONRF1  | LON peptidase N-terminal domain<br>and ring finger 1 [Source:HGNC<br>Symbol;Acc:HGNC:26302]                |
| 6299   | 0.6308 | -0.6648 | 0.00E+00 | SALL1   | spalt-like transcription factor 1<br>[Source:HGNC<br>Symbol;Acc:HGNC:10524]                                |
| 203328 | 0.6439 | -0.6350 | 0.00E+00 | SUSD3   | sushi domain containing 3<br>[Source:HGNC<br>Symbol;Acc:HGNC:28391]                                        |
| 55777  | 0.6693 | -0.5793 | 0.00E+00 | MBD5    | methyl-CpG binding domain protein<br>5 [Source:HGNC<br>Symbol;Acc:HGNC:20444]                              |

|        |        |         |          |         |                                                                                                          |
|--------|--------|---------|----------|---------|----------------------------------------------------------------------------------------------------------|
| 79589  | 0.5257 | -0.9276 | 0.00E+00 | RNF128  | ring finger protein 128, E3 ubiquitin protein ligase [Source:HGNC Symbol;Acc:HGNC:21153]                 |
| 340024 | 0.5414 | -0.8851 | 0.00E+00 | SLC6A19 | solute carrier family 6 (neutral amino acid transporter), member 19 [Source:HGNC Symbol;Acc:HGNC:27960]  |
| 83992  | 0.6308 | -0.6647 | 0.00E+00 | CTTNBP2 | cortactin binding protein 2 [Source:HGNC Symbol;Acc:HGNC:15679]                                          |
| 957    | 0.5545 | -0.8507 | 0.00E+00 | ENTPD5  | ectonucleoside triphosphate diphosphohydrolase 5 [Source:HGNC Symbol;Acc:HGNC:3367]                      |
| 23761  | 0.6619 | -0.5953 | 0.00E+00 | PISD    | phosphatidylserine decarboxylase [Source:HGNC Symbol;Acc:HGNC:8999]                                      |
| 6540   | 0.6042 | -0.7269 | 0.00E+00 | SLC6A13 | solute carrier family 6 (neurotransmitter transporter), member 13 [Source:HGNC Symbol;Acc:HGNC:11046]    |
| 29126  | 0.6162 | -0.6985 | 0.00E+00 | CD274   | CD274 molecule [Source:HGNC Symbol;Acc:HGNC:17635]                                                       |
| 3304   | 0.3067 | -1.7052 | 0.00E+00 | HSPA1B  | heat shock 70kDa protein 1B [Source:HGNC Symbol;Acc:HGNC:5233]                                           |
| 5577   | 0.6376 | -0.6493 | 0.00E+00 | PRKAR2B | protein kinase, cAMP-dependent, regulatory, type II, beta [Source:HGNC Symbol;Acc:HGNC:9392]             |
| 10103  | 0.4910 | -1.0261 | 0.00E+00 | TSPAN1  | tetraspanin 1 [Source:HGNC Symbol;Acc:HGNC:20657]                                                        |
| 22977  | 0.5154 | -0.9563 | 0.00E+00 | AKR7A3  | aldo-keto reductase family 7, member A3 (aflatoxin aldehyde reductase) [Source:HGNC Symbol;Acc:HGNC:390] |
| 58480  | 0.6210 | -0.6872 | 0.00E+00 | RHOU    | ras homolog family member U [Source:HGNC Symbol;Acc:HGNC:17794]                                          |
| 1645   | 0.4561 | -1.1324 | 0.00E+00 | AKR1C1  | aldo-keto reductase family 1, member C1 [Source:HGNC Symbol;Acc:HGNC:384]                                |
| 80176  | 0.5242 | -0.9317 | 0.00E+00 | SPSB1   | splA/ryanodine receptor domain and SOCS box containing 1 [Source:HGNC Symbol;Acc:HGNC:30628]             |
| 91860  | 0.6140 | -0.7036 | 0.00E+00 | CALML4  | calmodulin-like 4 [Source:HGNC Symbol;Acc:HGNC:18445]                                                    |
| 5106   | 0.5681 | -0.8158 | 0.00E+00 | PCK2    | phosphoenolpyruvate carboxykinase 2 (mitochondrial) [Source:HGNC Symbol;Acc:HGNC:8725]                   |
| 222484 | 0.6022 | -0.7318 | 0.00E+00 | LNK2    | ligand of numb-protein X 2 [Source:HGNC Symbol;Acc:HGNC:20421]                                           |
| 5326   | 0.6609 | -0.5975 | 0.00E+00 | PLAGL2  | pleiomorphic adenoma gene-like 2 [Source:HGNC Symbol;Acc:HGNC:9047]                                      |
| 23475  | 0.6553 | -0.6097 | 0.00E+00 | QPRT    | quinolinate phosphoribosyltransferase [Source:HGNC Symbol;Acc:HGNC:9755]                                 |

|               |        |         |          |                |                                                                                                                                  |
|---------------|--------|---------|----------|----------------|----------------------------------------------------------------------------------------------------------------------------------|
| 84706         | 0.6034 | -0.7289 | 0.00E+00 | GPT2           | glutamic pyruvate transaminase (alanine aminotransferase) 2 [Source:HGNC Symbol;Acc:HGNC:18062]                                  |
| 25924         | 0.5080 | -0.9772 | 0.00E+00 | MYRIP          | myosin VIIA and Rab interacting protein [Source:HGNC Symbol;Acc:HGNC:19156]                                                      |
| 10808         | 0.4398 | -1.1850 | 0.00E+00 | HSPH1          | heat shock 105kDa/110kDa protein 1 [Source:HGNC Symbol;Acc:HGNC:16969]                                                           |
| 130502        | 0.6201 | -0.6895 | 0.00E+00 | TTC32          | tetratricopeptide repeat domain 32 [Source:HGNC Symbol;Acc:HGNC:32954]                                                           |
| 1839          | 0.3857 | -1.3743 | 0.00E+00 | HBEGF          | heparin-binding EGF-like growth factor [Source:HGNC Symbol;Acc:HGNC:3059]                                                        |
| 78989         | 0.6108 | -0.7113 | 0.00E+00 | COLEC11        | collectin sub-family member 11 [Source:HGNC Symbol;Acc:HGNC:17213]                                                               |
| 493861        | 0.6197 | -0.6903 | 0.00E+00 | EID3           | EP300 interacting inhibitor of differentiation 3 [Source:HGNC Symbol;Acc:HGNC:32961]                                             |
| 4499          | 0.2787 | -1.8431 | 0.00E+00 | MT1M           | metallothionein 1M [Source:HGNC Symbol;Acc:HGNC:14296]                                                                           |
| 3957          | 0.5045 | -0.9870 | 0.00E+00 | LGALS2         | lectin, galactoside-binding, soluble, 2 [Source:HGNC Symbol;Acc:HGNC:6562]                                                       |
| 10365         | 0.5271 | -0.9239 | 0.00E+00 | KLF2           | Kruppel-like factor 2 [Source:HGNC Symbol;Acc:HGNC:6347]                                                                         |
| 100288<br>413 | 0.5917 | -0.7571 | 0.00E+00 | ERVMER34<br>-1 | endogenous retrovirus group MER34, member 1 [Source:HGNC Symbol;Acc:HGNC:42970]                                                  |
| 5997          | 0.6183 | -0.6935 | 0.00E+00 | RGS2           | regulator of G-protein signaling 2 [Source:HGNC Symbol;Acc:HGNC:9998]                                                            |
| 8870          | 0.4966 | -1.0098 | 0.00E+00 | IER3           | immediate early response 3 [Source:HGNC Symbol;Acc:HGNC:5392]                                                                    |
| 5265          | 0.3740 | -1.4191 | 0.00E+00 | SERPINA1       | serpin peptidase inhibitor, clade A (alpha-1 antitrypsin), member 1 [Source:HGNC Symbol;Acc:HGNC:8941]                           |
| 81932         | 0.6139 | -0.7040 | 0.00E+00 | HDHD3          | haloacid dehalogenase-like hydrolase domain containing 3 [Source:HGNC Symbol;Acc:HGNC:28171]                                     |
| 4072          | 0.5321 | -0.9103 | 0.00E+00 | EPCAM          | epithelial cell adhesion molecule [Source:HGNC Symbol;Acc:HGNC:11529]                                                            |
| 57584         | 0.6684 | -0.5812 | 0.00E+00 | ARHGAP21       | Rho GTPase activating protein 21 [Source:HGNC Symbol;Acc:HGNC:23725]                                                             |
| 5054          | 0.3703 | -1.4333 | 0.00E+00 | SERPINE1       | serpin peptidase inhibitor, clade E (nexin, plasminogen activator inhibitor type 1), member 1 [Source:HGNC Symbol;Acc:HGNC:8583] |
| 1579          | 0.5268 | -0.9246 | 0.00E+00 | CYP4A22        | cytochrome P450, family 4, subfamily A, polypeptide 22 [Source:HGNC Symbol;Acc:HGNC:20575]                                       |

|        |        |         |          |          |                                                                                                              |
|--------|--------|---------|----------|----------|--------------------------------------------------------------------------------------------------------------|
| 2706   | 0.5165 | -0.9531 | 0.00E+00 | GJB2     | gap junction protein, beta 2, 26kDa<br>[Source:HGNC<br>Symbol;Acc:HGNC:4284]                                 |
| 84251  | 0.6408 | -0.6421 | 0.00E+00 | SGIP1    | SH3-domain GRB2-like (endophilin)<br>interacting protein 1 [Source:HGNC<br>Symbol;Acc:HGNC:25412]            |
| 283375 | 0.6236 | -0.6814 | 0.00E+00 | SLC39A5  | solute carrier family 39 (zinc<br>transporter), member 5<br>[Source:HGNC<br>Symbol;Acc:HGNC:20502]           |
| 7678   | 0.5390 | -0.8917 | 0.00E+00 | ZNF124   | zinc finger protein 124<br>[Source:HGNC<br>Symbol;Acc:HGNC:12907]                                            |
| 64798  | 0.6349 | -0.6553 | 0.00E+00 | DEPTOR   | DEP domain containing MTOR-<br>interacting protein [Source:HGNC<br>Symbol;Acc:HGNC:22953]                    |
| 9929   | 0.6458 | -0.6308 | 0.00E+00 | JOSD1    | Josephin domain containing 1<br>[Source:HGNC<br>Symbol;Acc:HGNC:28953]                                       |
| 387882 | 0.5970 | -0.7441 | 0.00E+00 | C12ORF75 | chromosome 12 open reading frame<br>75 [Source:HGNC<br>Symbol;Acc:HGNC:35164]                                |
| 125206 | 0.5458 | -0.8736 | 0.00E+00 | SLC5A10  | solute carrier family 5<br>(sodium/sugar cotransporter),<br>member 10 [Source:HGNC<br>Symbol;Acc:HGNC:23155] |
| 57018  | 0.6530 | -0.6148 | 0.00E+00 | CCNL1    | cyclin L1 [Source:HGNC<br>Symbol;Acc:HGNC:20569]                                                             |
| 9075   | 0.4711 | -1.0860 | 0.00E+00 | CLDN2    | claudin 2 [Source:HGNC<br>Symbol;Acc:HGNC:2041]                                                              |
| 4495   | 0.4134 | -1.2743 | 0.00E+00 | MT1G     | metallothionein 1G [Source:HGNC<br>Symbol;Acc:HGNC:7399]                                                     |
| 9365   | 0.6523 | -0.6163 | 0.00E+00 | KL       | klotho [Source:HGNC<br>Symbol;Acc:HGNC:6344]                                                                 |
| 64284  | 0.6223 | -0.6844 | 0.00E+00 | RAB17    | RAB17, member RAS oncogene<br>family [Source:HGNC<br>Symbol;Acc:HGNC:16523]                                  |
| 18     | 0.6018 | -0.7326 | 0.00E+00 | ABAT     | 4-aminobutyrate aminotransferase<br>[Source:HGNC<br>Symbol;Acc:HGNC:23]                                      |
| 26     | 0.4376 | -1.1924 | 0.00E+00 | AOC1     | amine oxidase, copper containing 1<br>[Source:HGNC<br>Symbol;Acc:HGNC:80]                                    |
| 5770   | 0.6388 | -0.6465 | 0.00E+00 | PTPN1    | protein tyrosine phosphatase, non-<br>receptor type 1 [Source:HGNC<br>Symbol;Acc:HGNC:9642]                  |
| 28959  | 0.5401 | -0.8886 | 0.00E+00 | TMEM176B | transmembrane protein 176B<br>[Source:HGNC<br>Symbol;Acc:HGNC:29596]                                         |
| 8858   | 0.5902 | -0.7608 | 0.00E+00 | PROZ     | protein Z, vitamin K-dependent<br>plasma glycoprotein [Source:HGNC<br>Symbol;Acc:HGNC:9460]                  |
| 639    | 0.5863 | -0.7702 | 0.00E+00 | PRDM1    | PR domain containing 1, with ZNF<br>domain [Source:HGNC<br>Symbol;Acc:HGNC:9346]                             |
| 84457  | 0.6656 | -0.5872 | 0.00E+00 | PHYHIPL  | phytanoyl-CoA 2-hydroxylase<br>interacting protein-like<br>[Source:HGNC<br>Symbol;Acc:HGNC:29378]            |
| 2731   | 0.5939 | -0.7518 | 0.00E+00 | GLDC     | glycine dehydrogenase<br>(decarboxylating) [Source:HGNC<br>Symbol;Acc:HGNC:4313]                             |

|               |        |         |          |          |                                                                                                                        |
|---------------|--------|---------|----------|----------|------------------------------------------------------------------------------------------------------------------------|
| 6582          | 0.5673 | -0.8177 | 0.00E+00 | SLC22A2  | solute carrier family 22 (organic cation transporter), member 2 [Source:HGNC Symbol;Acc:HGNC:10966]                    |
| 151295        | 0.4023 | -1.3137 | 0.00E+00 | SLC23A3  | solute carrier family 23, member 3 [Source:HGNC Symbol;Acc:HGNC:20601]                                                 |
| 9056          | 0.5545 | -0.8506 | 0.00E+00 | SLC7A7   | solute carrier family 7 (amino acid transporter light chain, y+L system), member 7 [Source:HGNC Symbol;Acc:HGNC:11065] |
| 55603         | 0.6674 | -0.5834 | 0.00E+00 | FAM46A   | family with sequence similarity 46, member A [Source:HGNC Symbol;Acc:HGNC:18345]                                       |
| 9104          | 0.6430 | -0.6372 | 0.00E+00 | RGN      | regucalcin [Source:HGNC Symbol;Acc:HGNC:9989]                                                                          |
| 9353          | 0.6196 | -0.6907 | 0.00E+00 | SLIT2    | slit homolog 2 (Drosophila) [Source:HGNC Symbol;Acc:HGNC:11086]                                                        |
| 6242          | 0.6270 | -0.6735 | 0.00E+00 | RTKN     | rhotekin [Source:HGNC Symbol;Acc:HGNC:10466]                                                                           |
| 51181         | 0.6493 | -0.6232 | 0.00E+00 | DCXR     | dicarbonyl/L-xylulose reductase [Source:HGNC Symbol;Acc:HGNC:18985]                                                    |
| 83716         | 0.4318 | -1.2116 | 0.00E+00 | CRISPLD2 | cysteine-rich secretory protein LCCL domain containing 2 [Source:HGNC Symbol;Acc:HGNC:25248]                           |
| 387763        | 0.4699 | -1.0896 | 0.00E+00 | C11ORF96 | chromosome 11 open reading frame 96 [Source:HGNC Symbol;Acc:HGNC:38675]                                                |
| 1999          | 0.6219 | -0.6853 | 0.00E+00 | ELF3     | E74-like factor 3 (ets domain transcription factor, epithelial-specific ) [Source:HGNC Symbol;Acc:HGNC:3318]           |
| 55647         | 0.6582 | -0.6034 | 0.00E+00 | RAB20    | RAB20, member RAS oncogene family [Source:HGNC Symbol;Acc:HGNC:18260]                                                  |
| 6569          | 0.5532 | -0.8542 | 0.00E+00 | SLC34A1  | solute carrier family 34 (type II sodium/phosphate cotransporter), member 1 [Source:HGNC Symbol;Acc:HGNC:11019]        |
| 1969          | 0.6411 | -0.6415 | 0.00E+00 | EPHA2    | EPH receptor A2 [Source:HGNC Symbol;Acc:HGNC:3386]                                                                     |
| 3310          | 0.3316 | -1.5923 | 0.00E+00 | HSPA6    | heat shock 70kDa protein 6 (HSP70B') [Source:HGNC Symbol;Acc:HGNC:5239]                                                |
| 79746         | 0.6626 | -0.5938 | 0.00E+00 | ECHDC3   | enoyl CoA hydratase domain containing 3 [Source:HGNC Symbol;Acc:HGNC:23489]                                            |
| 124044        | 0.6073 | -0.7196 | 0.00E+00 | SPATA2L  | spermatogenesis associated 2-like [Source:HGNC Symbol;Acc:HGNC:28393]                                                  |
| 2329          | 0.6164 | -0.6980 | 0.00E+00 | FMO4     | flavin containing monooxygenase 4 [Source:HGNC Symbol;Acc:HGNC:3772]                                                   |
| 100507<br>650 | 0.4217 | -1.2458 | 0.00E+00 | RNF212B  | ring finger protein 212B [Source:HGNC Symbol;Acc:HGNC:20438]                                                           |
| 3305          | 0.6288 | -0.6694 | 0.00E+00 | HSPA1L   | heat shock 70kDa protein 1-like [Source:HGNC Symbol;Acc:HGNC:5234]                                                     |



|        |        |         |          |          |                                                                                                                 |
|--------|--------|---------|----------|----------|-----------------------------------------------------------------------------------------------------------------|
| 84275  | 0.6536 | -0.6134 | 0.00E+00 | SLC25A33 | solute carrier family 25 (pyrimidine nucleotide carrier), member 33<br>[Source:HGNC<br>Symbol;Acc:HGNC:29681]   |
| 9456   | 0.4723 | -1.0822 | 0.00E+00 | HOMER1   | homer scaffolding protein 1<br>[Source:HGNC<br>Symbol;Acc:HGNC:17512]                                           |
| 1962   | 0.6554 | -0.6095 | 0.00E+00 | EHHADH   | enoyl-CoA, hydratase/3-hydroxyacyl CoA dehydrogenase<br>[Source:HGNC<br>Symbol;Acc:HGNC:3247]                   |
| 8644   | 0.5501 | -0.8624 | 0.00E+00 | AKR1C3   | aldo-keto reductase family 1, member C3<br>[Source:HGNC<br>Symbol;Acc:HGNC:386]                                 |
| 1184   | 0.6628 | -0.5935 | 0.00E+00 | CLCN5    | chloride channel, voltage-sensitive 5<br>[Source:HGNC<br>Symbol;Acc:HGNC:2023]                                  |
| 2348   | 0.6306 | -0.6651 | 0.00E+00 | FOLR1    | folate receptor 1 (adult)<br>[Source:HGNC<br>Symbol;Acc:HGNC:3791]                                              |
| 6590   | 0.5543 | -0.8513 | 0.00E+00 | SLPI     | secretory leukocyte peptidase inhibitor<br>[Source:HGNC<br>Symbol;Acc:HGNC:11092]                               |
| 8836   | 0.5886 | -0.7647 | 0.00E+00 | GGH      | gamma-glutamyl hydrolase (conjugase, foyl)polygammaglutamyl hydrolase)<br>[Source:HGNC<br>Symbol;Acc:HGNC:4248] |
| 10615  | 0.6573 | -0.6053 | 0.00E+00 | SPAG5    | sperm associated antigen 5<br>[Source:HGNC<br>Symbol;Acc:HGNC:13452]                                            |
| 80339  | 0.6365 | -0.6517 | 0.00E+00 | PNPLA3   | patatin-like phospholipase domain containing 3<br>[Source:HGNC<br>Symbol;Acc:HGNC:18590]                        |
| 91947  | 0.6681 | -0.5818 | 0.00E+00 | ARRDC4   | arrestin domain containing 4<br>[Source:HGNC<br>Symbol;Acc:HGNC:28087]                                          |
| 83481  | 0.6229 | -0.6829 | 0.00E+00 | EPPK1    | epiplakin 1<br>[Source:HGNC<br>Symbol;Acc:HGNC:15577]                                                           |
| 4860   | 0.6534 | -0.6140 | 0.00E+00 | PNP      | purine nucleoside phosphorylase<br>[Source:HGNC<br>Symbol;Acc:HGNC:7892]                                        |
| 6515   | 0.4773 | -1.0669 | 0.00E+00 | SLC2A3   | solute carrier family 2 (facilitated glucose transporter), member 3<br>[Source:HGNC<br>Symbol;Acc:HGNC:11007]   |
| 55365  | 0.5720 | -0.8058 | 0.00E+00 | TMEM176A | transmembrane protein 176A<br>[Source:HGNC<br>Symbol;Acc:HGNC:24930]                                            |
| 4482   | 0.6447 | -0.6332 | 0.00E+00 | MSRA     | methionine sulfoxide reductase A<br>[Source:HGNC<br>Symbol;Acc:HGNC:7377]                                       |
| 130589 | 0.6380 | -0.6483 | 0.00E+00 | GALM     | galactose mutarotase (aldose 1-epimerase)<br>[Source:HGNC<br>Symbol;Acc:HGNC:24063]                             |
| 1014   | 0.6683 | -0.5814 | 0.00E+00 | CDH16    | cadherin 16, KSP-cadherin<br>[Source:HGNC<br>Symbol;Acc:HGNC:1755]                                              |
| 84451  | 0.6159 | -0.6993 | 0.00E+00 | MLK4     | Mitogen-activated protein kinase kinase kinase MLK4<br>[Source:UniProtKB/Swiss-Prot;Acc:Q5TCX8]                 |

|        |        |         |          |          |                                                                                                                 |
|--------|--------|---------|----------|----------|-----------------------------------------------------------------------------------------------------------------|
| 7748   | 0.6512 | -0.6188 | 0.00E+00 | ZNF195   | zinc finger protein 195<br>[Source:HGNC<br>Symbol;Acc:HGNC:12986]                                               |
| 121506 | 0.4706 | -1.0874 | 0.00E+00 | ERP27    | endoplasmic reticulum protein 27<br>[Source:HGNC<br>Symbol;Acc:HGNC:26495]                                      |
| 2289   | 0.4933 | -1.0193 | 0.00E+00 | FKBP5    | FK506 binding protein 5<br>[Source:HGNC<br>Symbol;Acc:HGNC:3721]                                                |
| 9131   | 0.6534 | -0.6139 | 0.00E+00 | AIFM1    | apoptosis-inducing factor,<br>mitochondrion-associated, 1<br>[Source:HGNC<br>Symbol;Acc:HGNC:8768]              |
| 51267  | 0.5326 | -0.9088 | 0.00E+00 | CLEC1A   | C-type lectin domain family 1,<br>member A [Source:HGNC<br>Symbol;Acc:HGNC:24355]                               |
| 3249   | 0.6004 | -0.7361 | 0.00E+00 | HPN      | hepsin [Source:HGNC<br>Symbol;Acc:HGNC:5155]                                                                    |
| 866    | 0.5504 | -0.8614 | 0.00E+00 | SERPINA6 | serpin peptidase inhibitor, clade A<br>(alpha-1 antitrypsin), member 6<br>[Source:HGNC<br>Symbol;Acc:HGNC:1540] |
| 134288 | 0.5448 | -0.8763 | 0.00E+00 | TMEM174  | transmembrane protein 174<br>[Source:HGNC<br>Symbol;Acc:HGNC:28187]                                             |
| 80221  | 0.6438 | -0.6354 | 0.00E+00 | ACSF2    | acyl-CoA synthetase family member<br>2 [Source:HGNC<br>Symbol;Acc:HGNC:26101]                                   |
| 2215   | 0.4888 | -1.0328 | 0.00E+00 | FCGR3B   | Fc fragment of IgG, low affinity IIIb,<br>receptor (CD16b) [Source:HGNC<br>Symbol;Acc:HGNC:3620]                |
| 27294  | 0.6521 | -0.6168 | 0.00E+00 | DHDH     | dihydrodiol dehydrogenase<br>(dimeric) [Source:HGNC<br>Symbol;Acc:HGNC:17887]                                   |
| 84560  | 0.6615 | -0.5961 | 0.00E+00 | MT4      | metallothionein 4 [Source:HGNC<br>Symbol;Acc:HGNC:18705]                                                        |
| 6279   | 0.4539 | -1.1395 | 0.00E+00 | S100A8   | S100 calcium binding protein A8<br>[Source:HGNC<br>Symbol;Acc:HGNC:10498]                                       |
| 9071   | 0.5645 | -0.8251 | 0.00E+00 | CLDN10   | claudin 10 [Source:HGNC<br>Symbol;Acc:HGNC:2033]                                                                |
| 10245  | 0.6633 | -0.5923 | 0.00E+00 | TIMM17B  | translocase of inner mitochondrial<br>membrane 17 homolog B (yeast)<br>[Source:HGNC<br>Symbol;Acc:HGNC:17310]   |
| 83959  | 0.5834 | -0.7776 | 0.00E+00 | SLC4A11  | solute carrier family 4, sodium<br>borate transporter, member 11<br>[Source:HGNC<br>Symbol;Acc:HGNC:16438]      |
| 5243   | 0.5822 | -0.7805 | 0.00E+00 | ABCB1    | ATP-binding cassette, sub-family B<br>(MDR/TAP), member 1<br>[Source:HGNC<br>Symbol;Acc:HGNC:40]                |
| 115749 | 0.6642 | -0.5903 | 0.00E+00 | C12ORF56 | chromosome 12 open reading frame<br>56 [Source:HGNC<br>Symbol;Acc:HGNC:26967]                                   |
| 112817 | 0.6477 | -0.6266 | 0.00E+00 | HOGA1    | 4-hydroxy-2-oxoglutarate aldolase 1<br>[Source:HGNC<br>Symbol;Acc:HGNC:25155]                                   |
| 55753  | 0.6478 | -0.6264 | 0.00E+00 | OGDHL    | oxoglutarate dehydrogenase-like<br>[Source:HGNC<br>Symbol;Acc:HGNC:25590]                                       |

|        |        |         |          |                 |                                                                                                                               |
|--------|--------|---------|----------|-----------------|-------------------------------------------------------------------------------------------------------------------------------|
| 8793   | 0.6654 | -0.5876 | 0.00E+00 | TNFRSF10<br>D   | tumor necrosis factor receptor superfamily, member 10d, decoy with truncated death domain [Source:HGNC Symbol;Acc:HGNC:11907] |
| 1164   | 0.5851 | -0.7732 | 0.00E+00 | CKS2            | CDC28 protein kinase regulatory subunit 2 [Source:HGNC Symbol;Acc:HGNC:2000]                                                  |
| 330    | 0.5211 | -0.9403 | 0.00E+00 | BIRC3           | baculoviral IAP repeat containing 3 [Source:HGNC Symbol;Acc:HGNC:591]                                                         |
| 2018   | 0.6163 | -0.6983 | 0.00E+00 | EMX2            | empty spiracles homeobox 2 [Source:HGNC Symbol;Acc:HGNC:3341]                                                                 |
| 10841  | 0.6383 | -0.6478 | 0.00E+00 | FTCD            | formimidoyltransferase cyclodeaminase [Source:HGNC Symbol;Acc:HGNC:3974]                                                      |
| 316    | 0.5561 | -0.8465 | 0.00E+00 | AOX1            | aldehyde oxidase 1 [Source:HGNC Symbol;Acc:HGNC:553]                                                                          |
| 23670  | 0.6388 | -0.6465 | 0.00E+00 | TMEM2           | transmembrane protein 2 [Source:HGNC Symbol;Acc:HGNC:11869]                                                                   |
| 6273   | 0.3675 | -1.4443 | 0.00E+00 | S100A2          | S100 calcium binding protein A2 [Source:HGNC Symbol;Acc:HGNC:10492]                                                           |
| 5950   | 0.5178 | -0.9495 | 0.00E+00 | RBP4            | retinol binding protein 4, plasma [Source:HGNC Symbol;Acc:HGNC:9922]                                                          |
| 222643 | 0.5398 | -0.8895 | 0.00E+00 | UNC5CL          | unc-5 homolog C (C. elegans)-like [Source:HGNC Symbol;Acc:HGNC:21203]                                                         |
| 359    | 0.6048 | -0.7254 | 0.00E+00 | AQP2            | aquaporin 2 (collecting duct) [Source:HGNC Symbol;Acc:HGNC:634]                                                               |
| 9547   | 0.5479 | -0.8681 | 0.00E+00 | CXCL14          | chemokine (C-X-C motif) ligand 14 [Source:HGNC Symbol;Acc:HGNC:10640]                                                         |
| 7074   | 0.6577 | -0.6045 | 0.00E+00 | TIAM1           | T-cell lymphoma invasion and metastasis 1 [Source:HGNC Symbol;Acc:HGNC:11805]                                                 |
| 54886  | 0.5547 | -0.8501 | 0.00E+00 | RP11-<br>35N6.1 | Lipid phosphate phosphatase-related protein type 1 [Source:UniProtKB/Swiss-Prot;Acc:Q8TB]4]                                   |
| 117854 | 0.6076 | -0.7189 | 0.00E+00 | TRIM6           | tripartite motif containing 6 [Source:HGNC Symbol;Acc:HGNC:16277]                                                             |
| 81563  | 0.6684 | -0.5813 | 0.00E+00 | C10RF21         | chromosome 1 open reading frame 21 [Source:HGNC Symbol;Acc:HGNC:15494]                                                        |
| 347    | 0.4042 | -1.3069 | 0.00E+00 | APOD            | apolipoprotein D [Source:HGNC Symbol;Acc:HGNC:612]                                                                            |
| 55195  | 0.6467 | -0.6288 | 0.00E+00 | C14ORF10<br>5   | chromosome 14 open reading frame 105 [Source:HGNC Symbol;Acc:HGNC:20189]                                                      |
| 80896  | 0.6256 | -0.6766 | 0.00E+00 | NPL             | N-acetylneuraminatase pyruvate lyase (dihydrodipicolinate synthase) [Source:HGNC Symbol;Acc:HGNC:16781]                       |
| 23136  | 0.6501 | -0.6213 | 1.52E-04 | EPB41L3         | erythrocyte membrane protein band 4.1-like 3 [Source:HGNC Symbol;Acc:HGNC:3380]                                               |

|               |        |         |          |         |                                                                                                           |
|---------------|--------|---------|----------|---------|-----------------------------------------------------------------------------------------------------------|
| 25878         | 2.0623 | 1.0443  | 1.57E-04 | MXRA5   | matrix-remodelling associated 5<br>[Source:HGNC<br>Symbol;Acc:HGNC:7539]                                  |
| 11130         | 1.5527 | 0.6348  | 1.57E-04 | ZWINT   | ZW10 interacting kinetochore<br>protein [Source:HGNC<br>Symbol;Acc:HGNC:13195]                            |
| 2170          | 0.5962 | -0.7461 | 1.61E-04 | FABP3   | fatty acid binding protein 3, muscle<br>and heart [Source:HGNC<br>Symbol;Acc:HGNC:3557]                   |
| 29119         | 0.6433 | -0.6364 | 2.77E-04 | CTNNA3  | catenin (cadherin-associated<br>protein), alpha 3 [Source:HGNC<br>Symbol;Acc:HGNC:2511]                   |
| 11013         | 2.0052 | 1.0037  | 2.80E-04 | TMSB15A | thymosin beta 15a [Source:HGNC<br>Symbol;Acc:HGNC:30744]                                                  |
| 100170<br>765 | 0.6168 | -0.6971 | 2.83E-04 | ERICH4  | glutamate-rich 4 [Source:HGNC<br>Symbol;Acc:HGNC:34497]                                                   |
| 163782        | 1.5197 | 0.6038  | 2.87E-04 | KANK4   | KN motif and ankyrin repeat<br>domains 4 [Source:HGNC<br>Symbol;Acc:HGNC:27263]                           |
| 6574          | 0.5955 | -0.7478 | 2.87E-04 | SLC20A1 | solute carrier family 20 (phosphate<br>transporter), member 1<br>[Source:HGNC<br>Symbol;Acc:HGNC:10946]   |
| 81788         | 0.6668 | -0.5847 | 2.94E-04 | NUAK2   | NUAK family, SNF1-like kinase, 2<br>[Source:HGNC<br>Symbol;Acc:HGNC:29558]                                |
| 164832        | 0.5990 | -0.7394 | 2.94E-04 | LONRF2  | LON peptidase N-terminal domain<br>and ring finger 2 [Source:HGNC<br>Symbol;Acc:HGNC:24788]               |
| 2888          | 0.5879 | -0.7664 | 3.98E-04 | GRB14   | growth factor receptor-bound<br>protein 14 [Source:HGNC<br>Symbol;Acc:HGNC:4565]                          |
| 3684          | 1.6066 | 0.6840  | 4.03E-04 | ITGAM   | integrin, alpha M (complement<br>component 3 receptor 3 subunit)<br>[Source:HGNC<br>Symbol;Acc:HGNC:6149] |
| 50486         | 0.6591 | -0.6014 | 4.03E-04 | G0S2    | G0/G1 switch 2 [Source:HGNC<br>Symbol;Acc:HGNC:30229]                                                     |
| 91752         | 0.6467 | -0.6288 | 4.03E-04 | ZNF804A | zinc finger protein 804A<br>[Source:HGNC<br>Symbol;Acc:HGNC:21711]                                        |
| 8547          | 1.5572 | 0.6389  | 4.57E-04 | FCN3    | ficolin (collagen/fibrinogen domain<br>containing) 3 [Source:HGNC<br>Symbol;Acc:HGNC:3625]                |
| 290           | 0.6349 | -0.6554 | 5.03E-04 | ANPEP   | alanyl (membrane) aminopeptidase<br>[Source:HGNC<br>Symbol;Acc:HGNC:500]                                  |
| 4023          | 0.5767 | -0.7942 | 5.10E-04 | LPL     | lipoprotein lipase [Source:HGNC<br>Symbol;Acc:HGNC:6677]                                                  |
| 54988         | 0.6453 | -0.6320 | 5.10E-04 | ACSM5   | acyl-CoA synthetase medium-chain<br>family member 5 [Source:HGNC<br>Symbol;Acc:HGNC:26060]                |
| 2357          | 0.6219 | -0.6853 | 6.20E-04 | FPR1    | formyl peptide receptor 1<br>[Source:HGNC<br>Symbol;Acc:HGNC:3826]                                        |
| 6402          | 0.5642 | -0.8257 | 6.20E-04 | SELL    | selectin L [Source:HGNC<br>Symbol;Acc:HGNC:10720]                                                         |
| 3291          | 0.6600 | -0.5996 | 8.12E-04 | HSD11B2 | hydroxysteroid (11-beta)<br>dehydrogenase 2 [Source:HGNC<br>Symbol;Acc:HGNC:5209]                         |
| 718           | 1.6945 | 0.7608  | 8.26E-04 | C3      | complement component 3<br>[Source:HGNC<br>Symbol;Acc:HGNC:1318]                                           |

|        |        |         |          |               |                                                                                                                 |
|--------|--------|---------|----------|---------------|-----------------------------------------------------------------------------------------------------------------|
| 80271  | 0.5948 | -0.7494 | 8.26E-04 | ITPKC         | inositol-trisphosphate 3-kinase C<br>[Source:HGNC<br>Symbol;Acc:HGNC:14897]                                     |
| 57007  | 0.6049 | -0.7251 | 9.18E-04 | ACKR3         | atypical chemokine receptor 3<br>[Source:HGNC<br>Symbol;Acc:HGNC:23692]                                         |
| 5649   | 0.5736 | -0.8020 | 1.02E-03 | RELN          | reelin [Source:HGNC<br>Symbol;Acc:HGNC:9957]                                                                    |
| 415    | 0.5931 | -0.7536 | 1.02E-03 | ARSE          | arylsulfatase E (chondrodysplasia<br>punctata 1) [Source:HGNC<br>Symbol;Acc:HGNC:719]                           |
| 9358   | 1.5386 | 0.6216  | 1.12E-03 | ITGBL1        | integrin, beta-like 1 (with EGF-like<br>repeat domains) [Source:HGNC<br>Symbol;Acc:HGNC:6164]                   |
| 84417  | 1.6012 | 0.6792  | 1.12E-03 | C2ORF40       | chromosome 2 open reading frame<br>40 [Source:HGNC<br>Symbol;Acc:HGNC:24642]                                    |
| 122416 | 1.5859 | 0.6653  | 1.22E-03 | ANKRD9        | ankyrin repeat domain 9<br>[Source:HGNC<br>Symbol;Acc:HGNC:20096]                                               |
| 25928  | 1.5967 | 0.6751  | 1.22E-03 | SOSTDC1       | sclerostin domain containing 1<br>[Source:HGNC<br>Symbol;Acc:HGNC:21748]                                        |
| 1950   | 0.6131 | -0.7057 | 1.26E-03 | EGF           | epidermal growth factor<br>[Source:HGNC<br>Symbol;Acc:HGNC:3229]                                                |
| 1672   | 0.5737 | -0.8017 | 1.26E-03 | DEFB1         | defensin, beta 1 [Source:HGNC<br>Symbol;Acc:HGNC:2766]                                                          |
| 6280   | 0.6519 | -0.6173 | 1.26E-03 | S100A9        | S100 calcium binding protein A9<br>[Source:HGNC<br>Symbol;Acc:HGNC:10499]                                       |
| 730    | 1.6223 | 0.6980  | 1.59E-03 | C7            | complement component 7<br>[Source:HGNC<br>Symbol;Acc:HGNC:1346]                                                 |
| 57211  | 0.6349 | -0.6554 | 1.71E-03 | ADGRG6        | adhesion G protein-coupled<br>receptor G6 [Source:HGNC<br>Symbol;Acc:HGNC:13841]                                |
| 4745   | 1.6089 | 0.6861  | 1.94E-03 | NELL1         | NEL-like 1 (chicken) [Source:HGNC<br>Symbol;Acc:HGNC:7750]                                                      |
| 283120 | 1.5322 | 0.6156  | 2.12E-03 | H19           | H19, imprinted maternally<br>expressed transcript (non-protein<br>coding) [Source:HGNC<br>Symbol;Acc:HGNC:4713] |
| 7704   | 0.4457 | -1.1657 | 2.59E-03 | ZBTB16        | zinc finger and BTB domain<br>containing 16 [Source:HGNC<br>Symbol;Acc:HGNC:12930]                              |
| 4283   | 1.6440 | 0.7172  | 3.35E-03 | CXCL9         | chemokine (C-X-C motif) ligand 9<br>[Source:HGNC<br>Symbol;Acc:HGNC:7098]                                       |
| 825    | 0.6223 | -0.6844 | 3.35E-03 | CAPN3         | calpain 3, (p94) [Source:HGNC<br>Symbol;Acc:HGNC:1480]                                                          |
| 1959   | 0.4784 | -1.0636 | 4.12E-03 | EGR2          | early growth response 2<br>[Source:HGNC<br>Symbol;Acc:HGNC:3239]                                                |
| 4316   | 1.5317 | 0.6152  | 5.12E-03 | MMP7          | matrix metalloproteinase 7<br>[Source:HGNC<br>Symbol;Acc:HGNC:7174]                                             |
| 6785   | 0.6415 | -0.6404 | 5.12E-03 | ELOVL4        | ELOVL fatty acid elongase 4<br>[Source:HGNC<br>Symbol;Acc:HGNC:14415]                                           |
| 51330  | 0.6611 | -0.5971 | 8.00E-03 | TNFRSF12<br>A | tumor necrosis factor receptor<br>superfamily, member 12A<br>[Source:HGNC<br>Symbol;Acc:HGNC:18152]             |

|      |        |         |          |       |                                                                                      |
|------|--------|---------|----------|-------|--------------------------------------------------------------------------------------|
| 1008 | 0.6631 | -0.5928 | 9.08E-03 | CDH10 | cadherin 10, type 2 (T2-cadherin)<br>[Source:HGNC<br>Symbol;Acc:HGNC:1749]           |
| 8838 | 0.6454 | -0.6317 | 9.72E-03 | WISP3 | WNT1 inducible signaling pathway<br>protein 3 [Source:HGNC<br>Symbol;Acc:HGNC:12771] |
| 1803 | 0.5642 | -0.8258 | 9.72E-03 | DPP4  | dipeptidyl-peptidase 4<br>[Source:HGNC<br>Symbol;Acc:HGNC:3009]                      |

**Supplemental Table 2:** List of positive standard genes from different cell types. Genes with underline are standard genes found in the current dataset. Bold genes with underline are significantly regulated standard genes found in the current dataset.

| Cell type      | Standard genes                                                                                                                                                                                                                                                                                                                                                                                                                                                                                                                                                                         |
|----------------|----------------------------------------------------------------------------------------------------------------------------------------------------------------------------------------------------------------------------------------------------------------------------------------------------------------------------------------------------------------------------------------------------------------------------------------------------------------------------------------------------------------------------------------------------------------------------------------|
| Mesangial cell | <u>ACTA2</u> , <u>AGTR1</u> , <u>AKR1C3</u> , ANGPT2, <u>BMP4</u> , <u>CAD</u> , <u>CALD1</u> , <u>CD34</u> , <u>ETS1</u> , <u>F2R</u> , <u>F5</u> , <u>FBN1</u> , <u>GAS6</u> , <u>IGFBP5</u> , <u>ITGA8</u> , <u>ITGAV</u> , ITGB1, <u>KLF6</u> , <u>NES</u> , <u>Nox4</u> , <u>SERPINE1</u> , <u>PCDH12</u> , PDGFRA, PDGFRB, PTGS1/COX1, SERPINB7, <u>SERPINE2</u> , SOX9, <u>TAGLN</u> , TG2, <u>THY1</u> , <u>TNS1</u> , <u>TNS3</u> , <u>TXNIP</u> , <u>USP2</u>                                                                                                                |
| Podocyte       | <u>ACTN4</u> , NPHS1, NPHS2, SYNPO, PTPRO, <u>NES</u> , DDN, LRRC7, <u>WT1</u> , <u>TCF21</u> , MAGI1, <u>MAGI2</u> , RAB3A, <u>KIRREL</u> , <u>KIRREL2</u> , KIRREL3, CD2AP, <u>CASK</u> , IQGAP1, <u>TIP1</u> , <u>TRPC6</u> , <u>NCK2</u> , DES, <u>PDPN</u> , <u>PODXL</u> , <u>LMX1B</u> , <u>FAT1</u> , CDH3, <u>PLCE1</u> , <u>CLIC5</u> , CDH13, <u>MME</u> , <u>UCLH1</u> , CD80, Sv2b, <u>PALLD</u> , <u>FYN</u> , <u>PLAUR</u> , <u>DAG1</u> , AGRN, <u>EFNB1</u> , <u>EZR</u> , FOXC2, <u>MAFB</u> , <u>UTRN</u> , MYOC, <u>BASP1</u> , <u>SULF1</u> , SCEL, <u>CX3CL1</u> |

**Supplemental Table 3:** List of all significantly regulated proteins identified in mass spectrometry data analysis. Proteins are sorted according to BH p-values (Benjamin-Hochberg adjustment) and fold change is considered up regulation if p-value >1.15 and down regulation if p-value <0.85.

| Accession | Fold change (unlogged) | Fold change (log2) | BH p-value | Symbol | Description                                                                                                        |
|-----------|------------------------|--------------------|------------|--------|--------------------------------------------------------------------------------------------------------------------|
| O60613    | 2.9924                 | 1.5813             | 3.86E-08   | SEP15  | 15 kDa selenoprotein OS=Homo sapiens GN=SEP15 PE=1 SV=3 - [SEP15_HUMAN]                                            |
| Q9BQE4    | 3.2495                 | 1.7002             | 6.81E-08   | SELS   | Selenoprotein S OS=Homo sapiens GN=VIMP PE=1 SV=3 - [SELS_HUMAN]                                                   |
| Q8WWX9    | 3.5669                 | 1.8347             | 7.18E-08   | SELM   | Selenoprotein M OS=Homo sapiens GN=SELM PE=1 SV=3 - [SELM_HUMAN]                                                   |
| Q01581    | 0.4902                 | -1.0286            | 2.62E-07   | HMCS1  | Hydroxymethylglutaryl-CoA synthase, cytoplasmic OS=Homo sapiens GN=HMGCS1 PE=1 SV=2 - [HMCS1_HUMAN]                |
| P35222    | 1.2434                 | 0.3142             | 2.62E-07   | CTNB1  | Catenin beta-1 OS=Homo sapiens GN=CTNNB1 PE=1 SV=1 - [CTNB1_HUMAN]                                                 |
| P05121    | 0.4930                 | -1.0203            | 3.22E-07   | PAI1   | Plasminogen activator inhibitor 1 OS=Homo sapiens GN=SERPINE1 PE=1 SV=1 - [PAI1_HUMAN]                             |
| Q9Y6K8    | 0.7200                 | -0.4739            | 3.22E-07   | KAD5   | Adenylate kinase isoenzyme 5 OS=Homo sapiens GN=AK5 PE=1 SV=2 - [KAD5_HUMAN]                                       |
| Q9HBL0    | 1.1681                 | 0.2242             | 3.35E-07   | TENS1  | Tensin-1 OS=Homo sapiens GN=TNS1 PE=1 SV=2 - [TENS1_HUMAN]                                                         |
| Q96M96    | 0.7510                 | -0.4130            | 3.42E-07   | FGD4   | FYVE, RhoGEF and PH domain-containing protein 4 OS=Homo sapiens GN=FGD4 PE=1 SV=2 - [FGD4_HUMAN]                   |
| P07203    | 3.3710                 | 1.7532             | 4.95E-07   | GPX1   | Glutathione peroxidase 1 OS=Homo sapiens GN=GPX1 PE=1 SV=4 - [GPX1_HUMAN]                                          |
| Q16850    | 0.5173                 | -0.9509            | 4.95E-07   | CP51A  | Lanosterol 14-alpha demethylase OS=Homo sapiens GN=CYP51A1 PE=1 SV=3 - [CP51A_HUMAN]                               |
| Q96BY6    | 1.2392                 | 0.3094             | 4.95E-07   | DOC10  | Dedicator of cytokinesis protein 10 OS=Homo sapiens GN=DOCK10 PE=1 SV=3 - [DOC10_HUMAN]                            |
| Q92626    | 1.9732                 | 0.9806             | 5.92E-07   | PXDN   | Peroxidasin homolog OS=Homo sapiens GN=PXDN PE=1 SV=2 - [PXDN_HUMAN]                                               |
| Q15582    | 7.7023                 | 2.9453             | 6.65E-07   | BGH3   | Transforming growth factor-beta-induced protein ig-h3 OS=Homo sapiens GN=TGFBI PE=1 SV=1 - [BGH3_HUMAN]            |
| Q7Z7A1    | 35.7000                | 5.1579             | 6.65E-07   | CNTRL  | Centriolin OS=Homo sapiens GN=CNTRL PE=1 SV=2 - [CNTRL_HUMAN]                                                      |
| P49748    | 1.3184                 | 0.3988             | 6.65E-07   | ACADV  | Very long-chain specific acyl-CoA dehydrogenase, mitochondrial OS=Homo sapiens GN=ACADVL PE=1 SV=1 - [ACADV_HUMAN] |

|        |         |         |          |       |                                                                                                              |
|--------|---------|---------|----------|-------|--------------------------------------------------------------------------------------------------------------|
| Q9H845 | 1.1832  | 0.2427  | 7.28E-07 | ACAD9 | Acyl-CoA dehydrogenase family member 9, mitochondrial OS=Homo sapiens GN=ACAD9 PE=1 SV=1 - [ACAD9_HUMAN]     |
| P23634 | 1.2109  | 0.2761  | 7.28E-07 | AT2B4 | Plasma membrane calcium-transporting ATPase 4 OS=Homo sapiens GN=ATP2B4 PE=1 SV=2 - [AT2B4_HUMAN]            |
| P06756 | 1.4495  | 0.5356  | 7.28E-07 | ITAV  | Integrin alpha-V OS=Homo sapiens GN=ITGAV PE=1 SV=2 - [ITAV_HUMAN]                                           |
| P48735 | 1.2617  | 0.3354  | 7.59E-07 | IDHP  | Isocitrate dehydrogenase [NADP], mitochondrial OS=Homo sapiens GN=IDH2 PE=1 SV=2 - [IDHP_HUMAN]              |
| P52292 | 0.6128  | -0.7065 | 7.59E-07 | IMA1  | Importin subunit alpha-1 OS=Homo sapiens GN=KPNA2 PE=1 SV=1 - [IMA1_HUMAN]                                   |
| P08243 | 0.7390  | -0.4363 | 7.59E-07 | ASNS  | Asparagine synthetase [glutamine-hydrolyzing] OS=Homo sapiens GN=ASNS PE=1 SV=4 - [ASNS_HUMAN]               |
| P04004 | 4.2041  | 2.0718  | 7.59E-07 | VTNC  | Vitronectin OS=Homo sapiens GN=VTN PE=1 SV=1 - [VTNC_HUMAN]                                                  |
| P42892 | 0.6320  | -0.6619 | 7.59E-07 | ECE1  | Endothelin-converting enzyme 1 OS=Homo sapiens GN=ECE1 PE=1 SV=2 - [ECE1_HUMAN]                              |
| Q9UKX5 | 1.3103  | 0.3899  | 8.36E-07 | ITA11 | Integrin alpha-11 OS=Homo sapiens GN=ITGA11 PE=1 SV=2 - [ITA11_HUMAN]                                        |
| Q10472 | 1.2719  | 0.3470  | 8.36E-07 | GALT1 | Polypeptide N-acetylgalactosaminyltransferase 1 OS=Homo sapiens GN=GALNT1 PE=1 SV=1 - [GALT1_HUMAN]          |
| P13804 | 1.1532  | 0.2057  | 8.36E-07 | ETFA  | Electron transfer flavoprotein subunit alpha, mitochondrial OS=Homo sapiens GN=ETFA PE=1 SV=1 - [ETFA_HUMAN] |
| O95379 | 1.5370  | 0.6201  | 9.30E-07 | TFIP8 | Tumor necrosis factor alpha-induced protein 8 OS=Homo sapiens GN=TNFAIP8 PE=1 SV=1 - [TFIP8_HUMAN]           |
| Q9NSV4 | 0.5950  | -0.7489 | 1.13E-06 | DIAP3 | Protein diaphanous homolog 3 OS=Homo sapiens GN=DIAPH3 PE=1 SV=4 - [DIAP3_HUMAN]                             |
| Q9HCU0 | 1.4961  | 0.5812  | 1.24E-06 | CD248 | Endosialin OS=Homo sapiens GN=CD248 PE=1 SV=1 - [CD248_HUMAN]                                                |
| P37268 | 0.6853  | -0.5451 | 1.39E-06 | FDFT  | Squalene synthase OS=Homo sapiens GN=FDFT1 PE=1 SV=1 - [FDFT_HUMAN]                                          |
| Q53EL6 | 1.4191  | 0.5050  | 1.39E-06 | PDCD4 | Programmed cell death protein 4 OS=Homo sapiens GN=PDCD4 PE=1 SV=2 - [PDCD4_HUMAN]                           |
| P05090 | 31.2738 | 4.9669  | 1.39E-06 | APOD  | Apolipoprotein D OS=Homo sapiens GN=APOD PE=1 SV=1 - [APOD_HUMAN]                                            |
| P43121 | 1.3164  | 0.3966  | 1.39E-06 | MUC18 | Cell surface glycoprotein MUC18 OS=Homo sapiens GN=MCAM PE=1 SV=2 - [MUC18_HUMAN]                            |
| Q6XZF7 | 0.8141  | -0.2968 | 1.54E-06 | DNMBP | Dynamin-binding protein OS=Homo sapiens GN=DNMBP PE=1 SV=1 - [DNMBP_HUMAN]                                   |



|        |         |         |          |       |                                                                                                                      |
|--------|---------|---------|----------|-------|----------------------------------------------------------------------------------------------------------------------|
| Q13740 | 1.2400  | 0.3104  | 1.54E-06 | CD166 | CD166 antigen OS=Homo sapiens<br>GN=ALCAM PE=1 SV=2 -<br>[CD166_HUMAN]                                               |
| Q16881 | 2.0173  | 1.0124  | 1.60E-06 | TRXR1 | Thioredoxin reductase 1,<br>cytoplasmic OS=Homo sapiens<br>GN=TXNRD1 PE=1 SV=3 -<br>[TRXR1_HUMAN]                    |
| Q99715 | 1.1750  | 0.2327  | 1.69E-06 | COCA1 | Collagen alpha-1(XII) chain<br>OS=Homo sapiens GN=COL12A1<br>PE=1 SV=2 - [COCA1_HUMAN]                               |
| P24821 | 2.1394  | 1.0972  | 1.69E-06 | TENA  | Tenascin OS=Homo sapiens<br>GN=TNC PE=1 SV=3 -<br>[TENA_HUMAN]                                                       |
| Q53GA4 | 0.4652  | -1.1041 | 1.69E-06 | PHLA2 | Pleckstrin homology-like domain<br>family A member 2 OS=Homo<br>sapiens GN=PHLDA2 PE=1 SV=2 -<br>[PHLA2_HUMAN]       |
| Q9H425 | 1.2644  | 0.3384  | 1.69E-06 | CA198 | Uncharacterized protein C1orf198<br>OS=Homo sapiens GN=C1orf198<br>PE=1 SV=1 - [CA198_HUMAN]                         |
| Q63ZY3 | 1.2919  | 0.3695  | 1.69E-06 | KANK2 | KN motif and ankyrin repeat<br>domain-containing protein 2<br>OS=Homo sapiens GN=KANK2<br>PE=1 SV=1 - [KANK2_HUMAN]  |
| P80723 | 1.3008  | 0.3794  | 1.78E-06 | BASP1 | Brain acid soluble protein 1<br>OS=Homo sapiens GN=BASP1 PE=1<br>SV=2 - [BASP1_HUMAN]                                |
| Q9H3M7 | 2.1120  | 1.0786  | 2.01E-06 | TXNIP | Thioredoxin-interacting protein<br>OS=Homo sapiens GN=TXNIP PE=1<br>SV=1 - [TXNIP_HUMAN]                             |
| P07996 | 1.2896  | 0.3669  | 2.03E-06 | TSP1  | Thrombospondin-1 OS=Homo<br>sapiens GN=THBS1 PE=1 SV=2 -<br>[TSP1_HUMAN]                                             |
| P29323 | 1.3810  | 0.4657  | 2.24E-06 | EPHB2 | Ephrin type-B receptor 2 OS=Homo<br>sapiens GN=EPHB2 PE=1 SV=5 -<br>[EPHB2_HUMAN]                                    |
| Q13011 | 1.2811  | 0.3574  | 2.24E-06 | ECH1  | Delta(3,5)-Delta(2,4)-dienoyl-CoA<br>isomerase, mitochondrial<br>OS=Homo sapiens GN=ECH1 PE=1<br>SV=2 - [ECH1_HUMAN] |
| Q9UL42 | 0.5957  | -0.7474 | 2.24E-06 | PNMA2 | Paraneoplastic antigen Ma2<br>OS=Homo sapiens GN=PNMA2<br>PE=1 SV=2 - [PNMA2_HUMAN]                                  |
| Q12884 | 1.3866  | 0.4716  | 2.30E-06 | SEPR  | Seprase OS=Homo sapiens GN=FAP<br>PE=1 SV=5 - [SEPR_HUMAN]                                                           |
| P05413 | 0.5977  | -0.7426 | 2.39E-06 | FABPH | Fatty acid-binding protein, heart<br>OS=Homo sapiens GN=FABP3 PE=1<br>SV=4 - [FABPH_HUMAN]                           |
| Q02952 | 0.7592  | -0.3974 | 2.39E-06 | AKA12 | A-kinase anchor protein 12<br>OS=Homo sapiens GN=AKAP12<br>PE=1 SV=4 - [AKA12_HUMAN]                                 |
| Q15848 | 59.0665 | 5.8843  | 2.66E-06 | ADIPO | Adiponectin OS=Homo sapiens<br>GN=ADIPOQ PE=1 SV=1 -<br>[ADIPO_HUMAN]                                                |
| Q9Y4K0 | 0.6475  | -0.6271 | 2.74E-06 | LOXL2 | Lysyl oxidase homolog 2 OS=Homo<br>sapiens GN=LOXL2 PE=1 SV=1 -<br>[LOXL2_HUMAN]                                     |
| Q01813 | 1.2020  | 0.2654  | 2.89E-06 | K6PP  | 6-phosphofructokinase type C<br>OS=Homo sapiens GN=PFKP PE=1<br>SV=2 - [K6PP_HUMAN]                                  |
| P05997 | 0.7931  | -0.3345 | 2.95E-06 | CO5A2 | Collagen alpha-2(V) chain<br>OS=Homo sapiens GN=COL5A2<br>PE=1 SV=3 - [CO5A2_HUMAN]                                  |

|        |         |         |          |       |                                                                                                                       |
|--------|---------|---------|----------|-------|-----------------------------------------------------------------------------------------------------------------------|
| P07099 | 1.4352  | 0.5213  | 2.95E-06 | HYEP  | Epoxide hydrolase 1 OS=Homo sapiens GN=EPHX1 PE=1 SV=1 - [HYEP_HUMAN]                                                 |
| P17813 | 1.4295  | 0.5155  | 3.37E-06 | EGLN  | Endoglin OS=Homo sapiens GN=ENG PE=1 SV=2 - [EGLN_HUMAN]                                                              |
| Q99959 | 0.8206  | -0.2853 | 3.41E-06 | PKP2  | Plakophilin-2 OS=Homo sapiens GN=PKP2 PE=1 SV=2 - [PKP2_HUMAN]                                                        |
| P09936 | 1.1774  | 0.2356  | 3.42E-06 | UCHL1 | Ubiquitin carboxyl-terminal hydrolase isozyme L1 OS=Homo sapiens GN=UCHL1 PE=1 SV=2 - [UCHL1_HUMAN]                   |
| P50151 | 1.4437  | 0.5298  | 3.50E-06 | GBG10 | Guanine nucleotide-binding protein G(I)/G(S)/G(O) subunit gamma-10 OS=Homo sapiens GN=GNG10 PE=1 SV=1 - [GBG10_HUMAN] |
| P06737 | 1.1781  | 0.2365  | 3.54E-06 | PYGL  | Glycogen phosphorylase, liver form OS=Homo sapiens GN=PYGL PE=1 SV=4 - [PYGL_HUMAN]                                   |
| P00748 | 10.7906 | 3.4317  | 3.60E-06 | FA12  | Coagulation factor XII OS=Homo sapiens GN=F12 PE=1 SV=3 - [FA12_HUMAN]                                                |
| P35442 | 1.4740  | 0.5597  | 3.71E-06 | TSP2  | Thrombospondin-2 OS=Homo sapiens GN=THBS2 PE=1 SV=2 - [TSP2_HUMAN]                                                    |
| O95833 | 1.3575  | 0.4409  | 3.71E-06 | CLIC3 | Chloride intracellular channel protein 3 OS=Homo sapiens GN=CLIC3 PE=1 SV=2 - [CLIC3_HUMAN]                           |
| O14682 | 0.4046  | -1.3056 | 3.71E-06 | ENC1  | Ectoderm-neural cortex protein 1 OS=Homo sapiens GN=ENC1 PE=1 SV=2 - [ENC1_HUMAN]                                     |
| O43520 | 0.6445  | -0.6337 | 4.06E-06 | AT8B1 | Probable phospholipid-transporting ATPase IC OS=Homo sapiens GN=ATP8B1 PE=1 SV=3 - [AT8B1_HUMAN]                      |
| Q9NP74 | 0.6202  | -0.6891 | 4.06E-06 | PALMD | Palmdelphin OS=Homo sapiens GN=PALMD PE=1 SV=1 - [PALMD_HUMAN]                                                        |
| P63218 | 1.3184  | 0.3988  | 4.06E-06 | GBG5  | Guanine nucleotide-binding protein G(I)/G(S)/G(O) subunit gamma-5 OS=Homo sapiens GN=GNG5 PE=1 SV=3 - [GBG5_HUMAN]    |
| P18084 | 1.3303  | 0.4118  | 4.09E-06 | ITB5  | Integrin beta-5 OS=Homo sapiens GN=ITGB5 PE=1 SV=1 - [ITB5_HUMAN]                                                     |
| Q15437 | 0.7522  | -0.4109 | 4.21E-06 | SC23B | Protein transport protein Sec23B OS=Homo sapiens GN=SEC23B PE=1 SV=2 - [SC23B_HUMAN]                                  |
| Q96I59 | 1.7556  | 0.8120  | 4.21E-06 | SYNM  | Probable asparagine--tRNA ligase, mitochondrial OS=Homo sapiens GN=NARS2 PE=1 SV=3 - [SYNM_HUMAN]                     |
| P07951 | 1.2672  | 0.3416  | 4.33E-06 | TPM2  | Tropomyosin beta chain OS=Homo sapiens GN=TPM2 PE=1 SV=1 - [TPM2_HUMAN]                                               |
| P05546 | 28.0465 | 4.8098  | 4.33E-06 | HEP2  | Heparin cofactor 2 OS=Homo sapiens GN=SERPIND1 PE=1 SV=3 - [HEP2_HUMAN]                                               |

|        |         |         |          |       |                                                                                                               |
|--------|---------|---------|----------|-------|---------------------------------------------------------------------------------------------------------------|
| P12277 | 1.2972  | 0.3754  | 4.42E-06 | KCRB  | Creatine kinase B-type OS=Homo sapiens GN=CKB PE=1 SV=1 - [KCRB_HUMAN]                                        |
| P48681 | 0.7892  | -0.3416 | 4.54E-06 | NEST  | Nestin OS=Homo sapiens GN=NES PE=1 SV=2 - [NEST_HUMAN]                                                        |
| Q01082 | 0.8525  | -0.2302 | 5.20E-06 | SPTB2 | Spectrin beta chain, non-erythrocytic 1 OS=Homo sapiens GN=SPTBN1 PE=1 SV=2 - [SPTB2_HUMAN]                   |
| Q9C0C2 | 0.8185  | -0.2889 | 5.20E-06 | TB182 | 182 kDa tankyrase-1-binding protein OS=Homo sapiens GN=TNKS1BP1 PE=1 SV=4 - [TB182_HUMAN]                     |
| Q99685 | 0.7670  | -0.3828 | 5.24E-06 | MGLL  | Monoglyceride lipase OS=Homo sapiens GN=MGLL PE=1 SV=2 - [MGLL_HUMAN]                                         |
| P00747 | 9.6580  | 3.2717  | 5.35E-06 | PLMN  | Plasminogen OS=Homo sapiens GN=PLG PE=1 SV=2 - [PLMN_HUMAN]                                                   |
| Q02818 | 1.1637  | 0.2187  | 5.40E-06 | NUCB1 | Nucleobindin-1 OS=Homo sapiens GN=NUCB1 PE=1 SV=4 - [NUCB1_HUMAN]                                             |
| P02671 | 2.7706  | 1.4702  | 5.44E-06 | FIBA  | Fibrinogen alpha chain OS=Homo sapiens GN=FGA PE=1 SV=2 - [FIBA_HUMAN]                                        |
| Q8WWI1 | 0.8266  | -0.2747 | 5.45E-06 | LMO7  | LIM domain only protein 7 OS=Homo sapiens GN=LMO7 PE=1 SV=3 - [LMO7_HUMAN]                                    |
| Q6UVK1 | 1.1959  | 0.2581  | 5.63E-06 | CSPG4 | Chondroitin sulfate proteoglycan 4 OS=Homo sapiens GN=CSPG4 PE=1 SV=2 - [CSPG4_HUMAN]                         |
| Q9P0V3 | 0.7184  | -0.4772 | 5.63E-06 | SH3B4 | SH3 domain-binding protein 4 OS=Homo sapiens GN=SH3BP4 PE=1 SV=1 - [SH3B4_HUMAN]                              |
| P11413 | 1.2042  | 0.2681  | 5.72E-06 | G6PD  | Glucose-6-phosphate 1-dehydrogenase OS=Homo sapiens GN=G6PD PE=1 SV=4 - [G6PD_HUMAN]                          |
| P04003 | 37.5267 | 5.2298  | 5.72E-06 | C4BPA | C4b-binding protein alpha chain OS=Homo sapiens GN=C4BPA PE=1 SV=2 - [C4BPA_HUMAN]                            |
| P19823 | 19.2516 | 4.2669  | 5.79E-06 | ITIH2 | Inter-alpha-trypsin inhibitor heavy chain H2 OS=Homo sapiens GN=ITIH2 PE=1 SV=2 - [ITIH2_HUMAN]               |
| P51911 | 1.3864  | 0.4714  | 6.24E-06 | CNN1  | Calponin-1 OS=Homo sapiens GN=CNN1 PE=1 SV=2 - [CNN1_HUMAN]                                                   |
| P53814 | 0.7766  | -0.3648 | 6.24E-06 | SMTN  | Smoothelin OS=Homo sapiens GN=SMTN PE=1 SV=7 - [SMTN_HUMAN]                                                   |
| P78324 | 1.4400  | 0.5261  | 6.24E-06 | SHPS1 | Tyrosine-protein phosphatase non-receptor type substrate 1 OS=Homo sapiens GN=SIRPA PE=1 SV=2 - [SHPS1_HUMAN] |
| Q14624 | 12.8356 | 3.6821  | 6.31E-06 | ITIH4 | Inter-alpha-trypsin inhibitor heavy chain H4 OS=Homo sapiens GN=ITIH4 PE=1 SV=4 - [ITIH4_HUMAN]               |
| Q6ZMP0 | 0.5430  | -0.8810 | 6.33E-06 | THSD4 | Thrombospondin type-1 domain-containing protein 4 OS=Homo sapiens GN=THSD4 PE=2 SV=2 - [THSD4_HUMAN]          |

|        |         |         |          |       |                                                                                                                             |
|--------|---------|---------|----------|-------|-----------------------------------------------------------------------------------------------------------------------------|
| P26447 | 1.4116  | 0.4973  | 6.41E-06 | S10A4 | Protein S100-A4 OS=Homo sapiens<br>GN=S100A4 PE=1 SV=1 -<br>[S10A4_HUMAN]                                                   |
| P13611 | 1.3275  | 0.4087  | 6.44E-06 | CSPG2 | Versican core protein OS=Homo sapiens<br>GN=VCAN PE=1 SV=3 -<br>[CSPG2_HUMAN]                                               |
| P55287 | 1.1839  | 0.2436  | 6.44E-06 | CAD11 | Cadherin-11 OS=Homo sapiens<br>GN=CDH11 PE=1 SV=2 -<br>[CAD11_HUMAN]                                                        |
| P00403 | 1.1539  | 0.2065  | 6.63E-06 | COX2  | Cytochrome c oxidase subunit 2<br>OS=Homo sapiens GN=MT-CO2<br>PE=1 SV=1 - [COX2_HUMAN]                                     |
| P20020 | 0.6994  | -0.5158 | 6.63E-06 | AT2B1 | Plasma membrane calcium-transporting ATPase 1 OS=Homo sapiens<br>GN=ATP2B1 PE=1 SV=3 -<br>[AT2B1_HUMAN]                     |
| P19827 | 42.2616 | 5.4013  | 6.76E-06 | ITIH1 | Inter-alpha-trypsin inhibitor heavy chain H1 OS=Homo sapiens<br>GN=ITIH1 PE=1 SV=3 -<br>[ITIH1_HUMAN]                       |
| Q99985 | 2.0239  | 1.0172  | 6.86E-06 | SEM3C | Semaphorin-3C OS=Homo sapiens<br>GN=SEMA3C PE=1 SV=2 -<br>[SEM3C_HUMAN]                                                     |
| Q13308 | 1.5116  | 0.5961  | 7.66E-06 | PTK7  | Inactive tyrosine-protein kinase 7<br>OS=Homo sapiens GN=PTK7 PE=1<br>SV=2 - [PTK7_HUMAN]                                   |
| Q53FA7 | 1.2259  | 0.2939  | 8.94E-06 | QORX  | Quinone oxidoreductase PIG3<br>OS=Homo sapiens GN=TP53I3<br>PE=1 SV=2 - [QORX_HUMAN]                                        |
| P04792 | 1.2906  | 0.3680  | 9.14E-06 | HSPB1 | Heat shock protein beta-1<br>OS=Homo sapiens GN=HSPB1 PE=1<br>SV=2 - [HSPB1_HUMAN]                                          |
| Q8NCN5 | 2.2584  | 1.1753  | 9.29E-06 | PDPR  | Pyruvate dehydrogenase phosphatase regulatory subunit, mitochondrial OS=Homo sapiens<br>GN=PDPR PE=1 SV=2 -<br>[PDPR_HUMAN] |
| O95999 | 0.7718  | -0.3737 | 9.45E-06 | BCL10 | B-cell lymphoma/leukemia 10<br>OS=Homo sapiens GN=BCL10 PE=1<br>SV=1 - [BCL10_HUMAN]                                        |
| P21399 | 1.3716  | 0.4558  | 9.56E-06 | ACOC  | Cytoplasmic aconitate hydratase<br>OS=Homo sapiens GN=ACO1 PE=1<br>SV=3 - [ACOC_HUMAN]                                      |
| Q9UGM5 | 2.0233  | 1.0167  | 1.02E-05 | FETUB | Fetuin-B OS=Homo sapiens<br>GN=FETUB PE=1 SV=2 -<br>[FETUB_HUMAN]                                                           |
| P01591 | 3.4344  | 1.7801  | 1.05E-05 | IGJ   | Immunoglobulin J chain OS=Homo sapiens<br>GN=IGJ PE=1 SV=4 -<br>[IGJ_HUMAN]                                                 |
| Q96BZ9 | 1.7841  | 0.8352  | 1.05E-05 | TBC20 | TBC1 domain family member 20<br>OS=Homo sapiens GN=TBC1D20<br>PE=1 SV=1 - [TBC20_HUMAN]                                     |
| P02649 | 4.6000  | 2.2016  | 1.08E-05 | APOE  | Apolipoprotein E OS=Homo sapiens<br>GN=APOE PE=1 SV=1 -<br>[APOE_HUMAN]                                                     |
| Q9UI42 | 0.5842  | -0.7755 | 1.08E-05 | CBPA4 | Carboxypeptidase A4 OS=Homo sapiens<br>GN=CPA4 PE=1 SV=2 -<br>[CBPA4_HUMAN]                                                 |
| P29401 | 1.1810  | 0.2400  | 1.08E-05 | TKT   | Transketolase OS=Homo sapiens<br>GN=TKT PE=1 SV=3 -<br>[TKT_HUMAN]                                                          |
| P20337 | 1.2429  | 0.3137  | 1.08E-05 | RAB3B | Ras-related protein Rab-3B<br>OS=Homo sapiens GN=RAB3B<br>PE=1 SV=2 - [RAB3B_HUMAN]                                         |

|        |         |         |          |       |                                                                                                          |
|--------|---------|---------|----------|-------|----------------------------------------------------------------------------------------------------------|
| P02647 | 38.7522 | 5.2762  | 1.10E-05 | APOA1 | Apolipoprotein A-I OS=Homo sapiens GN=APOA1 PE=1 SV=1 - [APOA1_HUMAN]                                    |
| O94925 | 1.4083  | 0.4940  | 1.14E-05 | GLSK  | Glutaminase kidney isoform, mitochondrial OS=Homo sapiens GN=GLS PE=1 SV=1 - [GLSK_HUMAN]                |
| P01625 | 8.5705  | 3.0994  | 1.16E-05 | KV402 | Ig kappa chain V-IV region Len OS=Homo sapiens PE=1 SV=2 - [KV402_HUMAN]                                 |
| Q13620 | 0.8216  | -0.2834 | 1.22E-05 | CUL4B | Cullin-4B OS=Homo sapiens GN=CUL4B PE=1 SV=4 - [CUL4B_HUMAN]                                             |
| Q9H3K2 | 1.3528  | 0.4359  | 1.22E-05 | GHITM | Growth hormone-inducible transmembrane protein OS=Homo sapiens GN=GHITM PE=1 SV=2 - [GHITM_HUMAN]        |
| P80748 | 63.9019 | 5.9978  | 1.23E-05 | LV302 | Ig lambda chain V-III region LOI OS=Homo sapiens PE=1 SV=1 - [LV302_HUMAN]                               |
| P10909 | 2.9266  | 1.5492  | 1.23E-05 | CLUS  | Clusterin OS=Homo sapiens GN=CLU PE=1 SV=1 - [CLUS_HUMAN]                                                |
| Q8N568 | 1.4794  | 0.5650  | 1.24E-05 | DCLK2 | Serine/threonine-protein kinase DCLK2 OS=Homo sapiens GN=DCLK2 PE=2 SV=4 - [DCLK2_HUMAN]                 |
| P02790 | 21.8555 | 4.4499  | 1.25E-05 | HEMO  | Hemopexin OS=Homo sapiens GN=HPX PE=1 SV=2 - [HEMO_HUMAN]                                                |
| Q16706 | 0.7132  | -0.4876 | 1.25E-05 | MA2A1 | Alpha-mannosidase 2 OS=Homo sapiens GN=MAN2A1 PE=1 SV=2 - [MA2A1_HUMAN]                                  |
| Q9UBB4 | 0.7681  | -0.3807 | 1.25E-05 | ATX10 | Ataxin-10 OS=Homo sapiens GN=ATXN10 PE=1 SV=1 - [ATX10_HUMAN]                                            |
| P50454 | 1.1711  | 0.2279  | 1.25E-05 | SERPH | Serpin H1 OS=Homo sapiens GN=SERPINH1 PE=1 SV=2 - [SERPH_HUMAN]                                          |
| Q9NZN4 | 0.7275  | -0.4589 | 1.25E-05 | EHD2  | EH domain-containing protein 2 OS=Homo sapiens GN=EHD2 PE=1 SV=2 - [EHD2_HUMAN]                          |
| P47985 | 1.1496  | 0.2011  | 1.25E-05 | UCRI  | Cytochrome b-c1 complex subunit Rieske, mitochondrial OS=Homo sapiens GN=UQCRC1 PE=1 SV=2 - [UCRI_HUMAN] |
| P04035 | 0.3540  | -1.4983 | 1.25E-05 | HMDH  | 3-hydroxy-3-methylglutaryl-coenzyme A reductase OS=Homo sapiens GN=HMGCR PE=1 SV=1 - [HMDH_HUMAN]        |
| P17936 | 2.0903  | 1.0637  | 1.28E-05 | IBP3  | Insulin-like growth factor-binding protein 3 OS=Homo sapiens GN=IGFBP3 PE=1 SV=2 - [IBP3_HUMAN]          |
| P06280 | 1.2545  | 0.3271  | 1.30E-05 | AGAL  | Alpha-galactosidase A OS=Homo sapiens GN=GLA PE=1 SV=1 - [AGAL_HUMAN]                                    |
| P36776 | 1.1743  | 0.2317  | 1.34E-05 | LONM  | Lon protease homolog, mitochondrial OS=Homo sapiens GN=LONP1 PE=1 SV=2 - [LONM_HUMAN]                    |
| P83881 | 0.8317  | -0.2659 | 1.34E-05 | RL36A | 60S ribosomal protein L36a OS=Homo sapiens GN=RPL36A PE=1 SV=2 - [RL36A_HUMAN]                           |

|        |         |         |          |       |                                                                                                                   |
|--------|---------|---------|----------|-------|-------------------------------------------------------------------------------------------------------------------|
| O14495 | 2.6670  | 1.4152  | 1.38E-05 | LPP3  | Lipid phosphate phosphohydrolase 3 OS=Homo sapiens GN=PPAP2B PE=1 SV=1 - [LPP3_HUMAN]                             |
| Q5TCZ1 | 1.2490  | 0.3208  | 1.38E-05 | SPD2A | SH3 and PX domain-containing protein 2A OS=Homo sapiens GN=SH3PXD2A PE=1 SV=1 - [SPD2A_HUMAN]                     |
| P30837 | 1.2653  | 0.3395  | 1.38E-05 | AL1B1 | Aldehyde dehydrogenase X, mitochondrial OS=Homo sapiens GN=ALDH1B1 PE=1 SV=3 - [AL1B1_HUMAN]                      |
| P36969 | 2.6278  | 1.3939  | 1.40E-05 | GPX4  | Phospholipid hydroperoxide glutathione peroxidase, mitochondrial OS=Homo sapiens GN=GPX4 PE=1 SV=3 - [GPX4_HUMAN] |
| P35221 | 1.1693  | 0.2257  | 1.50E-05 | CTNA1 | Catenin alpha-1 OS=Homo sapiens GN=CTNNA1 PE=1 SV=1 - [CTNA1_HUMAN]                                               |
| P16989 | 0.8178  | -0.2902 | 1.51E-05 | YBOX3 | Y-box-binding protein 3 OS=Homo sapiens GN=YBX3 PE=1 SV=4 - [YBOX3_HUMAN]                                         |
| P17812 | 1.3060  | 0.3851  | 1.51E-05 | PYRG1 | CTP synthase 1 OS=Homo sapiens GN=CTPS1 PE=1 SV=2 - [PYRG1_HUMAN]                                                 |
| P02760 | 10.7832 | 3.4307  | 1.51E-05 | AMBP  | Protein AMBP OS=Homo sapiens GN=AMBP PE=1 SV=1 - [AMBP_HUMAN]                                                     |
| Q92974 | 0.8018  | -0.3187 | 1.53E-05 | ARHG2 | Rho guanine nucleotide exchange factor 2 OS=Homo sapiens GN=ARHGEF2 PE=1 SV=4 - [ARHG2_HUMAN]                     |
| P46060 | 0.8002  | -0.3216 | 1.56E-05 | RAGP1 | Ran GTPase-activating protein 1 OS=Homo sapiens GN=RANGAP1 PE=1 SV=1 - [RAGP1_HUMAN]                              |
| Q15392 | 1.3659  | 0.4498  | 1.56E-05 | DHC24 | Delta(24)-sterol reductase OS=Homo sapiens GN=DHCR24 PE=1 SV=2 - [DHC24_HUMAN]                                    |
| O15254 | 1.3133  | 0.3932  | 1.60E-05 | ACOX3 | Peroxisomal acyl-coenzyme A oxidase 3 OS=Homo sapiens GN=ACOX3 PE=1 SV=2 - [ACOX3_HUMAN]                          |
| P01617 | 6.4992  | 2.7003  | 1.64E-05 | KV204 | Ig kappa chain V-II region TEW OS=Homo sapiens PE=1 SV=1 - [KV204_HUMAN]                                          |
| O96000 | 1.1733  | 0.2306  | 1.66E-05 | NDUBA | NADH dehydrogenase [ubiquinone] 1 beta subcomplex subunit 10 OS=Homo sapiens GN=NDUFB10 PE=1 SV=3 - [NDUBA_HUMAN] |
| Q9UL41 | 0.5690  | -0.8135 | 1.73E-05 | PNMA3 | Paraneoplastic antigen Ma3 OS=Homo sapiens GN=PNMA3 PE=2 SV=2 - [PNMA3_HUMAN]                                     |
| O94851 | 0.7941  | -0.3326 | 1.73E-05 | MICA2 | Protein-methionine sulfoxide oxidase MICAL2 OS=Homo sapiens GN=MICAL2 PE=1 SV=1 - [MICA2_HUMAN]                   |
| POC0L5 | 8.3044  | 3.0539  | 1.74E-05 | CO4B  | Complement C4-B OS=Homo sapiens GN=C4B PE=1 SV=2 - [CO4B_HUMAN]                                                   |
| Q9BV36 | 0.4762  | -1.0705 | 1.74E-05 | MELPH | Melanophilin OS=Homo sapiens GN=MLPH PE=1 SV=1 - [MELPH_HUMAN]                                                    |

|        |         |         |          |       |                                                                                                                              |
|--------|---------|---------|----------|-------|------------------------------------------------------------------------------------------------------------------------------|
| P00738 | 4.1512  | 2.0535  | 1.80E-05 | HPT   | Haptoglobin OS=Homo sapiens<br>GN=HP PE=1 SV=1 - [HPT_HUMAN]                                                                 |
| O95163 | 0.8034  | -0.3159 | 1.80E-05 | ELP1  | Elongator complex protein 1<br>OS=Homo sapiens GN=IKBKAP<br>PE=1 SV=3 - [ELP1_HUMAN]                                         |
| Q76M96 | 1.5819  | 0.6617  | 1.80E-05 | CCD80 | Coiled-coil domain-containing<br>protein 80 OS=Homo sapiens<br>GN=CCDC80 PE=1 SV=1 -<br>[CCD80_HUMAN]                        |
| P55058 | 1.7552  | 0.8117  | 1.84E-05 | PLTP  | Phospholipid transfer protein<br>OS=Homo sapiens GN=PLTP PE=1<br>SV=1 - [PLTP_HUMAN]                                         |
| P42330 | 1.7337  | 0.7939  | 1.86E-05 | AK1C3 | Aldo-keto reductase family 1<br>member C3 OS=Homo sapiens<br>GN=AKR1C3 PE=1 SV=4 -<br>[AK1C3_HUMAN]                          |
| P01766 | 28.2087 | 4.8181  | 1.87E-05 | HV305 | Ig heavy chain V-III region BRO<br>OS=Homo sapiens PE=1 SV=1 -<br>[HV305_HUMAN]                                              |
| Q6IQ49 | 0.7161  | -0.4818 | 1.89E-05 | SDE2  | Protein SDE2 homolog OS=Homo<br>sapiens GN=SDE2 PE=1 SV=1 -<br>[SDE2_HUMAN]                                                  |
| P01859 | 20.5097 | 4.3582  | 1.89E-05 | IGHG2 | Ig gamma-2 chain C region<br>OS=Homo sapiens GN=IGHG2 PE=1<br>SV=2 - [IGHG2_HUMAN]                                           |
| P01834 | 49.4669 | 5.6284  | 1.91E-05 | IGKC  | Ig kappa chain C region OS=Homo<br>sapiens GN=IGKC PE=1 SV=1 -<br>[IGKC_HUMAN]                                               |
| P01024 | 8.8622  | 3.1477  | 1.93E-05 | CO3   | Complement C3 OS=Homo sapiens<br>GN=C3 PE=1 SV=2 - [CO3_HUMAN]                                                               |
| P01876 | 58.2074 | 5.8631  | 1.95E-05 | IGHA1 | Ig alpha-1 chain C region OS=Homo<br>sapiens GN=IGHA1 PE=1 SV=2 -<br>[IGHA1_HUMAN]                                           |
| P0CG05 | 55.1186 | 5.7845  | 2.00E-05 | LAC2  | Ig lambda-2 chain C regions<br>OS=Homo sapiens GN=IGLC2 PE=1<br>SV=1 - [LAC2_HUMAN]                                          |
| P04114 | 23.4051 | 4.5488  | 2.00E-05 | APOB  | Apolipoprotein B-100 OS=Homo<br>sapiens GN=APOB PE=1 SV=2 -<br>[APOB_HUMAN]                                                  |
| O43854 | 1.3117  | 0.3915  | 2.01E-05 | EDIL3 | EGF-like repeat and discoidin I-like<br>domain-containing protein 3<br>OS=Homo sapiens GN=EDIL3 PE=1<br>SV=1 - [EDIL3_HUMAN] |
| P15121 | 1.3110  | 0.3906  | 2.08E-05 | ALDR  | Aldose reductase OS=Homo<br>sapiens GN=AKR1B1 PE=1 SV=3 -<br>[ALDR_HUMAN]                                                    |
| Q13884 | 0.8505  | -0.2337 | 2.18E-05 | SNTB1 | Beta-1-syntrophin OS=Homo<br>sapiens GN=SNTB1 PE=1 SV=3 -<br>[SNTB1_HUMAN]                                                   |
| P02787 | 3.2018  | 1.6789  | 2.22E-05 | TRFE  | Serotransferrin OS=Homo sapiens<br>GN=TF PE=1 SV=3 -<br>[TRFE_HUMAN]                                                         |
| Q9BYN0 | 1.4997  | 0.5847  | 2.24E-05 | SRXN1 | Sulfiredoxin-1 OS=Homo sapiens<br>GN=SRXN1 PE=1 SV=2 -<br>[SRXN1_HUMAN]                                                      |
| P42765 | 1.2330  | 0.3022  | 2.28E-05 | THIM  | 3-ketoacyl-CoA thiolase,<br>mitochondrial OS=Homo sapiens<br>GN=ACAA2 PE=1 SV=2 -<br>[THIM_HUMAN]                            |
| P07339 | 1.1945  | 0.2564  | 2.29E-05 | CATD  | Cathepsin D OS=Homo sapiens<br>GN=CTSD PE=1 SV=1 -<br>[CATD_HUMAN]                                                           |

|        |         |         |          |       |                                                                                                |
|--------|---------|---------|----------|-------|------------------------------------------------------------------------------------------------|
| Q8N5W9 | 2.0546  | 1.0389  | 2.30E-05 | F101B | Protein FAM101B OS=Homo sapiens GN=FAM101B PE=1 SV=1 - [F101B_HUMAN]                           |
| O95983 | 0.8337  | -0.2624 | 2.36E-05 | MBD3  | Methyl-CpG-binding domain protein 3 OS=Homo sapiens GN=MBD3 PE=1 SV=1 - [MBD3_HUMAN]           |
| P33992 | 0.6815  | -0.5533 | 2.45E-05 | MCM5  | DNA replication licensing factor MCM5 OS=Homo sapiens GN=MCM5 PE=1 SV=5 - [MCM5_HUMAN]         |
| Q5JRX3 | 1.1491  | 0.2005  | 2.48E-05 | PREP  | Presequence protease, mitochondrial OS=Homo sapiens GN=PITRM1 PE=1 SV=3 - [PREP_HUMAN]         |
| Q9BWD1 | 0.7763  | -0.3654 | 2.48E-05 | THIC  | Acetyl-CoA acetyltransferase, cytosolic OS=Homo sapiens GN=ACAT2 PE=1 SV=2 - [THIC_HUMAN]      |
| O14791 | 17.1240 | 4.0979  | 2.67E-05 | APOL1 | Apolipoprotein L1 OS=Homo sapiens GN=APOL1 PE=1 SV=5 - [APOL1_HUMAN]                           |
| P04278 | 13.3612 | 3.7400  | 2.68E-05 | SHBG  | Sex hormone-binding globulin OS=Homo sapiens GN=SHBG PE=1 SV=2 - [SHBG_HUMAN]                  |
| P05155 | 14.4334 | 3.8513  | 2.70E-05 | IC1   | Plasma protease C1 inhibitor OS=Homo sapiens GN=SERPING1 PE=1 SV=2 - [IC1_HUMAN]               |
| POCOL4 | 7.6905  | 2.9431  | 2.72E-05 | CO4A  | Complement C4-A OS=Homo sapiens GN=C4A PE=1 SV=2 - [CO4A_HUMAN]                                |
| P47914 | 0.7141  | -0.4859 | 2.81E-05 | RL29  | 60S ribosomal protein L29 OS=Homo sapiens GN=RPL29 PE=1 SV=2 - [RL29_HUMAN]                    |
| P00966 | 1.2734  | 0.3487  | 2.81E-05 | ASSY  | Argininosuccinate synthase OS=Homo sapiens GN=ASS1 PE=1 SV=2 - [ASSY_HUMAN]                    |
| P07602 | 1.1994  | 0.2624  | 2.81E-05 | SAP   | Proactivator polypeptide OS=Homo sapiens GN=PSAP PE=1 SV=2 - [SAP_HUMAN]                       |
| O43491 | 0.8347  | -0.2607 | 2.84E-05 | E41L2 | Band 4.1-like protein 2 OS=Homo sapiens GN=EPB41L2 PE=1 SV=1 - [E41L2_HUMAN]                   |
| P52895 | 1.8118  | 0.8575  | 2.84E-05 | AK1C2 | Aldo-keto reductase family 1 member C2 OS=Homo sapiens GN=AKR1C2 PE=1 SV=3 - [AK1C2_HUMAN]     |
| P17301 | 1.2175  | 0.2839  | 3.10E-05 | ITA2  | Integrin alpha-2 OS=Homo sapiens GN=ITGA2 PE=1 SV=1 - [ITA2_HUMAN]                             |
| Q86TX2 | 1.1871  | 0.2475  | 3.24E-05 | ACOT1 | Acyl-coenzyme A thioesterase 1 OS=Homo sapiens GN=ACOT1 PE=1 SV=1 - [ACOT1_HUMAN]              |
| Q08357 | 0.7320  | -0.4502 | 3.24E-05 | S20A2 | Sodium-dependent phosphate transporter 2 OS=Homo sapiens GN=SLC20A2 PE=1 SV=1 - [S20A2_HUMAN]  |
| P48507 | 1.2878  | 0.3650  | 3.24E-05 | GSH0  | Glutamate--cysteine ligase regulatory subunit OS=Homo sapiens GN=GCLM PE=1 SV=1 - [GSH0_HUMAN] |



|        |        |         |          |       |                                                                                                                        |
|--------|--------|---------|----------|-------|------------------------------------------------------------------------------------------------------------------------|
| Q07817 | 0.7231 | -0.4678 | 3.29E-05 | B2CL1 | Bcl-2-like protein 1 OS=Homo sapiens GN=BCL2L1 PE=1 SV=1 - [B2CL1_HUMAN]                                               |
| Q8IWU6 | 0.7998 | -0.3224 | 3.30E-05 | SULF1 | Extracellular sulfatase Sulf-1 OS=Homo sapiens GN=SULF1 PE=1 SV=1 - [SULF1_HUMAN]                                      |
| P12111 | 0.7228 | -0.4683 | 3.39E-05 | CO6A3 | Collagen alpha-3(VI) chain OS=Homo sapiens GN=COL6A3 PE=1 SV=5 - [CO6A3_HUMAN]                                         |
| Q9NUQ6 | 0.8267 | -0.2746 | 3.39E-05 | SPS2L | SPATS2-like protein OS=Homo sapiens GN=SPATS2L PE=1 SV=2 - [SPS2L_HUMAN]                                               |
| Q15327 | 0.4854 | -1.0427 | 3.39E-05 | ANKR1 | Ankyrin repeat domain-containing protein 1 OS=Homo sapiens GN=ANKRD1 PE=1 SV=2 - [ANKR1_HUMAN]                         |
| Q9HAV4 | 0.8095 | -0.3049 | 3.44E-05 | XPO5  | Exportin-5 OS=Homo sapiens GN=XPO5 PE=1 SV=1 - [XPO5_HUMAN]                                                            |
| Q9UG63 | 0.8462 | -0.2409 | 3.44E-05 | ABCF2 | ATP-binding cassette sub-family F member 2 OS=Homo sapiens GN=ABCF2 PE=1 SV=2 - [ABCF2_HUMAN]                          |
| P05106 | 1.3463 | 0.4291  | 3.48E-05 | ITB3  | Integrin beta-3 OS=Homo sapiens GN=ITGB3 PE=1 SV=2 - [ITB3_HUMAN]                                                      |
| Q14690 | 0.8276 | -0.2730 | 3.50E-05 | RRP5  | Protein RRP5 homolog OS=Homo sapiens GN=PDCD11 PE=1 SV=3 - [RRP5_HUMAN]                                                |
| P13073 | 1.1545 | 0.2073  | 3.53E-05 | COX41 | Cytochrome c oxidase subunit 4 isoform 1, mitochondrial OS=Homo sapiens GN=COX411 PE=1 SV=1 - [COX41_HUMAN]            |
| Q3KQU3 | 0.8321 | -0.2652 | 3.55E-05 | MA7D1 | MAP7 domain-containing protein 1 OS=Homo sapiens GN=MAP7D1 PE=1 SV=1 - [MA7D1_HUMAN]                                   |
| P12235 | 1.2377 | 0.3076  | 3.61E-05 | ADT1  | ADP/ATP translocase 1 OS=Homo sapiens GN=SLC25A4 PE=1 SV=4 - [ADT1_HUMAN]                                              |
| Q9BZF9 | 0.7826 | -0.3536 | 3.61E-05 | UACA  | Uveal autoantigen with coiled-coil domains and ankyrin repeats OS=Homo sapiens GN=UACA PE=1 SV=2 - [UACA_HUMAN]        |
| P17844 | 0.8317 | -0.2659 | 3.62E-05 | DDX5  | Probable ATP-dependent RNA helicase DDX5 OS=Homo sapiens GN=DDX5 PE=1 SV=1 - [DDX5_HUMAN]                              |
| Q9Y6Q2 | 1.5825 | 0.6622  | 3.67E-05 | STON1 | Stonin-1 OS=Homo sapiens GN=STON1 PE=1 SV=2 - [STON1_HUMAN]                                                            |
| Q70E73 | 0.7855 | -0.3483 | 3.70E-05 | RAPH1 | Ras-associated and pleckstrin homology domains-containing protein 1 OS=Homo sapiens GN=RAPH1 PE=1 SV=3 - [RAPH1_HUMAN] |
| Q2NL82 | 0.8386 | -0.2539 | 3.70E-05 | TSR1  | Pre-rRNA-processing protein TSR1 homolog OS=Homo sapiens GN=TSR1 PE=1 SV=1 - [TSR1_HUMAN]                              |
| P19022 | 1.3053 | 0.3843  | 3.72E-05 | CADH2 | Cadherin-2 OS=Homo sapiens GN=CDH2 PE=1 SV=4 - [CADH2_HUMAN]                                                           |

|        |        |         |          |       |                                                                                                                           |
|--------|--------|---------|----------|-------|---------------------------------------------------------------------------------------------------------------------------|
| Q16134 | 1.1569 | 0.2102  | 3.73E-05 | ETFD  | Electron transfer flavoprotein-ubiquinone oxidoreductase, mitochondrial OS=Homo sapiens GN=ETFDH PE=1 SV=2 - [ETFD_HUMAN] |
| Q9NVU7 | 0.8140 | -0.2968 | 3.73E-05 | SDA1  | Protein SDA1 homolog OS=Homo sapiens GN=SDAD1 PE=1 SV=3 - [SDA1_HUMAN]                                                    |
| Q86V21 | 0.8143 | -0.2963 | 3.73E-05 | AACS  | Acetoacetyl-CoA synthetase OS=Homo sapiens GN=AACS PE=1 SV=1 - [AACS_HUMAN]                                               |
| Q02388 | 1.5683 | 0.6492  | 3.81E-05 | CO7A1 | Collagen alpha-1(VII) chain OS=Homo sapiens GN=COL7A1 PE=1 SV=2 - [CO7A1_HUMAN]                                           |
| Q6EMK4 | 1.6275 | 0.7026  | 3.82E-05 | VASN  | Vasorin OS=Homo sapiens GN=VASN PE=1 SV=1 - [VASN_HUMAN]                                                                  |
| O95980 | 1.3310 | 0.4125  | 3.98E-05 | RECK  | Reversion-inducing cysteine-rich protein with Kazal motifs OS=Homo sapiens GN=RECK PE=1 SV=1 - [RECK_HUMAN]               |
| P10619 | 1.1818 | 0.2410  | 4.07E-05 | PPGB  | Lysosomal protective protein OS=Homo sapiens GN=CTSA PE=1 SV=2 - [PPGB_HUMAN]                                             |
| Q9H857 | 1.2493 | 0.3212  | 4.21E-05 | NT5D2 | 5'-nucleotidase domain-containing protein 2 OS=Homo sapiens GN=NT5DC2 PE=1 SV=1 - [NT5D2_HUMAN]                           |
| Q52LW3 | 0.7895 | -0.3411 | 4.26E-05 | RHG29 | Rho GTPase-activating protein 29 OS=Homo sapiens GN=ARHGAP29 PE=1 SV=2 - [RHG29_HUMAN]                                    |
| P00390 | 1.2038 | 0.2676  | 4.28E-05 | GSHR  | Glutathione reductase, mitochondrial OS=Homo sapiens GN=GSR PE=1 SV=2 - [GSHR_HUMAN]                                      |
| Q9BWS9 | 1.1863 | 0.2464  | 4.33E-05 | CHID1 | Chitinase domain-containing protein 1 OS=Homo sapiens GN=CHID1 PE=1 SV=1 - [CHID1_HUMAN]                                  |
| P28065 | 0.8432 | -0.2460 | 4.49E-05 | PSB9  | Proteasome subunit beta type-9 OS=Homo sapiens GN=PSMB9 PE=1 SV=2 - [PSB9_HUMAN]                                          |
| P07093 | 1.3555 | 0.4388  | 4.49E-05 | GDN   | Glia-derived nexin OS=Homo sapiens GN=SERPINE2 PE=1 SV=1 - [GDN_HUMAN]                                                    |
| Q9UHG3 | 1.1509 | 0.2027  | 4.49E-05 | PCYOX | Prenylcysteine oxidase 1 OS=Homo sapiens GN=PCYOX1 PE=1 SV=3 - [PCYOX_HUMAN]                                              |
| P60891 | 1.3180 | 0.3984  | 4.49E-05 | PRPS1 | Ribose-phosphate pyrophosphokinase 1 OS=Homo sapiens GN=PRPS1 PE=1 SV=2 - [PRPS1_HUMAN]                                   |
| Q96PD2 | 0.6643 | -0.5901 | 4.53E-05 | DCBD2 | Discoidin, CUB and LCCL domain-containing protein 2 OS=Homo sapiens GN=DCBLD2 PE=1 SV=1 - [DCBD2_HUMAN]                   |
| Q9P265 | 1.1616 | 0.2161  | 4.61E-05 | DIP2B | Disco-interacting protein 2 homolog B OS=Homo sapiens GN=DIP2B PE=1 SV=3 - [DIP2B_HUMAN]                                  |
| P09601 | 1.8412 | 0.8806  | 4.70E-05 | HMOX1 | Heme oxygenase 1 OS=Homo sapiens GN=HMOX1 PE=1 SV=1 - [HMOX1_HUMAN]                                                       |

|        |        |         |          |       |                                                                                                       |
|--------|--------|---------|----------|-------|-------------------------------------------------------------------------------------------------------|
| P05091 | 1.2488 | 0.3206  | 4.70E-05 | ALDH2 | Aldehyde dehydrogenase, mitochondrial OS=Homo sapiens GN=ALDH2 PE=1 SV=2 - [ALDH2_HUMAN]              |
| Q96CM8 | 1.2167 | 0.2830  | 4.74E-05 | ACSF2 | Acyl-CoA synthetase family member 2, mitochondrial OS=Homo sapiens GN=ACSF2 PE=1 SV=2 - [ACSF2_HUMAN] |
| P37837 | 1.1940 | 0.2558  | 4.82E-05 | TALDO | Transaldolase OS=Homo sapiens GN=TALDO1 PE=1 SV=2 - [TALDO_HUMAN]                                     |
| Q96SB4 | 0.7642 | -0.3879 | 4.82E-05 | SRPK1 | SRSF protein kinase 1 OS=Homo sapiens GN=SRPK1 PE=1 SV=2 - [SRPK1_HUMAN]                              |
| P48163 | 1.2341 | 0.3034  | 4.95E-05 | MAOX  | NADP-dependent malic enzyme OS=Homo sapiens GN=ME1 PE=1 SV=1 - [MAOX_HUMAN]                           |
| Q9Y6C2 | 1.2533 | 0.3257  | 5.14E-05 | EMIL1 | EMILIN-1 OS=Homo sapiens GN=EMILIN1 PE=1 SV=2 - [EMIL1_HUMAN]                                         |
| P15144 | 1.2899 | 0.3673  | 5.15E-05 | AMPN  | Aminopeptidase N OS=Homo sapiens GN=ANPEP PE=1 SV=4 - [AMPN_HUMAN]                                    |
| Q14118 | 1.1822 | 0.2415  | 5.34E-05 | DAG1  | Dystroglycan OS=Homo sapiens GN=DAG1 PE=1 SV=2 - [DAG1_HUMAN]                                         |
| P08729 | 1.2086 | 0.2733  | 5.42E-05 | K2C7  | Keratin, type II cytoskeletal 7 OS=Homo sapiens GN=KRT7 PE=1 SV=5 - [K2C7_HUMAN]                      |
| Q9NR19 | 0.7878 | -0.3440 | 5.46E-05 | ACSA  | Acetyl-coenzyme A synthetase, cytoplasmic OS=Homo sapiens GN=ACSS2 PE=1 SV=1 - [ACSA_HUMAN]           |
| P01871 | 5.6268 | 2.4923  | 5.56E-05 | IGHM  | Ig mu chain C region OS=Homo sapiens GN=IGHM PE=1 SV=3 - [IGHM_HUMAN]                                 |
| Q96IG2 | 1.2162 | 0.2824  | 5.58E-05 | FXL20 | F-box/LRR-repeat protein 20 OS=Homo sapiens GN=FBXL20 PE=1 SV=2 - [FXL20_HUMAN]                       |
| Q9Y5Q0 | 1.2184 | 0.2850  | 5.70E-05 | FADS3 | Fatty acid desaturase 3 OS=Homo sapiens GN=FADS3 PE=2 SV=1 - [FADS3_HUMAN]                            |
| Q99650 | 1.3529 | 0.4360  | 5.74E-05 | OSMR  | Oncostatin-M-specific receptor subunit beta OS=Homo sapiens GN=OSMR PE=1 SV=1 - [OSMR_HUMAN]          |
| Q96J92 | 0.7124 | -0.4891 | 5.74E-05 | WNK4  | Serine/threonine-protein kinase WNK4 OS=Homo sapiens GN=WNK4 PE=1 SV=1 - [WNK4_HUMAN]                 |
| Q9Y394 | 1.1600 | 0.2141  | 5.74E-05 | DHRS7 | Dehydrogenase/reductase SDR family member 7 OS=Homo sapiens GN=DHRS7 PE=1 SV=1 - [DHRS7_HUMAN]        |
| Q9NR30 | 0.6855 | -0.5448 | 5.75E-05 | DDX21 | Nucleolar RNA helicase 2 OS=Homo sapiens GN=DDX21 PE=1 SV=5 - [DDX21_HUMAN]                           |
| Q8TC76 | 1.7179 | 0.7806  | 5.75E-05 | F110B | Protein FAM110B OS=Homo sapiens GN=FAM110B PE=1 SV=1 - [F110B_HUMAN]                                  |
| P15559 | 1.3118 | 0.3915  | 5.88E-05 | NQO1  | NAD(P)H dehydrogenase [quinone] 1 OS=Homo sapiens GN=NQO1 PE=1 SV=1 - [NQO1_HUMAN]                    |

|        |         |         |          |       |                                                                                                                |
|--------|---------|---------|----------|-------|----------------------------------------------------------------------------------------------------------------|
| 075027 | 1.1797  | 0.2385  | 5.88E-05 | ABCB7 | ATP-binding cassette sub-family B member 7, mitochondrial OS=Homo sapiens GN=ABCB7 PE=1 SV=2 - [ABCB7_HUMAN]   |
| Q8N5K1 | 0.7531  | -0.4091 | 6.01E-05 | CISD2 | CDGSH iron-sulfur domain-containing protein 2 OS=Homo sapiens GN=CISD2 PE=1 SV=1 - [CISD2_HUMAN]               |
| Q9UH99 | 1.1566  | 0.2099  | 6.21E-05 | SUN2  | SUN domain-containing protein 2 OS=Homo sapiens GN=SUN2 PE=1 SV=3 - [SUN2_HUMAN]                               |
| 015231 | 1.1716  | 0.2285  | 6.27E-05 | ZN185 | Zinc finger protein 185 OS=Homo sapiens GN=ZNF185 PE=1 SV=3 - [ZN185_HUMAN]                                    |
| Q13907 | 0.7412  | -0.4320 | 6.45E-05 | IDI1  | Isopentenyl-diphosphate Delta-isomerase 1 OS=Homo sapiens GN=IDI1 PE=1 SV=2 - [IDI1_HUMAN]                     |
| P04211 | 4.4398  | 2.1505  | 6.45E-05 | LV001 | Ig lambda chain V region 4A OS=Homo sapiens PE=4 SV=1 - [LV001_HUMAN]                                          |
| Q6DKJ4 | 0.8278  | -0.2727 | 6.50E-05 | NXN   | Nucleoredoxin OS=Homo sapiens GN=NXN PE=1 SV=2 - [NXN_HUMAN]                                                   |
| P61927 | 0.7420  | -0.4306 | 6.50E-05 | RL37  | 60S ribosomal protein L37 OS=Homo sapiens GN=RPL37 PE=1 SV=2 - [RL37_HUMAN]                                    |
| P01042 | 24.9053 | 4.6384  | 6.75E-05 | KNG1  | Kininogen-1 OS=Homo sapiens GN=KNG1 PE=1 SV=2 - [KNG1_HUMAN]                                                   |
| P01857 | 9.3843  | 3.2302  | 6.75E-05 | IGHG1 | Ig gamma-1 chain C region OS=Homo sapiens GN=IGHG1 PE=1 SV=1 - [IGHG1_HUMAN]                                   |
| P11310 | 1.1759  | 0.2338  | 6.89E-05 | ACADM | Medium-chain specific acyl-CoA dehydrogenase, mitochondrial OS=Homo sapiens GN=ACADM PE=1 SV=1 - [ACADM_HUMAN] |
| Q14914 | 1.2934  | 0.3712  | 7.05E-05 | PTGR1 | Prostaglandin reductase 1 OS=Homo sapiens GN=PTGR1 PE=1 SV=2 - [PTGR1_HUMAN]                                   |
| 043665 | 0.8465  | -0.2404 | 7.25E-05 | RGS10 | Regulator of G-protein signaling 10 OS=Homo sapiens GN=RGS10 PE=1 SV=2 - [RGS10_HUMAN]                         |
| Q7LBR1 | 1.2685  | 0.3432  | 7.25E-05 | CHM1B | Charged multivesicular body protein 1b OS=Homo sapiens GN=CHMP1B PE=1 SV=1 - [CHM1B_HUMAN]                     |
| Q12929 | 0.8447  | -0.2436 | 7.25E-05 | EPS8  | Epidermal growth factor receptor kinase substrate 8 OS=Homo sapiens GN=EPS8 PE=1 SV=1 - [EPS8_HUMAN]           |
| Q96HH9 | 1.2280  | 0.2963  | 7.25E-05 | GRAM3 | GRAM domain-containing protein 3 OS=Homo sapiens GN=GRAMD3 PE=1 SV=1 - [GRAM3_HUMAN]                           |
| Q9NPR9 | 1.3081  | 0.3874  | 7.38E-05 | GP108 | Protein GPR108 OS=Homo sapiens GN=GPR108 PE=2 SV=3 - [GP108_HUMAN]                                             |
| Q96PD5 | 11.5942 | 3.5353  | 7.39E-05 | PGRP2 | N-acetylmuramoyl-L-alanine amidase OS=Homo sapiens GN=PGLYRP2 PE=1 SV=1 - [PGRP2_HUMAN]                        |

|        |        |         |          |       |                                                                                                              |
|--------|--------|---------|----------|-------|--------------------------------------------------------------------------------------------------------------|
| O95864 | 0.7632 | -0.3900 | 7.62E-05 | FADS2 | Fatty acid desaturase 2 OS=Homo sapiens GN=FADS2 PE=1 SV=1 - [FADS2_HUMAN]                                   |
| Q9BPW8 | 1.1739 | 0.2313  | 7.65E-05 | NIPS1 | Protein NipSnap homolog 1 OS=Homo sapiens GN=NIPSNAP1 PE=1 SV=1 - [NIPS1_HUMAN]                              |
| Q5T4B2 | 1.3592 | 0.4427  | 7.79E-05 | GT253 | Probable inactive glycosyltransferase 25 family member 3 OS=Homo sapiens GN=CERCAM PE=2 SV=1 - [GT253_HUMAN] |
| P61812 | 0.8164 | -0.2927 | 7.83E-05 | TGFB2 | Transforming growth factor beta-2 OS=Homo sapiens GN=TGFB2 PE=1 SV=1 - [TGFB2_HUMAN]                         |
| O00468 | 1.1760 | 0.2339  | 7.93E-05 | AGRIN | Agrin OS=Homo sapiens GN=AGRIN PE=1 SV=5 - [AGRIN_HUMAN]                                                     |
| O60218 | 1.6985 | 0.7642  | 8.08E-05 | AK1BA | Aldo-keto reductase family 1 member B10 OS=Homo sapiens GN=AKR1B10 PE=1 SV=2 - [AK1BA_HUMAN]                 |
| P02511 | 1.2262 | 0.2942  | 8.34E-05 | CRYAB | Alpha-crystallin B chain OS=Homo sapiens GN=CRYAB PE=1 SV=2 - [CRYAB_HUMAN]                                  |
| Q5T9L3 | 0.7723 | -0.3728 | 8.87E-05 | WLS   | Protein wntless homolog OS=Homo sapiens GN=WLS PE=1 SV=2 - [WLS_HUMAN]                                       |
| O14530 | 0.8021 | -0.3182 | 8.90E-05 | TXND9 | Thioredoxin domain-containing protein 9 OS=Homo sapiens GN=TXNDC9 PE=1 SV=2 - [TXND9_HUMAN]                  |
| P14324 | 0.8453 | -0.2424 | 8.99E-05 | FPPS  | Farnesyl pyrophosphate synthase OS=Homo sapiens GN=FDPS PE=1 SV=4 - [FPPS_HUMAN]                             |
| P16112 | 0.7318 | -0.4504 | 9.10E-05 | PGCA  | Aggrecan core protein OS=Homo sapiens GN=ACAN PE=1 SV=2 - [PGCA_HUMAN]                                       |
| Q15113 | 1.4027 | 0.4882  | 9.31E-05 | PCOC1 | Procollagen C-endopeptidase enhancer 1 OS=Homo sapiens GN=PCOLCE PE=1 SV=2 - [PCOC1_HUMAN]                   |
| Q7Z3E5 | 1.1819 | 0.2411  | 9.36E-05 | ARMC9 | LisH domain-containing protein ARMC9 OS=Homo sapiens GN=ARMC9 PE=1 SV=2 - [ARMC9_HUMAN]                      |
| Q10713 | 1.1624 | 0.2170  | 9.36E-05 | MPPA  | Mitochondrial-processing peptidase subunit alpha OS=Homo sapiens GN=PMPCA PE=1 SV=2 - [MPPA_HUMAN]           |
| Q9NVT9 | 1.1797 | 0.2385  | 9.36E-05 | ARMC1 | Armadillo repeat-containing protein 1 OS=Homo sapiens GN=ARMC1 PE=1 SV=1 - [ARMC1_HUMAN]                     |
| P57077 | 0.7121 | -0.4899 | 9.54E-05 | M3KCL | MAP3K7 C-terminal-like protein OS=Homo sapiens GN=MAP3K7CL PE=1 SV=1 - [M3KCL_HUMAN]                         |
| Q53EP0 | 0.8397 | -0.2521 | 9.54E-05 | FND3B | Fibronectin type III domain-containing protein 3B OS=Homo sapiens GN=FNDC3B PE=1 SV=2 - [FND3B_HUMAN]        |
| Q6P1J9 | 0.8364 | -0.2577 | 9.56E-05 | CDC73 | Parafibromin OS=Homo sapiens GN=CDC73 PE=1 SV=1 - [CDC73_HUMAN]                                              |

|        |        |         |          |       |                                                                                                                              |
|--------|--------|---------|----------|-------|------------------------------------------------------------------------------------------------------------------------------|
| P01023 | 1.8991 | 0.9253  | 9.56E-05 | A2MG  | Alpha-2-macroglobulin OS=Homo sapiens GN=A2M PE=1 SV=3 - [A2MG_HUMAN]                                                        |
| P23743 | 1.1581 | 0.2118  | 9.58E-05 | DGKA  | Diacylglycerol kinase alpha OS=Homo sapiens GN=DGKA PE=1 SV=3 - [DGKA_HUMAN]                                                 |
| Q16222 | 0.8356 | -0.2592 | 9.89E-05 | UAP1  | UDP-N-acetylhexosamine pyrophosphorylase OS=Homo sapiens GN=UAP1 PE=1 SV=3 - [UAP1_HUMAN]                                    |
| Q14566 | 0.7630 | -0.3903 | 9.89E-05 | MCM6  | DNA replication licensing factor MCM6 OS=Homo sapiens GN=MCM6 PE=1 SV=1 - [MCM6_HUMAN]                                       |
| Q9UBG0 | 1.1539 | 0.2065  | 9.94E-05 | MRC2  | C-type mannose receptor 2 OS=Homo sapiens GN=MRC2 PE=1 SV=2 - [MRC2_HUMAN]                                                   |
| O15533 | 0.8355 | -0.2593 | 9.99E-05 | TPSN  | Tapasin OS=Homo sapiens GN=TAPBP PE=1 SV=1 - [TPSN_HUMAN]                                                                    |
| P62341 | 1.5811 | 0.6609  | 9.99E-05 | SELT  | Selenoprotein T OS=Homo sapiens GN=SELT PE=2 SV=2 - [SELT_HUMAN]                                                             |
| P50443 | 1.4180 | 0.5038  | 1.01E-04 | S26A2 | Sulfate transporter OS=Homo sapiens GN=SLC26A2 PE=1 SV=2 - [S26A2_HUMAN]                                                     |
| P07738 | 1.1976 | 0.2601  | 1.01E-04 | PMGE  | Bisphosphoglycerate mutase OS=Homo sapiens GN=BPGM PE=1 SV=2 - [PMGE_HUMAN]                                                  |
| Q6DKI1 | 0.8173 | -0.2911 | 1.02E-04 | RL7L  | 60S ribosomal protein L7-like 1 OS=Homo sapiens GN=RPL7L1 PE=1 SV=1 - [RL7L_HUMAN]                                           |
| Q15434 | 0.8098 | -0.3043 | 1.04E-04 | RBMS2 | RNA-binding motif, single-stranded-interacting protein 2 OS=Homo sapiens GN=RBMS2 PE=1 SV=1 - [RBMS2_HUMAN]                  |
| Q14123 | 0.8399 | -0.2517 | 1.06E-04 | PDE1C | Calcium/calmodulin-dependent 3',5'-cyclic nucleotide phosphodiesterase 1C OS=Homo sapiens GN=PDE1C PE=1 SV=1 - [PDE1C_HUMAN] |
| Q8NB16 | 0.8214 | -0.2839 | 1.07E-04 | MLKL  | Mixed lineage kinase domain-like protein OS=Homo sapiens GN=MLKL PE=1 SV=1 - [MLKL_HUMAN]                                    |
| P40261 | 1.2875 | 0.3646  | 1.08E-04 | NNMT  | Nicotinamide N-methyltransferase OS=Homo sapiens GN=NNMT PE=1 SV=1 - [NNMT_HUMAN]                                            |
| Q06830 | 1.1769 | 0.2349  | 1.15E-04 | PRDX1 | Peroxisiredoxin-1 OS=Homo sapiens GN=PRDX1 PE=1 SV=1 - [PRDX1_HUMAN]                                                         |
| O76021 | 0.8094 | -0.3050 | 1.17E-04 | RL1D1 | Ribosomal L1 domain-containing protein 1 OS=Homo sapiens GN=RSL1D1 PE=1 SV=3 - [RL1D1_HUMAN]                                 |
| P80303 | 1.1523 | 0.2046  | 1.19E-04 | NUCB2 | Nucleobindin-2 OS=Homo sapiens GN=NUCB2 PE=1 SV=2 - [NUCB2_HUMAN]                                                            |
| Q7Z3B1 | 1.1570 | 0.2104  | 1.19E-04 | NEGR1 | Neuronal growth regulator 1 OS=Homo sapiens GN=NEGR1 PE=1 SV=3 - [NEGR1_HUMAN]                                               |
| O75112 | 1.4843 | 0.5698  | 1.19E-04 | LDB3  | LIM domain-binding protein 3 OS=Homo sapiens GN=LDB3 PE=1 SV=2 - [LDB3_HUMAN]                                                |

|        |        |         |          |       |                                                                                                                             |
|--------|--------|---------|----------|-------|-----------------------------------------------------------------------------------------------------------------------------|
| Q9BZM5 | 1.2807 | 0.3569  | 1.19E-04 | N2DL2 | NKG2D ligand 2 OS=Homo sapiens<br>GN=ULBP2 PE=1 SV=1 -<br>[N2DL2_HUMAN]                                                     |
| Q92871 | 0.7521 | -0.4110 | 1.22E-04 | PMM1  | Phosphomannomutase 1 OS=Homo sapiens<br>GN=PMM1 PE=1 SV=2 -<br>[PMM1_HUMAN]                                                 |
| POCG04 | 3.0748 | 1.6205  | 1.23E-04 | LAC1  | Ig lambda-1 chain C regions<br>OS=Homo sapiens GN=IGLC1 PE=1<br>SV=1 - [LAC1_HUMAN]                                         |
| P17275 | 0.6258 | -0.6762 | 1.25E-04 | JUNB  | Transcription factor jun-B<br>OS=Homo sapiens GN=JUNB PE=1<br>SV=1 - [JUNB_HUMAN]                                           |
| Q5M775 | 1.2434 | 0.3143  | 1.29E-04 | CYTSB | Cytospin-B OS=Homo sapiens<br>GN=SPECC1 PE=1 SV=1 -<br>[CYTSB_HUMAN]                                                        |
| P16401 | 0.7235 | -0.4668 | 1.30E-04 | H15   | Histone H1.5 OS=Homo sapiens<br>GN=HIST1H1B PE=1 SV=3 -<br>[H15_HUMAN]                                                      |
| Q8NI36 | 0.7518 | -0.4116 | 1.31E-04 | WDR36 | WD repeat-containing protein 36<br>OS=Homo sapiens GN=WDR36<br>PE=1 SV=1 - [WDR36_HUMAN]                                    |
| Q3KQV9 | 1.1844 | 0.2442  | 1.35E-04 | UAP1L | UDP-N-acetylhexosamine<br>pyrophosphorylase-like protein 1<br>OS=Homo sapiens GN=UAP1L1<br>PE=1 SV=2 - [UAP1L_HUMAN]        |
| Q9NUJ1 | 1.2453 | 0.3165  | 1.35E-04 | ABHDA | Mycophenolic acid acyl-<br>glucuronide esterase,<br>mitochondrial OS=Homo sapiens<br>GN=ABHD10 PE=1 SV=1 -<br>[ABHDA_HUMAN] |
| O14981 | 0.8447 | -0.2435 | 1.37E-04 | BTAF1 | TATA-binding protein-associated<br>factor 172 OS=Homo sapiens<br>GN=BTAF1 PE=1 SV=2 -<br>[BTAF1_HUMAN]                      |
| Q68CQ7 | 1.1775 | 0.2357  | 1.43E-04 | GL8D1 | Glycosyltransferase 8 domain-<br>containing protein 1 OS=Homo<br>sapiens GN=GLT8D1 PE=1 SV=2 -<br>[GL8D1_HUMAN]             |
| Q14534 | 0.7931 | -0.3345 | 1.45E-04 | ERG1  | Squalene monooxygenase<br>OS=Homo sapiens GN=SQLE PE=1<br>SV=3 - [ERG1_HUMAN]                                               |
| P35520 | 0.7860 | -0.3473 | 1.45E-04 | CBS   | Cystathionine beta-synthase<br>OS=Homo sapiens GN=CBS PE=1<br>SV=2 - [CBS_HUMAN]                                            |
| Q92503 | 0.6513 | -0.6185 | 1.49E-04 | S14L1 | SEC14-like protein 1 OS=Homo<br>sapiens GN=SEC14L1 PE=1 SV=2 -<br>[S14L1_HUMAN]                                             |
| P04179 | 1.1685 | 0.2247  | 1.53E-04 | SODM  | Superoxide dismutase [Mn],<br>mitochondrial OS=Homo sapiens<br>GN=SOD2 PE=1 SV=2 -<br>[SODM_HUMAN]                          |
| Q16832 | 1.2573 | 0.3303  | 1.53E-04 | DDR2  | Discoidin domain-containing<br>receptor 2 OS=Homo sapiens<br>GN=DDR2 PE=1 SV=2 -<br>[DDR2_HUMAN]                            |
| Q9BQE5 | 0.8440 | -0.2447 | 1.55E-04 | APOL2 | Apolipoprotein L2 OS=Homo<br>sapiens GN=APOL2 PE=1 SV=1 -<br>[APOL2_HUMAN]                                                  |
| Q9H773 | 0.8325 | -0.2645 | 1.56E-04 | DCTP1 | dCTP pyrophosphatase 1 OS=Homo<br>sapiens GN=DCTPP1 PE=1 SV=1 -<br>[DCTP1_HUMAN]                                            |

|        |        |         |          |        |                                                                                                                                                |
|--------|--------|---------|----------|--------|------------------------------------------------------------------------------------------------------------------------------------------------|
| Q9NZJ7 | 1.2076 | 0.2721  | 1.57E-04 | MTCH1  | Mitochondrial carrier homolog 1<br>OS=Homo sapiens GN=MTCH1<br>PE=1 SV=1 - [MTCH1_HUMAN]                                                       |
| Q15269 | 0.8188 | -0.2884 | 1.60E-04 | PWP2   | Periodic tryptophan protein 2<br>homolog OS=Homo sapiens<br>GN=PWP2 PE=1 SV=2 -<br>[PWP2_HUMAN]                                                |
| Q8IX30 | 0.7786 | -0.3611 | 1.62E-04 | SCUB3  | Signal peptide, CUB and EGF-like<br>domain-containing protein 3<br>OS=Homo sapiens GN=SCUBE3<br>PE=1 SV=1 - [SCUB3_HUMAN]                      |
| Q96RU3 | 0.8021 | -0.3181 | 1.65E-04 | FNBP1  | Formin-binding protein 1<br>OS=Homo sapiens GN=FNBP1<br>PE=1 SV=2 - [FNBP1_HUMAN]                                                              |
| Q6NUM9 | 1.2168 | 0.2831  | 1.72E-04 | RETST  | All-trans-retinol 13,14-reductase<br>OS=Homo sapiens GN=RETSAT<br>PE=1 SV=2 - [RETST_HUMAN]                                                    |
| O95084 | 0.8278 | -0.2726 | 1.73E-04 | PRSS23 | Serine protease 23 OS=Homo<br>sapiens GN=PRSS23 PE=1 SV=1 -<br>[PRSS23_HUMAN]                                                                  |
| Q9Y2R0 | 1.1885 | 0.2491  | 1.73E-04 | COA3   | Cytochrome c oxidase assembly<br>protein 3 homolog, mitochondrial<br>OS=Homo sapiens GN=COA3 PE=1<br>SV=1 - [COA3_HUMAN]                       |
| Q14978 | 0.7979 | -0.3258 | 1.74E-04 | NOLC1  | Nucleolar and coiled-body<br>phosphoprotein 1 OS=Homo<br>sapiens GN=NOLC1 PE=1 SV=2 -<br>[NOLC1_HUMAN]                                         |
| Q5BJF2 | 0.6181 | -0.6941 | 1.75E-04 | TMM97  | Transmembrane protein 97<br>OS=Homo sapiens GN=TMEM97<br>PE=1 SV=1 - [TMM97_HUMAN]                                                             |
| Q9UBM7 | 0.8488 | -0.2365 | 1.81E-04 | DHCR7  | 7-dehydrocholesterol reductase<br>OS=Homo sapiens GN=DHCR7<br>PE=1 SV=1 - [DHCR7_HUMAN]                                                        |
| Q9HD26 | 1.1663 | 0.2219  | 1.81E-04 | GOPC   | Golgi-associated PDZ and coiled-<br>coil motif-containing protein<br>OS=Homo sapiens GN=GOPC PE=1<br>SV=1 - [GOPC_HUMAN]                       |
| Q13938 | 1.3429 | 0.4254  | 1.81E-04 | CAYP1  | Calcyphosin OS=Homo sapiens<br>GN=CAPS PE=1 SV=1 -<br>[CAYP1_HUMAN]                                                                            |
| P08519 | 2.9234 | 1.5476  | 1.84E-04 | APOA   | Apolipoprotein(a) OS=Homo<br>sapiens GN=LPA PE=1 SV=1 -<br>[APOA_HUMAN]                                                                        |
| Q9Y6H1 | 1.1507 | 0.2025  | 1.86E-04 | CHCH2  | Coiled-coil-helix-coiled-coil-helix<br>domain-containing protein 2,<br>mitochondrial OS=Homo sapiens<br>GN=CHCHD2 PE=1 SV=1 -<br>[CHCH2_HUMAN] |
| P04181 | 1.1608 | 0.2152  | 1.90E-04 | OAT    | Ornithine aminotransferase,<br>mitochondrial OS=Homo sapiens<br>GN=OAT PE=1 SV=1 -<br>[OAT_HUMAN]                                              |
| Q96QV1 | 0.7726 | -0.3722 | 1.94E-04 | HHIP   | Hedgehog-interacting protein<br>OS=Homo sapiens GN=HHIP PE=1<br>SV=3 - [HHIP_HUMAN]                                                            |
| P08493 | 0.6307 | -0.6649 | 1.96E-04 | MGP    | Matrix Gla protein OS=Homo<br>sapiens GN=MGP PE=1 SV=2 -<br>[MGP_HUMAN]                                                                        |
| P35240 | 0.8382 | -0.2546 | 1.97E-04 | MERL   | Merlin OS=Homo sapiens GN=NF2<br>PE=1 SV=1 - [MERL_HUMAN]                                                                                      |



|        |        |         |          |       |                                                                                                                                  |
|--------|--------|---------|----------|-------|----------------------------------------------------------------------------------------------------------------------------------|
| P62910 | 0.7873 | -0.3450 | 1.98E-04 | RL32  | 60S ribosomal protein L32<br>OS=Homo sapiens GN=RPL32 PE=1<br>SV=2 - [RL32_HUMAN]                                                |
| P35568 | 1.5925 | 0.6713  | 2.03E-04 | IRS1  | Insulin receptor substrate 1<br>OS=Homo sapiens GN=IRS1 PE=1<br>SV=1 - [IRS1_HUMAN]                                              |
| O75153 | 0.8300 | -0.2689 | 2.03E-04 | CLU   | Clustered mitochondria protein<br>homolog OS=Homo sapiens<br>GN=CLUH PE=1 SV=2 -<br>[CLU_HUMAN]                                  |
| P02765 | 4.1146 | 2.0407  | 2.05E-04 | FETUA | Alpha-2-HS-glycoprotein OS=Homo<br>sapiens GN=AHSG PE=1 SV=1 -<br>[FETUA_HUMAN]                                                  |
| P23142 | 1.3153 | 0.3954  | 2.09E-04 | FBLN1 | Fibulin-1 OS=Homo sapiens<br>GN=FBLN1 PE=1 SV=4 -<br>[FBLN1_HUMAN]                                                               |
| P01623 | 9.8898 | 3.3059  | 2.12E-04 | KV305 | Ig kappa chain V-III region WOL<br>OS=Homo sapiens PE=1 SV=1 -<br>[KV305_HUMAN]                                                  |
| Q15262 | 1.2873 | 0.3644  | 2.12E-04 | PTPRK | Receptor-type tyrosine-protein<br>phosphatase kappa OS=Homo<br>sapiens GN=PTPRK PE=1 SV=2 -<br>[PTPRK_HUMAN]                     |
| P07942 | 0.8486 | -0.2368 | 2.12E-04 | LAMB1 | Laminin subunit beta-1 OS=Homo<br>sapiens GN=LAMB1 PE=1 SV=2 -<br>[LAMB1_HUMAN]                                                  |
| P00568 | 1.1690 | 0.2253  | 2.13E-04 | KAD1  | Adenylate kinase isoenzyme 1<br>OS=Homo sapiens GN=AK1 PE=1<br>SV=3 - [KAD1_HUMAN]                                               |
| P26022 | 0.7176 | -0.4787 | 2.13E-04 | PTX3  | Pentraxin-related protein PTX3<br>OS=Homo sapiens GN=PTX3 PE=1<br>SV=3 - [PTX3_HUMAN]                                            |
| Q16540 | 1.2793 | 0.3554  | 2.13E-04 | RM23  | 39S ribosomal protein L23,<br>mitochondrial OS=Homo sapiens<br>GN=MRPL23 PE=1 SV=1 -<br>[RM23_HUMAN]                             |
| O95801 | 0.7812 | -0.3563 | 2.17E-04 | TTC4  | Tetratricopeptide repeat protein 4<br>OS=Homo sapiens GN=TTC4 PE=1<br>SV=3 - [TTC4_HUMAN]                                        |
| Q15147 | 1.4646 | 0.5505  | 2.22E-04 | PLCB4 | 1-phosphatidylinositol 4,5-<br>bisphosphate phosphodiesterase<br>beta-4 OS=Homo sapiens<br>GN=PLCB4 PE=1 SV=3 -<br>[PLCB4_HUMAN] |
| O00767 | 0.7643 | -0.3878 | 2.26E-04 | ACOD  | Acyl-CoA desaturase OS=Homo<br>sapiens GN=SCD PE=1 SV=2 -<br>[ACOD_HUMAN]                                                        |
| Q8IVM0 | 0.8187 | -0.2887 | 2.26E-04 | CCD50 | Coiled-coil domain-containing<br>protein 50 OS=Homo sapiens<br>GN=CCDC50 PE=1 SV=1 -<br>[CCD50_HUMAN]                            |
| Q16527 | 1.1521 | 0.2043  | 2.26E-04 | CSRP2 | Cysteine and glycine-rich protein 2<br>OS=Homo sapiens GN=CSRP2 PE=1<br>SV=3 - [CSRP2_HUMAN]                                     |
| Q9BUE6 | 1.3325 | 0.4142  | 2.32E-04 | ISCA1 | Iron-sulfur cluster assembly 1<br>homolog, mitochondrial OS=Homo<br>sapiens GN=ISCA1 PE=2 SV=1 -<br>[ISCA1_HUMAN]                |
| Q96NE9 | 0.8059 | -0.3114 | 2.36E-04 | FRMD6 | FERM domain-containing protein 6<br>OS=Homo sapiens GN=FRMD6<br>PE=1 SV=1 - [FRMD6_HUMAN]                                        |
| P50148 | 1.1638 | 0.2188  | 2.49E-04 | GNAQ  | Guanine nucleotide-binding<br>protein G(q) subunit alpha                                                                         |

|        |        |         |          |       |                                                                                                                             |
|--------|--------|---------|----------|-------|-----------------------------------------------------------------------------------------------------------------------------|
|        |        |         |          |       | OS=Homo sapiens GN=GNAQ PE=1 SV=4 - [GNAQ_HUMAN]                                                                            |
| P11233 | 1.1718 | 0.2288  | 2.59E-04 | RALA  | Ras-related protein Ral-A OS=Homo sapiens GN=RALA PE=1 SV=1 - [RALA_HUMAN]                                                  |
| P52943 | 1.1654 | 0.2209  | 2.59E-04 | CRIP2 | Cysteine-rich protein 2 OS=Homo sapiens GN=CRIP2 PE=1 SV=1 - [CRIP2_HUMAN]                                                  |
| Q8NE86 | 1.1835 | 0.2431  | 2.64E-04 | MCU   | Calcium uniporter protein, mitochondrial OS=Homo sapiens GN=MCU PE=1 SV=1 - [MCU_HUMAN]                                     |
| P54652 | 0.7676 | -0.3816 | 2.76E-04 | HSP72 | Heat shock-related 70 kDa protein 2 OS=Homo sapiens GN=HSPA2 PE=1 SV=1 - [HSP72_HUMAN]                                      |
| P53602 | 0.8166 | -0.2923 | 2.78E-04 | MVD1  | Diphosphomevalonate decarboxylase OS=Homo sapiens GN=MVD PE=1 SV=1 - [MVD1_HUMAN]                                           |
| Q9BZE4 | 0.8265 | -0.2750 | 2.84E-04 | NOG1  | Nucleolar GTP-binding protein 1 OS=Homo sapiens GN=GTPBP4 PE=1 SV=3 - [NOG1_HUMAN]                                          |
| Q08209 | 1.1750 | 0.2326  | 2.95E-04 | PP2BA | Serine/threonine-protein phosphatase 2B catalytic subunit alpha isoform OS=Homo sapiens GN=PPP3CA PE=1 SV=1 - [PP2BA_HUMAN] |
| Q969X6 | 0.8135 | -0.2978 | 2.95E-04 | CIR1A | Cirhin OS=Homo sapiens GN=CIRH1A PE=1 SV=1 - [CIR1A_HUMAN]                                                                  |
| Q16762 | 1.2377 | 0.3076  | 3.00E-04 | THTR  | Thiosulfate sulfurtransferase OS=Homo sapiens GN=TST PE=1 SV=4 - [THTR_HUMAN]                                               |
| P04062 | 1.2005 | 0.2636  | 3.02E-04 | GLCM  | Glucosylceramidase OS=Homo sapiens GN=GBA PE=1 SV=3 - [GLCM_HUMAN]                                                          |
| O15075 | 0.7831 | -0.3527 | 3.03E-04 | DCLK1 | Serine/threonine-protein kinase DCLK1 OS=Homo sapiens GN=DCLK1 PE=1 SV=2 - [DCLK1_HUMAN]                                    |
| Q9BTD8 | 1.4728 | 0.5586  | 3.07E-04 | RBM42 | RNA-binding protein 42 OS=Homo sapiens GN=RBM42 PE=1 SV=1 - [RBM42_HUMAN]                                                   |
| Q9HB63 | 1.3667 | 0.4507  | 3.13E-04 | NET4  | Netrin-4 OS=Homo sapiens GN=NTN4 PE=2 SV=2 - [NET4_HUMAN]                                                                   |
| O00625 | 1.2458 | 0.3171  | 3.13E-04 | PIR   | Pirin OS=Homo sapiens GN=PIR PE=1 SV=1 - [PIR_HUMAN]                                                                        |
| Q00537 | 0.8103 | -0.3035 | 3.18E-04 | CDK17 | Cyclin-dependent kinase 17 OS=Homo sapiens GN=CDK17 PE=1 SV=2 - [CDK17_HUMAN]                                               |
| O14879 | 0.7390 | -0.4364 | 3.25E-04 | IFIT3 | Interferon-induced protein with tetratricopeptide repeats 3 OS=Homo sapiens GN=IFIT3 PE=1 SV=1 - [IFIT3_HUMAN]              |
| Q8IXK0 | 0.7541 | -0.4072 | 3.27E-04 | PHC2  | Polyhomeotic-like protein 2 OS=Homo sapiens GN=PHC2 PE=1 SV=1 - [PHC2_HUMAN]                                                |
| Q71RC2 | 0.8180 | -0.2898 | 3.27E-04 | LARP4 | La-related protein 4 OS=Homo sapiens GN=LARP4 PE=1 SV=3 - [LARP4_HUMAN]                                                     |

|        |        |         |          |       |                                                                                                      |
|--------|--------|---------|----------|-------|------------------------------------------------------------------------------------------------------|
| O14494 | 1.4608 | 0.5467  | 3.28E-04 | LPP1  | Lipid phosphate phosphohydrolase 1 OS=Homo sapiens GN=PPAP2A PE=1 SV=1 - [LPP1_HUMAN]                |
| Q07352 | 1.3993 | 0.4847  | 3.29E-04 | TISB  | Zinc finger protein 36, C3H1 type-like 1 OS=Homo sapiens GN=ZFP36L1 PE=1 SV=1 - [TISB_HUMAN]         |
| Q15397 | 0.8256 | -0.2764 | 3.35E-04 | K0020 | Pumilio domain-containing protein KIAA0020 OS=Homo sapiens GN=KIAA0020 PE=1 SV=3 - [K0020_HUMAN]     |
| P49407 | 1.1583 | 0.2120  | 3.37E-04 | ARRB1 | Beta-arrestin-1 OS=Homo sapiens GN=ARRB1 PE=1 SV=2 - [ARRB1_HUMAN]                                   |
| Q8TDB4 | 0.7054 | -0.5035 | 3.39E-04 | HUMMR | Protein MGARP OS=Homo sapiens GN=MGARP PE=1 SV=1 - [HUMMR_HUMAN]                                     |
| P48506 | 1.2280 | 0.2963  | 3.49E-04 | GSH1  | Glutamate--cysteine ligase catalytic subunit OS=Homo sapiens GN=GCLC PE=1 SV=2 - [GSH1_HUMAN]        |
| Q04941 | 1.1745 | 0.2321  | 3.49E-04 | PLP2  | Proteolipid protein 2 OS=Homo sapiens GN=PLP2 PE=1 SV=1 - [PLP2_HUMAN]                               |
| O75326 | 1.2157 | 0.2818  | 3.60E-04 | SEM7A | Semaphorin-7A OS=Homo sapiens GN=SEMA7A PE=1 SV=1 - [SEM7A_HUMAN]                                    |
| P49736 | 0.6935 | -0.5280 | 3.71E-04 | MCM2  | DNA replication licensing factor MCM2 OS=Homo sapiens GN=MCM2 PE=1 SV=4 - [MCM2_HUMAN]               |
| Q9GZM8 | 0.7797 | -0.3590 | 3.74E-04 | NDEL1 | Nuclear distribution protein nude-like 1 OS=Homo sapiens GN=NDEL1 PE=1 SV=1 - [NDEL1_HUMAN]          |
| P33993 | 0.7516 | -0.4120 | 3.74E-04 | MCM7  | DNA replication licensing factor MCM7 OS=Homo sapiens GN=MCM7 PE=1 SV=4 - [MCM7_HUMAN]               |
| Q9Y697 | 1.1637 | 0.2187  | 3.74E-04 | NFS1  | Cysteine desulfurase, mitochondrial OS=Homo sapiens GN=NFS1 PE=1 SV=3 - [NFS1_HUMAN]                 |
| A6NDU8 | 0.7188 | -0.4764 | 4.00E-04 | CE051 | UPF0600 protein C5orf51 OS=Homo sapiens GN=C5orf51 PE=1 SV=1 - [CE051_HUMAN]                         |
| Q13228 | 1.1816 | 0.2408  | 4.07E-04 | SBP1  | Selenium-binding protein 1 OS=Homo sapiens GN=SELENBP1 PE=1 SV=2 - [SBP1_HUMAN]                      |
| Q96QD8 | 1.3391 | 0.4213  | 4.34E-04 | S38A2 | Sodium-coupled neutral amino acid transporter 2 OS=Homo sapiens GN=SLC38A2 PE=1 SV=2 - [S38A2_HUMAN] |
| Q6P158 | 0.8325 | -0.2645 | 4.52E-04 | DHX57 | Putative ATP-dependent RNA helicase DHX57 OS=Homo sapiens GN=DHX57 PE=1 SV=2 - [DHX57_HUMAN]         |
| P30825 | 0.7722 | -0.3730 | 4.55E-04 | CTR1  | High affinity cationic amino acid transporter 1 OS=Homo sapiens GN=SLC7A1 PE=1 SV=1 - [CTR1_HUMAN]   |

|        |        |         |          |       |                                                                                                                  |
|--------|--------|---------|----------|-------|------------------------------------------------------------------------------------------------------------------|
| Q9BZX2 | 0.7846 | -0.3499 | 4.65E-04 | UCK2  | Uridine-cytidine kinase 2<br>OS=Homo sapiens GN=UCK2 PE=1 SV=1 - [UCK2_HUMAN]                                    |
| Q06203 | 0.8055 | -0.3121 | 4.67E-04 | PUR1  | Amidophosphoribosyltransferase<br>OS=Homo sapiens GN=PPAT PE=1 SV=1 - [PUR1_HUMAN]                               |
| O43166 | 1.2104 | 0.2755  | 4.69E-04 | SI1L1 | Signal-induced proliferation-associated 1-like protein 1<br>OS=Homo sapiens GN=SIPA1L1 PE=1 SV=4 - [SI1L1_HUMAN] |
| Q9UIF9 | 1.1786 | 0.2370  | 4.69E-04 | BAZ2A | Bromodomain adjacent to zinc finger domain protein 2A<br>OS=Homo sapiens GN=BAZ2A PE=1 SV=4 - [BAZ2A_HUMAN]      |
| Q9Y6R0 | 1.1741 | 0.2316  | 4.79E-04 | NUMBL | Numb-like protein OS=Homo sapiens GN=NUMBL PE=1 SV=1 - [NUMBL_HUMAN]                                             |
| Q7Z7M9 | 0.7461 | -0.4226 | 4.88E-04 | GALT5 | Polypeptide N-acetylgalactosaminyltransferase 5<br>OS=Homo sapiens GN=GALNT5 PE=1 SV=1 - [GALT5_HUMAN]           |
| P24385 | 0.6148 | -0.7018 | 4.88E-04 | CCND1 | G1/S-specific cyclin-D1 OS=Homo sapiens GN=CCND1 PE=1 SV=1 - [CCND1_HUMAN]                                       |
| O95865 | 1.1578 | 0.2114  | 4.93E-04 | DDAH2 | N(G),N(G)-dimethylarginine dimethylaminohydrolase 2<br>OS=Homo sapiens GN=DDAH2 PE=1 SV=1 - [DDAH2_HUMAN]        |
| P02792 | 0.5992 | -0.7388 | 4.94E-04 | FRIL  | Ferritin light chain OS=Homo sapiens GN=FTL PE=1 SV=2 - [FRIL_HUMAN]                                             |
| Q13823 | 0.7364 | -0.4414 | 4.99E-04 | NOG2  | Nucleolar GTP-binding protein 2<br>OS=Homo sapiens GN=GNL2 PE=1 SV=1 - [NOG2_HUMAN]                              |
| Q08397 | 0.7895 | -0.3410 | 5.06E-04 | LOXL1 | Lysyl oxidase homolog 1 OS=Homo sapiens GN=LOXL1 PE=1 SV=2 - [LOXL1_HUMAN]                                       |
| P42771 | 0.8083 | -0.3070 | 5.28E-04 | CD2A1 | Cyclin-dependent kinase inhibitor 2A, isoforms 1/2/3 OS=Homo sapiens GN=CDKN2A PE=1 SV=2 - [CD2A1_HUMAN]         |
| O15066 | 0.8482 | -0.2376 | 5.29E-04 | KIF3B | Kinesin-like protein KIF3B OS=Homo sapiens GN=KIF3B PE=1 SV=1 - [KIF3B_HUMAN]                                    |
| Q6ZNB6 | 1.1963 | 0.2585  | 5.33E-04 | NFXL1 | NF-X1-type zinc finger protein NFXL1 OS=Homo sapiens GN=NFXL1 PE=1 SV=2 - [NFXL1_HUMAN]                          |
| Q9HB40 | 1.2052 | 0.2692  | 5.38E-04 | RISC  | Retinoid-inducible serine carboxypeptidase OS=Homo sapiens GN=SCPEP1 PE=1 SV=1 - [RISC_HUMAN]                    |
| P15924 | 0.8182 | -0.2895 | 5.38E-04 | DESP  | Desmoplakin OS=Homo sapiens GN=DSP PE=1 SV=3 - [DESP_HUMAN]                                                      |
| P02794 | 0.7023 | -0.5097 | 5.41E-04 | FRIH  | Ferritin heavy chain OS=Homo sapiens GN=FTH1 PE=1 SV=2 - [FRIH_HUMAN]                                            |
| O75683 | 0.8285 | -0.2715 | 5.53E-04 | SURF6 | Surfeit locus protein 6 OS=Homo sapiens GN=SURF6 PE=1 SV=3 - [SURF6_HUMAN]                                       |
| Q96BA8 | 0.7162 | -0.4816 | 5.55E-04 | CR3L1 | Cyclic AMP-responsive element-binding protein 3-like protein 1                                                   |

|        |        |         |          |       |                                                                                                                       |
|--------|--------|---------|----------|-------|-----------------------------------------------------------------------------------------------------------------------|
|        |        |         |          |       | OS=Homo sapiens GN=CREB3L1<br>PE=1 SV=1 - [CR3L1_HUMAN]                                                               |
| Q9BQ61 | 0.8447 | -0.2435 | 5.61E-04 | CS043 | Uncharacterized protein C19orf43<br>OS=Homo sapiens GN=C19orf43<br>PE=1 SV=1 - [CS043_HUMAN]                          |
| O95183 | 0.8383 | -0.2544 | 5.63E-04 | VAMP5 | Vesicle-associated membrane<br>protein 5 OS=Homo sapiens<br>GN=VAMP5 PE=1 SV=1 -<br>[VAMP5_HUMAN]                     |
| P17931 | 0.8426 | -0.2471 | 5.64E-04 | LEG3  | Galectin-3 OS=Homo sapiens<br>GN=LGALS3 PE=1 SV=5 -<br>[LEG3_HUMAN]                                                   |
| Q63HR2 | 1.1864 | 0.2466  | 5.70E-04 | TENC1 | Tensin-like C1 domain-containing<br>phosphatase OS=Homo sapiens<br>GN=TENC1 PE=1 SV=2 -<br>[TENC1_HUMAN]              |
| Q6PK04 | 0.8069 | -0.3095 | 5.86E-04 | CC137 | Coiled-coil domain-containing<br>protein 137 OS=Homo sapiens<br>GN=CCDC137 PE=1 SV=1 -<br>[CC137_HUMAN]               |
| Q08431 | 1.1932 | 0.2549  | 5.87E-04 | MFGM  | Lactadherin OS=Homo sapiens<br>GN=MFG8 PE=1 SV=2 -<br>[MFGM_HUMAN]                                                    |
| Q9GZR7 | 0.7840 | -0.3510 | 5.88E-04 | DDX24 | ATP-dependent RNA helicase<br>DDX24 OS=Homo sapiens<br>GN=DDX24 PE=1 SV=1 -<br>[DDX24_HUMAN]                          |
| Q13433 | 1.2156 | 0.2817  | 5.90E-04 | S39A6 | Zinc transporter ZIP6 OS=Homo<br>sapiens GN=SLC39A6 PE=1 SV=3 -<br>[S39A6_HUMAN]                                      |
| Q16363 | 1.8468 | 0.8850  | 5.90E-04 | LAMA4 | Laminin subunit alpha-4 OS=Homo<br>sapiens GN=LAMA4 PE=1 SV=4 -<br>[LAMA4_HUMAN]                                      |
| O75208 | 1.1875 | 0.2479  | 5.94E-04 | COQ9  | Ubiquinone biosynthesis protein<br>COQ9, mitochondrial OS=Homo<br>sapiens GN=COQ9 PE=1 SV=1 -<br>[COQ9_HUMAN]         |
| Q4J6C6 | 0.8384 | -0.2543 | 6.28E-04 | PPCEL | Prolyl endopeptidase-like<br>OS=Homo sapiens GN=PREPL PE=1<br>SV=1 - [PPCEL_HUMAN]                                    |
| O14949 | 1.1591 | 0.2130  | 6.38E-04 | QCR8  | Cytochrome b-c1 complex subunit<br>8 OS=Homo sapiens GN=UQCRQ<br>PE=1 SV=4 - [QCR8_HUMAN]                             |
| Q9H4G0 | 1.2091 | 0.2740  | 6.55E-04 | E41L1 | Band 4.1-like protein 1 OS=Homo<br>sapiens GN=EPB41L1 PE=1 SV=2 -<br>[E41L1_HUMAN]                                    |
| O14556 | 0.8454 | -0.2423 | 6.56E-04 | G3PT  | Glyceraldehyde-3-phosphate<br>dehydrogenase, testis-specific<br>OS=Homo sapiens GN=GAPDHS<br>PE=1 SV=2 - [G3PT_HUMAN] |
| Q15061 | 0.8272 | -0.2736 | 6.62E-04 | WDR43 | WD repeat-containing protein 43<br>OS=Homo sapiens GN=WDR43<br>PE=1 SV=3 - [WDR43_HUMAN]                              |
| P02748 | 2.5803 | 1.3675  | 6.62E-04 | CO9   | Complement component C9<br>OS=Homo sapiens GN=C9 PE=1<br>SV=2 - [CO9_HUMAN]                                           |
| Q92597 | 1.1490 | 0.2004  | 6.93E-04 | NDRG1 | Protein NDRG1 OS=Homo sapiens<br>GN=NDRG1 PE=1 SV=1 -<br>[NDRG1_HUMAN]                                                |
| Q6ICB0 | 0.7892 | -0.3415 | 7.13E-04 | DESI1 | Desumoylating isopeptidase 1<br>OS=Homo sapiens GN=DESI1 PE=1<br>SV=1 - [DESI1_HUMAN]                                 |

|        |        |         |          |       |                                                                                                                      |
|--------|--------|---------|----------|-------|----------------------------------------------------------------------------------------------------------------------|
| P50213 | 1.1891 | 0.2499  | 7.20E-04 | IDH3A | Isocitrate dehydrogenase [NAD] subunit alpha, mitochondrial OS=Homo sapiens GN=IDH3A PE=1 SV=1 - [IDH3A_HUMAN]       |
| P11166 | 0.8262 | -0.2754 | 7.27E-04 | GTR1  | Solute carrier family 2, facilitated glucose transporter member 1 OS=Homo sapiens GN=SLC2A1 PE=1 SV=2 - [GTR1_HUMAN] |
| P34096 | 1.2400 | 0.3104  | 7.37E-04 | RNAS4 | Ribonuclease 4 OS=Homo sapiens GN=RNAS4 PE=1 SV=3 - [RNAS4_HUMAN]                                                    |
| Q16822 | 1.1640 | 0.2191  | 7.41E-04 | PCKGM | Phosphoenolpyruvate carboxykinase [GTP], mitochondrial OS=Homo sapiens GN=PCK2 PE=1 SV=3 - [PCKGM_HUMAN]             |
| Q9P2E7 | 0.8017 | -0.3188 | 7.41E-04 | PCD10 | Protocadherin-10 OS=Homo sapiens GN=PCDH10 PE=2 SV=2 - [PCD10_HUMAN]                                                 |
| Q9ULF5 | 1.2147 | 0.2806  | 7.45E-04 | S39AA | Zinc transporter ZIP10 OS=Homo sapiens GN=SLC39A10 PE=1 SV=2 - [S39AA_HUMAN]                                         |
| Q9Y580 | 0.8177 | -0.2903 | 7.59E-04 | RBM7  | RNA-binding protein 7 OS=Homo sapiens GN=RBM7 PE=1 SV=1 - [RBM7_HUMAN]                                               |
| E9PRG8 | 0.8471 | -0.2393 | 7.65E-04 | CK098 | Uncharacterized protein C11orf98 OS=Homo sapiens GN=C11orf98 PE=4 SV=1 - [CK098_HUMAN]                               |
| P62891 | 0.8239 | -0.2794 | 7.66E-04 | RL39  | 60S ribosomal protein L39 OS=Homo sapiens GN=RPL39 PE=1 SV=2 - [RL39_HUMAN]                                          |
| Q9Y3D2 | 1.1712 | 0.2280  | 7.75E-04 | MSRB2 | Methionine-R-sulfoxide reductase B2, mitochondrial OS=Homo sapiens GN=MSRB2 PE=2 SV=2 - [MSRB2_HUMAN]                |
| P51884 | 1.1831 | 0.2426  | 7.86E-04 | LUM   | Lumican OS=Homo sapiens GN=LUM PE=1 SV=2 - [LUM_HUMAN]                                                               |
| Q14137 | 0.8393 | -0.2527 | 7.94E-04 | BOP1  | Ribosome biogenesis protein BOP1 OS=Homo sapiens GN=BOP1 PE=1 SV=2 - [BOP1_HUMAN]                                    |
| P10599 | 1.2365 | 0.3063  | 8.23E-04 | THIO  | Thioredoxin OS=Homo sapiens GN=TXN PE=1 SV=3 - [THIO_HUMAN]                                                          |
| Q5W0Z9 | 1.1881 | 0.2486  | 8.27E-04 | ZDH20 | Probable palmitoyltransferase ZDHHC20 OS=Homo sapiens GN=ZDHHC20 PE=1 SV=1 - [ZDH20_HUMAN]                           |
| Q9NY61 | 0.7440 | -0.4266 | 8.27E-04 | AATF  | Protein AATF OS=Homo sapiens GN=AATF PE=1 SV=1 - [AATF_HUMAN]                                                        |
| O43426 | 1.3383 | 0.4204  | 8.37E-04 | SYNJ1 | Synaptojanin-1 OS=Homo sapiens GN=SYNJ1 PE=1 SV=2 - [SYNJ1_HUMAN]                                                    |
| Q15067 | 1.2098 | 0.2747  | 8.80E-04 | ACOX1 | Peroxisomal acyl-coenzyme A oxidase 1 OS=Homo sapiens GN=ACOX1 PE=1 SV=3 - [ACOX1_HUMAN]                             |
| Q96JA1 | 0.5337 | -0.9058 | 8.82E-04 | LRIG1 | Leucine-rich repeats and immunoglobulin-like domains protein 1 OS=Homo sapiens GN=LRIG1 PE=1 SV=2 - [LRIG1_HUMAN]    |

|        |        |         |          |       |                                                                                                                                |
|--------|--------|---------|----------|-------|--------------------------------------------------------------------------------------------------------------------------------|
| Q53F39 | 1.2898 | 0.3671  | 8.95E-04 | MPPE1 | Metallophosphoesterase 1<br>OS=Homo sapiens GN=MPPE1<br>PE=1 SV=2 - [MPPE1_HUMAN]                                              |
| Q96BR5 | 1.2871 | 0.3641  | 9.04E-04 | SELR1 | Sel1 repeat-containing protein 1<br>OS=Homo sapiens GN=SELRC1<br>PE=1 SV=2 - [SELR1_HUMAN]                                     |
| P84022 | 0.7218 | -0.4703 | 9.14E-04 | SMAD3 | Mothers against decapentaplegic<br>homolog 3 OS=Homo sapiens<br>GN=SMAD3 PE=1 SV=1 -<br>[SMAD3_HUMAN]                          |
| Q53HC0 | 0.8293 | -0.2700 | 9.16E-04 | CCD92 | Coiled-coil domain-containing<br>protein 92 OS=Homo sapiens<br>GN=CCDC92 PE=1 SV=2 -<br>[CCD92_HUMAN]                          |
| Q9H4G4 | 1.2278 | 0.2961  | 9.18E-04 | GAPR1 | Golgi-associated plant<br>pathogenesis-related protein 1<br>OS=Homo sapiens GN=GLIPR2<br>PE=1 SV=3 - [GAPR1_HUMAN]             |
| Q13642 | 0.7510 | -0.4131 | 9.39E-04 | FHL1  | Four and a half LIM domains<br>protein 1 OS=Homo sapiens<br>GN=FHL1 PE=1 SV=4 -<br>[FHL1_HUMAN]                                |
| Q9H1K1 | 1.2296 | 0.2982  | 9.43E-04 | ISCU  | Iron-sulfur cluster assembly<br>enzyme ISCU, mitochondrial<br>OS=Homo sapiens GN=ISCU PE=1<br>SV=2 - [ISCU_HUMAN]              |
| Q9BQI0 | 0.7501 | -0.4147 | 9.48E-04 | AIF1L | Allograft inflammatory factor 1-<br>like OS=Homo sapiens GN=AIF1L<br>PE=1 SV=1 - [AIF1L_HUMAN]                                 |
| Q86U70 | 1.2254 | 0.2933  | 9.53E-04 | LDB1  | LIM domain-binding protein 1<br>OS=Homo sapiens GN=LDB1 PE=1<br>SV=2 - [LDB1_HUMAN]                                            |
| Q9UDY8 | 1.2785 | 0.3545  | 9.62E-04 | MALT1 | Mucosa-associated lymphoid tissue<br>lymphoma translocation protein 1<br>OS=Homo sapiens GN=MALT1<br>PE=1 SV=1 - [MALT1_HUMAN] |
| P00441 | 1.1489 | 0.2003  | 9.80E-04 | SODC  | Superoxide dismutase [Cu-Zn]<br>OS=Homo sapiens GN=SOD1 PE=1<br>SV=2 - [SODC_HUMAN]                                            |
| Q8TDR0 | 1.6741 | 0.7434  | 1.02E-03 | MIPT3 | TRAF3-interacting protein 1<br>OS=Homo sapiens GN=TRAF3IP1<br>PE=1 SV=1 - [MIPT3_HUMAN]                                        |
| P46087 | 0.8459 | -0.2414 | 1.02E-03 | NOP2  | Putative ribosomal RNA<br>methyltransferase NOP2 OS=Homo<br>sapiens GN=NOP2 PE=1 SV=2 -<br>[NOP2_HUMAN]                        |
| Q9UBN6 | 0.7256 | -0.4627 | 1.03E-03 | TR10D | Tumor necrosis factor receptor<br>superfamily member 10D<br>OS=Homo sapiens GN=TNFRSF10D<br>PE=1 SV=1 - [TR10D_HUMAN]          |
| O14683 | 0.8432 | -0.2460 | 1.03E-03 | P5I11 | Tumor protein p53-inducible<br>protein 11 OS=Homo sapiens<br>GN=TP53I11 PE=1 SV=2 -<br>[P5I11_HUMAN]                           |
| Q14644 | 0.8178 | -0.2901 | 1.04E-03 | RASA3 | Ras GTPase-activating protein 3<br>OS=Homo sapiens GN=RASA3 PE=1<br>SV=3 - [RASA3_HUMAN]                                       |
| Q13510 | 1.1534 | 0.2059  | 1.04E-03 | ASAH1 | Acid ceramidase OS=Homo sapiens<br>GN=ASAH1 PE=1 SV=5 -<br>[ASAH1_HUMAN]                                                       |
| Q9BV79 | 1.1838 | 0.2435  | 1.04E-03 | MECR  | Trans-2-enoyl-CoA reductase,<br>mitochondrial OS=Homo sapiens<br>GN=MECR PE=1 SV=2 -<br>[MECR_HUMAN]                           |

|        |        |         |          |       |                                                                                                                                 |
|--------|--------|---------|----------|-------|---------------------------------------------------------------------------------------------------------------------------------|
| Q9UKD2 | 0.8075 | -0.3084 | 1.05E-03 | MRT4  | mRNA turnover protein 4 homolog<br>OS=Homo sapiens GN=MRT04<br>PE=1 SV=2 - [MRT4_HUMAN]                                         |
| O60507 | 1.2204 | 0.2874  | 1.06E-03 | TPST1 | Protein-tyrosine sulfotransferase 1<br>OS=Homo sapiens GN=TPST1 PE=2<br>SV=1 - [TPST1_HUMAN]                                    |
| Q3MIP1 | 0.7324 | -0.4493 | 1.07E-03 | IPIL2 | Inositol 1,4,5-trisphosphate<br>receptor-interacting protein-like 2<br>OS=Homo sapiens GN=ITPRIPL2<br>PE=1 SV=1 - [IPIL2_HUMAN] |
| Q8IXS6 | 0.8502 | -0.2342 | 1.08E-03 | PALM2 | Paralemmin-2 OS=Homo sapiens<br>GN=PALM2 PE=2 SV=3 -<br>[PALM2_HUMAN]                                                           |
| P35052 | 1.3421 | 0.4245  | 1.09E-03 | GPC1  | Glypican-1 OS=Homo sapiens<br>GN=GPC1 PE=1 SV=2 -<br>[GPC1_HUMAN]                                                               |
| Q8WWI5 | 1.2037 | 0.2674  | 1.09E-03 | CTL1  | Choline transporter-like protein 1<br>OS=Homo sapiens GN=SLC44A1<br>PE=1 SV=1 - [CTL1_HUMAN]                                    |
| Q86WK6 | 1.1589 | 0.2128  | 1.09E-03 | AMG01 | Amphoterin-induced protein 1<br>OS=Homo sapiens GN=AMIGO1<br>PE=1 SV=1 - [AMG01_HUMAN]                                          |
| P55061 | 1.4184 | 0.5042  | 1.10E-03 | BI1   | Bax inhibitor 1 OS=Homo sapiens<br>GN=TMBIM6 PE=1 SV=2 -<br>[BI1_HUMAN]                                                         |
| Q9UHY7 | 0.8213 | -0.2841 | 1.10E-03 | ENOPH | Enolase-phosphatase E1 OS=Homo<br>sapiens GN=ENOPH1 PE=1 SV=1 -<br>[ENOPH_HUMAN]                                                |
| Q6KF10 | 0.7637 | -0.3890 | 1.12E-03 | GDF6  | Growth/differentiation factor 6<br>OS=Homo sapiens GN=GDF6 PE=1<br>SV=1 - [GDF6_HUMAN]                                          |
| P10915 | 2.5432 | 1.3466  | 1.12E-03 | HPLN1 | Hyaluronan and proteoglycan link<br>protein 1 OS=Homo sapiens<br>GN=HAPLN1 PE=2 SV=2 -<br>[HPLN1_HUMAN]                         |
| Q9Y4C8 | 0.8497 | -0.2350 | 1.13E-03 | RBM19 | Probable RNA-binding protein 19<br>OS=Homo sapiens GN=RBM19<br>PE=1 SV=3 - [RBM19_HUMAN]                                        |
| Q9BVP2 | 0.7977 | -0.3260 | 1.13E-03 | GNL3  | Guanine nucleotide-binding<br>protein-like 3 OS=Homo sapiens<br>GN=GNL3 PE=1 SV=2 -<br>[GNL3_HUMAN]                             |
| P24941 | 1.1637 | 0.2187  | 1.14E-03 | CDK2  | Cyclin-dependent kinase 2<br>OS=Homo sapiens GN=CDK2 PE=1<br>SV=2 - [CDK2_HUMAN]                                                |
| Q15800 | 0.6306 | -0.6652 | 1.16E-03 | MSM01 | Methylsterol monooxygenase 1<br>OS=Homo sapiens GN=MSM01<br>PE=1 SV=1 - [MSM01_HUMAN]                                           |
| Q13303 | 1.2851 | 0.3618  | 1.16E-03 | KCAB2 | Voltage-gated potassium channel<br>subunit beta-2 OS=Homo sapiens<br>GN=KCNAB2 PE=1 SV=2 -<br>[KCAB2_HUMAN]                     |
| P78524 | 1.2193 | 0.2861  | 1.19E-03 | ST5   | Suppression of tumorigenicity 5<br>protein OS=Homo sapiens GN=ST5<br>PE=1 SV=3 - [ST5_HUMAN]                                    |
| Q9H7S9 | 0.7192 | -0.4755 | 1.22E-03 | ZN703 | Zinc finger protein 703 OS=Homo<br>sapiens GN=ZNF703 PE=1 SV=1 -<br>[ZN703_HUMAN]                                               |
| P49916 | 1.1637 | 0.2187  | 1.24E-03 | DNLI3 | DNA ligase 3 OS=Homo sapiens<br>GN=LIG3 PE=1 SV=2 -<br>[DNLI3_HUMAN]                                                            |
| Q9UDW1 | 1.1775 | 0.2357  | 1.24E-03 | QCR9  | Cytochrome b-c1 complex subunit<br>9 OS=Homo sapiens GN=UQCR10<br>PE=1 SV=3 - [QCR9_HUMAN]                                      |



|        |        |         |          |       |                                                                                                                        |
|--------|--------|---------|----------|-------|------------------------------------------------------------------------------------------------------------------------|
| Q6WKZ4 | 0.8099 | -0.3041 | 1.24E-03 | RFIP1 | Rab11 family-interacting protein 1<br>OS=Homo sapiens GN=RAB11FIP1<br>PE=1 SV=3 - [RFIP1_HUMAN]                        |
| P29373 | 1.2625 | 0.3363  | 1.24E-03 | RABP2 | Cellular retinoic acid-binding<br>protein 2 OS=Homo sapiens<br>GN=CRABP2 PE=1 SV=2 -<br>[RABP2_HUMAN]                  |
| P10253 | 1.1491 | 0.2006  | 1.25E-03 | LYAG  | Lysosomal alpha-glucosidase<br>OS=Homo sapiens GN=GAA PE=1<br>SV=4 - [LYAG_HUMAN]                                      |
| Q7Z7L8 | 1.4534 | 0.5394  | 1.25E-03 | CK096 | Uncharacterized protein C11orf96<br>OS=Homo sapiens GN=C11orf96<br>PE=1 SV=3 - [CK096_HUMAN]                           |
| P05412 | 0.7970 | -0.3273 | 1.26E-03 | JUN   | Transcription factor AP-1<br>OS=Homo sapiens GN=JUN PE=1<br>SV=2 - [JUN_HUMAN]                                         |
| Q6ULP2 | 0.8496 | -0.2351 | 1.26E-03 | AFTIN | Aftiphilin OS=Homo sapiens<br>GN=AFTPH PE=1 SV=2 -<br>[AFTIN_HUMAN]                                                    |
| Q6PD62 | 0.8326 | -0.2644 | 1.30E-03 | CTR9  | RNA polymerase-associated<br>protein CTR9 homolog OS=Homo<br>sapiens GN=CTR9 PE=1 SV=1 -<br>[CTR9_HUMAN]               |
| Q99523 | 0.8262 | -0.2754 | 1.33E-03 | SORT  | Sortilin OS=Homo sapiens<br>GN=SORT1 PE=1 SV=3 -<br>[SORT_HUMAN]                                                       |
| 075815 | 0.8456 | -0.2420 | 1.33E-03 | BCAR3 | Breast cancer anti-estrogen<br>resistance protein 3 OS=Homo<br>sapiens GN=BCAR3 PE=1 SV=1 -<br>[BCAR3_HUMAN]           |
| Q29983 | 0.7877 | -0.3443 | 1.33E-03 | MICA  | MHC class I polypeptide-related<br>sequence A OS=Homo sapiens<br>GN=MICA PE=1 SV=1 -<br>[MICA_HUMAN]                   |
| 060437 | 1.5076 | 0.5923  | 1.35E-03 | PEPL  | Periplakin OS=Homo sapiens<br>GN=PPL PE=1 SV=4 -<br>[PEPL_HUMAN]                                                       |
| Q3SXM5 | 1.2597 | 0.3331  | 1.38E-03 | HSDL1 | Inactive hydroxysteroid<br>dehydrogenase-like protein 1<br>OS=Homo sapiens GN=HSDL1<br>PE=1 SV=3 - [HSDL1_HUMAN]       |
| A1L390 | 0.6985 | -0.5176 | 1.39E-03 | PKHG3 | Pleckstrin homology domain-<br>containing family G member 3<br>OS=Homo sapiens GN=PLEKHG3<br>PE=1 SV=1 - [PKHG3_HUMAN] |
| P10620 | 1.1611 | 0.2154  | 1.39E-03 | MGST1 | Microsomal glutathione S-<br>transferase 1 OS=Homo sapiens<br>GN=MGST1 PE=1 SV=1 -<br>[MGST1_HUMAN]                    |
| Q16890 | 1.1778 | 0.2361  | 1.40E-03 | TPD53 | Tumor protein D53 OS=Homo<br>sapiens GN=TPD52L1 PE=1 SV=1 -<br>[TPD53_HUMAN]                                           |
| Q96LJ7 | 1.2125 | 0.2780  | 1.40E-03 | DHRS1 | Dehydrogenase/reductase SDR<br>family member 1 OS=Homo<br>sapiens GN=DHRS1 PE=1 SV=1 -<br>[DHRS1_HUMAN]                |
| P14921 | 0.8439 | -0.2448 | 1.45E-03 | ETS1  | Protein C-ets-1 OS=Homo sapiens<br>GN=ETS1 PE=1 SV=1 -<br>[ETS1_HUMAN]                                                 |
| Q8N6G6 | 0.8416 | -0.2488 | 1.45E-03 | ATL1  | ADAMTS-like protein 1 OS=Homo<br>sapiens GN=ADAMTSL1 PE=1 SV=4<br>- [ATL1_HUMAN]                                       |

|        |        |         |          |       |                                                                                                                 |
|--------|--------|---------|----------|-------|-----------------------------------------------------------------------------------------------------------------|
| Q8IWA0 | 0.8488 | -0.2365 | 1.46E-03 | WDR75 | WD repeat-containing protein 75<br>OS=Homo sapiens GN=WDR75<br>PE=1 SV=1 - [WDR75_HUMAN]                        |
| P55268 | 1.1883 | 0.2489  | 1.49E-03 | LAMB2 | Laminin subunit beta-2 OS=Homo sapiens GN=LAMB2 PE=1 SV=2 - [LAMB2_HUMAN]                                       |
| Q969X1 | 0.7506 | -0.4138 | 1.49E-03 | LFG3  | Protein lifeguard 3 OS=Homo sapiens GN=TMBIM1 PE=1 SV=2 - [LFG3_HUMAN]                                          |
| O75781 | 1.2367 | 0.3065  | 1.50E-03 | PALM  | Paralemmin-1 OS=Homo sapiens GN=PALM PE=1 SV=2 - [PALM_HUMAN]                                                   |
| P07711 | 1.2554 | 0.3281  | 1.52E-03 | CATL1 | Cathepsin L1 OS=Homo sapiens GN=CTSL PE=1 SV=2 - [CATL1_HUMAN]                                                  |
| Q6YHK3 | 1.2185 | 0.2851  | 1.52E-03 | CD109 | CD109 antigen OS=Homo sapiens GN=CD109 PE=1 SV=2 - [CD109_HUMAN]                                                |
| Q86Y56 | 0.8288 | -0.2709 | 1.55E-03 | HEAT2 | HEAT repeat-containing protein 2 OS=Homo sapiens GN=HEATR2 PE=1 SV=4 - [HEAT2_HUMAN]                            |
| O60279 | 1.1613 | 0.2158  | 1.56E-03 | SUSD5 | Sushi domain-containing protein 5 OS=Homo sapiens GN=SUSD5 PE=1 SV=3 - [SUSD5_HUMAN]                            |
| O00488 | 0.7139 | -0.4861 | 1.57E-03 | ZN593 | Zinc finger protein 593 OS=Homo sapiens GN=ZNF593 PE=1 SV=2 - [ZN593_HUMAN]                                     |
| P48061 | 1.2105 | 0.2756  | 1.58E-03 | SDF1  | Stromal cell-derived factor 1 OS=Homo sapiens GN=CXCL12 PE=1 SV=1 - [SDF1_HUMAN]                                |
| Q8TDX6 | 0.8001 | -0.3217 | 1.59E-03 | CGAT1 | Chondroitin sulfate N-acetylgalactosaminyltransferase 1 OS=Homo sapiens GN=CSGALNACT1 PE=1 SV=2 - [CGAT1_HUMAN] |
| Q96SL4 | 1.1505 | 0.2023  | 1.60E-03 | GPX7  | Glutathione peroxidase 7 OS=Homo sapiens GN=GPX7 PE=1 SV=1 - [GPX7_HUMAN]                                       |
| O75298 | 1.2034 | 0.2671  | 1.61E-03 | RTN2  | Reticulon-2 OS=Homo sapiens GN=RTN2 PE=1 SV=1 - [RTN2_HUMAN]                                                    |
| Q16877 | 0.7507 | -0.4138 | 1.69E-03 | F264  | 6-phosphofructo-2-kinase/fructose-2,6-bisphosphatase 4 OS=Homo sapiens GN=PFKFB4 PE=2 SV=6 - [F264_HUMAN]       |
| Q9H583 | 0.8479 | -0.2381 | 1.70E-03 | HEAT1 | HEAT repeat-containing protein 1 OS=Homo sapiens GN=HEATR1 PE=1 SV=3 - [HEAT1_HUMAN]                            |
| P17900 | 1.2254 | 0.2932  | 1.77E-03 | SAP3  | Ganglioside GM2 activator OS=Homo sapiens GN=GM2A PE=1 SV=4 - [SAP3_HUMAN]                                      |
| Q9C035 | 0.8422 | -0.2478 | 1.77E-03 | TRIM5 | Tripartite motif-containing protein 5 OS=Homo sapiens GN=TRIM5 PE=1 SV=1 - [TRIM5_HUMAN]                        |
| Q6PCB0 | 1.2145 | 0.2803  | 1.80E-03 | VWA1  | von Willebrand factor A domain-containing protein 1 OS=Homo sapiens GN=VWA1 PE=2 SV=1 - [VWA1_HUMAN]            |
| Q8N5M1 | 1.2478 | 0.3194  | 1.83E-03 | ATPF2 | ATP synthase mitochondrial F1 complex assembly factor 2 OS=Homo sapiens GN=ATPAF2 PE=1 SV=1 - [ATPF2_HUMAN]     |

|        |        |         |          |       |                                                                                                                                                            |
|--------|--------|---------|----------|-------|------------------------------------------------------------------------------------------------------------------------------------------------------------|
| 075845 | 0.6951 | -0.5247 | 1.83E-03 | SC5D  | Lathosterol oxidase OS=Homo sapiens GN=SC5D PE=1 SV=2 - [SC5D_HUMAN]                                                                                       |
| 060565 | 1.7279 | 0.7890  | 1.84E-03 | GREM1 | Gremlin-1 OS=Homo sapiens GN=GREM1 PE=1 SV=1 - [GREM1_HUMAN]                                                                                               |
| 000244 | 1.3201 | 0.4006  | 1.85E-03 | ATOX1 | Copper transport protein ATOX1 OS=Homo sapiens GN=ATOX1 PE=1 SV=1 - [ATOX1_HUMAN]                                                                          |
| P15153 | 0.8153 | -0.2947 | 1.87E-03 | RAC2  | Ras-related C3 botulinum toxin substrate 2 OS=Homo sapiens GN=RAC2 PE=1 SV=1 - [RAC2_HUMAN]                                                                |
| P36021 | 1.4016 | 0.4871  | 1.88E-03 | MOT8  | Monocarboxylate transporter 8 OS=Homo sapiens GN=SLC16A2 PE=1 SV=2 - [MOT8_HUMAN]                                                                          |
| Q13247 | 0.8235 | -0.2802 | 1.93E-03 | SRSF6 | Serine/arginine-rich splicing factor 6 OS=Homo sapiens GN=SRSF6 PE=1 SV=2 - [SRSF6_HUMAN]                                                                  |
| Q86YS7 | 0.7666 | -0.3835 | 1.93E-03 | C2CD5 | C2 domain-containing protein 5 OS=Homo sapiens GN=C2CD5 PE=1 SV=1 - [C2CD5_HUMAN]                                                                          |
| Q5T5C0 | 1.2466 | 0.3180  | 1.94E-03 | STXB5 | Syntaxin-binding protein 5 OS=Homo sapiens GN=STXBP5 PE=1 SV=1 - [STXB5_HUMAN]                                                                             |
| P33991 | 0.7901 | -0.3399 | 1.94E-03 | MCM4  | DNA replication licensing factor MCM4 OS=Homo sapiens GN=MCM4 PE=1 SV=5 - [MCM4_HUMAN]                                                                     |
| P11182 | 1.2041 | 0.2679  | 1.94E-03 | ODB2  | Lipoamide acyltransferase component of branched-chain alpha-keto acid dehydrogenase complex, mitochondrial OS=Homo sapiens GN=DBT PE=1 SV=3 - [ODB2_HUMAN] |
| Q6RFH5 | 0.7660 | -0.3845 | 1.96E-03 | WDR74 | WD repeat-containing protein 74 OS=Homo sapiens GN=WDR74 PE=1 SV=1 - [WDR74_HUMAN]                                                                         |
| Q96JG8 | 0.6670 | -0.5842 | 1.96E-03 | MAGD4 | Melanoma-associated antigen D4 OS=Homo sapiens GN=MAGED4 PE=1 SV=3 - [MAGD4_HUMAN]                                                                         |
| Q15154 | 0.8277 | -0.2728 | 1.97E-03 | PCM1  | Pericentriolar material 1 protein OS=Homo sapiens GN=PCM1 PE=1 SV=4 - [PCM1_HUMAN]                                                                         |
| Q9H6X2 | 1.7232 | 0.7851  | 1.97E-03 | ANTR1 | Anthrax toxin receptor 1 OS=Homo sapiens GN=ANTXR1 PE=1 SV=2 - [ANTR1_HUMAN]                                                                               |
| P34741 | 0.8456 | -0.2420 | 1.99E-03 | SDC2  | Syndecan-2 OS=Homo sapiens GN=SDC2 PE=1 SV=2 - [SDC2_HUMAN]                                                                                                |
| P42766 | 0.8286 | -0.2713 | 2.08E-03 | RL35  | 60S ribosomal protein L35 OS=Homo sapiens GN=RPL35 PE=1 SV=2 - [RL35_HUMAN]                                                                                |
| Q9BS40 | 1.1577 | 0.2112  | 2.11E-03 | LXN   | Latexin OS=Homo sapiens GN=LXN PE=1 SV=2 - [LXN_HUMAN]                                                                                                     |
| Q9Y5U2 | 1.4592 | 0.5452  | 2.14E-03 | TSSC4 | Protein TSSC4 OS=Homo sapiens GN=TSSC4 PE=1 SV=3 - [TSSC4_HUMAN]                                                                                           |
| Q9NQ55 | 0.8259 | -0.2760 | 2.18E-03 | SSF1  | Suppressor of SWI4 1 homolog OS=Homo sapiens GN=PPAN PE=1 SV=1 - [SSF1_HUMAN]                                                                              |
| Q9H089 | 0.8509 | -0.2330 | 2.21E-03 | LSG1  | Large subunit GTPase 1 homolog OS=Homo sapiens GN=LSG1 PE=1 SV=2 - [LSG1_HUMAN]                                                                            |

|        |        |         |          |       |                                                                                                            |
|--------|--------|---------|----------|-------|------------------------------------------------------------------------------------------------------------|
| Q96IZ0 | 1.2186 | 0.2853  | 2.29E-03 | PAWR  | PRKC apoptosis WT1 regulator protein OS=Homo sapiens GN=PAWR PE=1 SV=1 - [PAWR_HUMAN]                      |
| Q6NW40 | 0.5176 | -0.9500 | 2.29E-03 | RGMB  | RGM domain family member B OS=Homo sapiens GN=RGMB PE=1 SV=3 - [RGMB_HUMAN]                                |
| P60033 | 1.1518 | 0.2039  | 2.32E-03 | CD81  | CD81 antigen OS=Homo sapiens GN=CD81 PE=1 SV=1 - [CD81_HUMAN]                                              |
| Q9UMY1 | 0.8090 | -0.3057 | 2.34E-03 | NOL7  | Nucleolar protein 7 OS=Homo sapiens GN=NOL7 PE=1 SV=2 - [NOL7_HUMAN]                                       |
| Q6UXV4 | 1.1734 | 0.2307  | 2.41E-03 | APOOL | Apolipoprotein O-like OS=Homo sapiens GN=APOOL PE=1 SV=1 - [APOOL_HUMAN]                                   |
| Q13454 | 1.1522 | 0.2044  | 2.61E-03 | TUSC3 | Tumor suppressor candidate 3 OS=Homo sapiens GN=TUSC3 PE=1 SV=1 - [TUSC3_HUMAN]                            |
| P63096 | 1.2791 | 0.3551  | 2.69E-03 | GNAI1 | Guanine nucleotide-binding protein G(i) subunit alpha-1 OS=Homo sapiens GN=GNAI1 PE=1 SV=2 - [GNAI1_HUMAN] |
| P08727 | 1.1644 | 0.2196  | 2.77E-03 | K1C19 | Keratin, type I cytoskeletal 19 OS=Homo sapiens GN=KRT19 PE=1 SV=4 - [K1C19_HUMAN]                         |
| O43159 | 0.8301 | -0.2686 | 2.80E-03 | RRP8  | Ribosomal RNA-processing protein 8 OS=Homo sapiens GN=RRP8 PE=1 SV=2 - [RRP8_HUMAN]                        |
| Q92947 | 1.1709 | 0.2276  | 2.81E-03 | GCDH  | Glutaryl-CoA dehydrogenase, mitochondrial OS=Homo sapiens GN=GCDH PE=1 SV=1 - [GCDH_HUMAN]                 |
| O95478 | 0.7827 | -0.3535 | 2.94E-03 | NSA2  | Ribosome biogenesis protein NSA2 homolog OS=Homo sapiens GN=NSA2 PE=1 SV=1 - [NSA2_HUMAN]                  |
| P08651 | 1.1946 | 0.2566  | 2.95E-03 | NFIC  | Nuclear factor 1 C-type OS=Homo sapiens GN=NFIC PE=1 SV=2 - [NFIC_HUMAN]                                   |
| Q9H7B2 | 0.8517 | -0.2317 | 2.98E-03 | RPF2  | Ribosome production factor 2 homolog OS=Homo sapiens GN=RPF2 PE=1 SV=2 - [RPF2_HUMAN]                      |
| P28347 | 1.1597 | 0.2137  | 2.99E-03 | TEAD1 | Transcriptional enhancer factor TEF-1 OS=Homo sapiens GN=TEAD1 PE=1 SV=2 - [TEAD1_HUMAN]                   |
| Q9BV19 | 1.3945 | 0.4797  | 3.04E-03 | CA050 | Uncharacterized protein C1orf50 OS=Homo sapiens GN=C1orf50 PE=1 SV=2 - [CA050_HUMAN]                       |
| Q9UBU8 | 0.8328 | -0.2640 | 3.05E-03 | MO4L1 | Mortality factor 4-like protein 1 OS=Homo sapiens GN=MORF4L1 PE=1 SV=2 - [MO4L1_HUMAN]                     |
| Q9P0P0 | 0.8137 | -0.2974 | 3.06E-03 | RN181 | E3 ubiquitin-protein ligase RNF181 OS=Homo sapiens GN=RNF181 PE=1 SV=1 - [RN181_HUMAN]                     |
| Q92484 | 1.1843 | 0.2440  | 3.07E-03 | ASM3A | Acid sphingomyelinase-like phosphodiesterase 3a OS=Homo sapiens GN=SMPDL3A PE=1 SV=2 - [ASM3A_HUMAN]       |
| A1A4S6 | 0.8398 | -0.2520 | 3.08E-03 | RHG10 | Rho GTPase-activating protein 10 OS=Homo sapiens GN=ARHGAP10 PE=1 SV=1 - [RHG10_HUMAN]                     |

|        |        |         |          |       |                                                                                                                       |
|--------|--------|---------|----------|-------|-----------------------------------------------------------------------------------------------------------------------|
| A6NJ78 | 1.3680 | 0.4520  | 3.09E-03 | MET15 | Probable methyltransferase-like protein 15 OS=Homo sapiens GN=METTLL15 PE=2 SV=1 - [MET15_HUMAN]                      |
| Q9NRA1 | 1.3210 | 0.4016  | 3.12E-03 | PDGFC | Platelet-derived growth factor C OS=Homo sapiens GN=PDGFC PE=1 SV=2 - [PDGFC_HUMAN]                                   |
| Q96CB9 | 1.1630 | 0.2178  | 3.24E-03 | NSUN4 | 5-methylcytosine rRNA methyltransferase NSUN4 OS=Homo sapiens GN=NSUN4 PE=1 SV=2 - [NSUN4_HUMAN]                      |
| Q9NUM4 | 1.1515 | 0.2035  | 3.25E-03 | T106B | Transmembrane protein 106B OS=Homo sapiens GN=TMEM106B PE=1 SV=2 - [T106B_HUMAN]                                      |
| Q9BYC9 | 0.8274 | -0.2733 | 3.37E-03 | RM20  | 39S ribosomal protein L20, mitochondrial OS=Homo sapiens GN=MRPL20 PE=1 SV=1 - [RM20_HUMAN]                           |
| Q9Y312 | 0.4902 | -1.0286 | 3.46E-03 | AAR2  | Protein AAR2 homolog OS=Homo sapiens GN=AAR2 PE=1 SV=2 - [AAR2_HUMAN]                                                 |
| Q9HD67 | 0.7001 | -0.5144 | 3.52E-03 | MYO10 | Unconventional myosin-X OS=Homo sapiens GN=MYO10 PE=1 SV=3 - [MYO10_HUMAN]                                            |
| Q96RW7 | 1.1768 | 0.2348  | 3.56E-03 | HMCN1 | Hemicentin-1 OS=Homo sapiens GN=HMCN1 PE=1 SV=2 - [HMCN1_HUMAN]                                                       |
| Q99538 | 1.1625 | 0.2172  | 3.56E-03 | LGMN  | Legumain OS=Homo sapiens GN=LGMN PE=1 SV=1 - [LGMN_HUMAN]                                                             |
| Q9Y2V2 | 1.1762 | 0.2341  | 3.64E-03 | CHSP1 | Calcium-regulated heat stable protein 1 OS=Homo sapiens GN=CARHSP1 PE=1 SV=2 - [CHSP1_HUMAN]                          |
| Q6FIF0 | 0.8312 | -0.2668 | 3.64E-03 | ZFAN6 | AN1-type zinc finger protein 6 OS=Homo sapiens GN=ZFAND6 PE=1 SV=2 - [ZFAN6_HUMAN]                                    |
| P20674 | 1.1867 | 0.2469  | 3.66E-03 | COX5A | Cytochrome c oxidase subunit 5A, mitochondrial OS=Homo sapiens GN=COX5A PE=1 SV=2 - [COX5A_HUMAN]                     |
| Q9BXS4 | 1.3215 | 0.4021  | 3.70E-03 | TMM59 | Transmembrane protein 59 OS=Homo sapiens GN=TMEM59 PE=1 SV=1 - [TMM59_HUMAN]                                          |
| P08697 | 1.8276 | 0.8700  | 3.72E-03 | A2AP  | Alpha-2-antiplasmin OS=Homo sapiens GN=SERPINF2 PE=1 SV=3 - [A2AP_HUMAN]                                              |
| Q68D10 | 0.8142 | -0.2965 | 3.73E-03 | SPT2  | Protein SPT2 homolog OS=Homo sapiens GN=SPTY2D1 PE=1 SV=3 - [SPT2_HUMAN]                                              |
| Q15118 | 0.8018 | -0.3187 | 3.79E-03 | PDK1  | [Pyruvate dehydrogenase [lipoamide]] kinase isozyme 1, mitochondrial OS=Homo sapiens GN=PDK1 PE=1 SV=1 - [PDK1_HUMAN] |
| P78316 | 0.8350 | -0.2601 | 3.84E-03 | NOP14 | Nucleolar protein 14 OS=Homo sapiens GN=NOP14 PE=1 SV=3 - [NOP14_HUMAN]                                               |
| Q9Y3C1 | 0.7940 | -0.3329 | 3.87E-03 | NOP16 | Nucleolar protein 16 OS=Homo sapiens GN=NOP16 PE=1 SV=2 - [NOP16_HUMAN]                                               |
| P42677 | 0.8489 | -0.2363 | 3.90E-03 | RS27  | 40S ribosomal protein S27 OS=Homo sapiens GN=RPS27 PE=1 SV=3 - [RS27_HUMAN]                                           |

|        |        |         |          |       |                                                                                                                              |
|--------|--------|---------|----------|-------|------------------------------------------------------------------------------------------------------------------------------|
| P09758 | 0.7563 | -0.4029 | 3.95E-03 | TACD2 | Tumor-associated calcium signal transducer 2 OS=Homo sapiens GN=TACSTD2 PE=1 SV=3 - [TACD2_HUMAN]                            |
| O60306 | 0.8499 | -0.2347 | 3.96E-03 | AQR   | Intron-binding protein aquarius OS=Homo sapiens GN=AQR PE=1 SV=4 - [AQR_HUMAN]                                               |
| Q9H7C9 | 1.1689 | 0.2251  | 3.96E-03 | AAMDC | Mth938 domain-containing protein OS=Homo sapiens GN=AAMDC PE=1 SV=1 - [AAMDC_HUMAN]                                          |
| P29972 | 0.7048 | -0.5047 | 4.00E-03 | AQP1  | Aquaporin-1 OS=Homo sapiens GN=AQP1 PE=1 SV=3 - [AQP1_HUMAN]                                                                 |
| P62861 | 0.8507 | -0.2332 | 4.16E-03 | RS30  | 40S ribosomal protein S30 OS=Homo sapiens GN=FAU PE=1 SV=1 - [RS30_HUMAN]                                                    |
| Q8NCS4 | 1.3194 | 0.3998  | 4.18E-03 | ZMYNB | Uncharacterized protein ZMYM6NB OS=Homo sapiens GN=ZMYM6NB PE=2 SV=1 - [ZMYNB_HUMAN]                                         |
| P56937 | 0.7719 | -0.3735 | 4.28E-03 | DHB7  | 3-keto-steroid reductase OS=Homo sapiens GN=HSD17B7 PE=1 SV=1 - [DHB7_HUMAN]                                                 |
| Q5T0D9 | 0.7969 | -0.3276 | 4.32E-03 | TPRGL | Tumor protein p63-regulated gene 1-like protein OS=Homo sapiens GN=TPRG1L PE=1 SV=1 - [TPRGL_HUMAN]                          |
| P27658 | 1.1746 | 0.2322  | 4.34E-03 | CO8A1 | Collagen alpha-1(VIII) chain OS=Homo sapiens GN=COL8A1 PE=1 SV=2 - [CO8A1_HUMAN]                                             |
| Q15678 | 0.7553 | -0.4049 | 4.37E-03 | PTN14 | Tyrosine-protein phosphatase non-receptor type 14 OS=Homo sapiens GN=PTPN14 PE=1 SV=2 - [PTN14_HUMAN]                        |
| Q99805 | 1.1491 | 0.2005  | 4.37E-03 | TM9S2 | Transmembrane 9 superfamily member 2 OS=Homo sapiens GN=TM9SF2 PE=1 SV=1 - [TM9S2_HUMAN]                                     |
| Q9NQ89 | 1.4543 | 0.5403  | 4.67E-03 | CL004 | Uncharacterized protein C12orf4 OS=Homo sapiens GN=C12orf4 PE=2 SV=1 - [CL004_HUMAN]                                         |
| O60739 | 0.8470 | -0.2396 | 4.72E-03 | EIF1B | Eukaryotic translation initiation factor 1b OS=Homo sapiens GN=EIF1B PE=1 SV=2 - [EIF1B_HUMAN]                               |
| P17676 | 1.4754 | 0.5611  | 4.87E-03 | CEBPB | CCAAT/enhancer-binding protein beta OS=Homo sapiens GN=CEBPB PE=1 SV=2 - [CEBPB_HUMAN]                                       |
| Q9P0J1 | 0.7593 | -0.3973 | 5.05E-03 | PDP1  | [Pyruvate dehydrogenase [acetyl-transferring]]-phosphatase 1, mitochondrial OS=Homo sapiens GN=PDP1 PE=1 SV=3 - [PDP1_HUMAN] |
| Q04727 | 1.2221 | 0.2894  | 5.11E-03 | TLE4  | Transducin-like enhancer protein 4 OS=Homo sapiens GN=TLE4 PE=1 SV=3 - [TLE4_HUMAN]                                          |
| P10606 | 1.4280 | 0.5140  | 5.12E-03 | COX5B | Cytochrome c oxidase subunit 5B, mitochondrial OS=Homo sapiens GN=COX5B PE=1 SV=2 - [COX5B_HUMAN]                            |
| Q8N2Y8 | 1.1501 | 0.2018  | 5.13E-03 | RUSC2 | Iporin OS=Homo sapiens GN=RUSC2 PE=1 SV=3 - [RUSC2_HUMAN]                                                                    |

|        |        |         |          |       |                                                                                                                                            |
|--------|--------|---------|----------|-------|--------------------------------------------------------------------------------------------------------------------------------------------|
| P28161 | 1.2017 | 0.2651  | 5.23E-03 | GSTM2 | Glutathione S-transferase Mu 2<br>OS=Homo sapiens GN=GSTM2<br>PE=1 SV=2 - [GSTM2_HUMAN]                                                    |
| Q8WU10 | 0.7895 | -0.3410 | 5.53E-03 | PYRD1 | Pyridine nucleotide-disulfide<br>oxidoreductase domain-containing<br>protein 1 OS=Homo sapiens<br>GN=PYROXD1 PE=1 SV=1 -<br>[PYRD1_HUMAN]  |
| Q9H8H0 | 0.8190 | -0.2881 | 5.64E-03 | NOL11 | Nucleolar protein 11 OS=Homo<br>sapiens GN=NOL11 PE=1 SV=1 -<br>[NOL11_HUMAN]                                                              |
| Q9Y4J8 | 0.8517 | -0.2316 | 5.82E-03 | DTNA  | Dystrobrevin alpha OS=Homo<br>sapiens GN=DTNA PE=1 SV=2 -<br>[DTNA_HUMAN]                                                                  |
| Q15031 | 1.1536 | 0.2062  | 5.92E-03 | SYLM  | Probable leucine--tRNA ligase,<br>mitochondrial OS=Homo sapiens<br>GN=LARS2 PE=1 SV=2 -<br>[SYLM_HUMAN]                                    |
| O95169 | 1.1689 | 0.2252  | 6.06E-03 | NDUB8 | NADH dehydrogenase<br>[ubiquinone] 1 beta subcomplex<br>subunit 8, mitochondrial OS=Homo<br>sapiens GN=NDUFB8 PE=1 SV=1 -<br>[NDUB8_HUMAN] |
| P19634 | 1.1790 | 0.2376  | 6.06E-03 | SL9A1 | Sodium/hydrogen exchanger 1<br>OS=Homo sapiens GN=SLC9A1<br>PE=1 SV=2 - [SL9A1_HUMAN]                                                      |
| O15397 | 0.7674 | -0.3819 | 6.08E-03 | IPO8  | Importin-8 OS=Homo sapiens<br>GN=IPO8 PE=1 SV=2 -<br>[IPO8_HUMAN]                                                                          |
| Q9Y5V0 | 0.8411 | -0.2496 | 6.21E-03 | ZN706 | Zinc finger protein 706 OS=Homo<br>sapiens GN=ZNF706 PE=1 SV=1 -<br>[ZN706_HUMAN]                                                          |
| Q8N1W1 | 0.8282 | -0.2720 | 6.28E-03 | ARG28 | Rho guanine nucleotide exchange<br>factor 28 OS=Homo sapiens<br>GN=ARHGEF28 PE=1 SV=3 -<br>[ARG28_HUMAN]                                   |
| Q9NZV1 | 1.1510 | 0.2029  | 6.38E-03 | CRIM1 | Cysteine-rich motor neuron 1<br>protein OS=Homo sapiens<br>GN=CRIM1 PE=1 SV=1 -<br>[CRIM1_HUMAN]                                           |
| P49674 | 0.8055 | -0.3120 | 6.42E-03 | KC1E  | Casein kinase I isoform epsilon<br>OS=Homo sapiens GN=CSNK1E<br>PE=1 SV=1 - [KC1E_HUMAN]                                                   |
| P78504 | 0.8427 | -0.2470 | 6.43E-03 | JAG1  | Protein jagged-1 OS=Homo sapiens<br>GN=JAG1 PE=1 SV=3 -<br>[JAG1_HUMAN]                                                                    |
| O95273 | 0.8439 | -0.2449 | 6.62E-03 | CCDB1 | Cyclin-D1-binding protein 1<br>OS=Homo sapiens GN=CCNDBP1<br>PE=1 SV=2 - [CCDB1_HUMAN]                                                     |
| P03915 | 1.1620 | 0.2166  | 6.70E-03 | NU5M  | NADH-ubiquinone oxidoreductase<br>chain 5 OS=Homo sapiens GN=MT-<br>ND5 PE=1 SV=2 - [NU5M_HUMAN]                                           |
| Q8TF72 | 0.7752 | -0.3673 | 6.82E-03 | SHRM3 | Protein Shroom3 OS=Homo<br>sapiens GN=SHROOM3 PE=1 SV=2<br>- [SHRM3_HUMAN]                                                                 |
| O95476 | 1.2895 | 0.3669  | 6.82E-03 | CNEP1 | CTD nuclear envelope phosphatase<br>1 OS=Homo sapiens GN=CTDNEP1<br>PE=1 SV=2 - [CNEP1_HUMAN]                                              |
| Q96PU5 | 0.7786 | -0.3610 | 6.88E-03 | NED4L | E3 ubiquitin-protein ligase NEDD4-<br>like OS=Homo sapiens<br>GN=NEDD4L PE=1 SV=2 -<br>[NED4L_HUMAN]                                       |
| P53611 | 0.8317 | -0.2659 | 6.89E-03 | PGTB2 | Geranylgeranyl transferase type-2<br>subunit beta OS=Homo sapiens                                                                          |

|        |        |         |          |       |                                                                                                                   |
|--------|--------|---------|----------|-------|-------------------------------------------------------------------------------------------------------------------|
|        |        |         |          |       | GN=RABGGTB PE=1 SV=2 -<br>[PGTB2_HUMAN]                                                                           |
| Q03013 | 1.2407 | 0.3111  | 6.94E-03 | GSTM4 | Glutathione S-transferase Mu 4<br>OS=Homo sapiens GN=GSTM4<br>PE=1 SV=3 - [GSTM4_HUMAN]                           |
| O15061 | 1.1953 | 0.2574  | 6.98E-03 | SYNEM | Synemin OS=Homo sapiens<br>GN=SYNM PE=1 SV=2 -<br>[SYNEM_HUMAN]                                                   |
| Q01484 | 0.7708 | -0.3756 | 7.38E-03 | ANK2  | Ankyrin-2 OS=Homo sapiens<br>GN=ANK2 PE=1 SV=4 -<br>[ANK2_HUMAN]                                                  |
| Q9NX00 | 1.1669 | 0.2226  | 7.40E-03 | TM160 | Transmembrane protein 160<br>OS=Homo sapiens GN=TMEM160<br>PE=1 SV=1 - [TM160_HUMAN]                              |
| P22415 | 1.1944 | 0.2563  | 7.67E-03 | USF1  | Upstream stimulatory factor 1<br>OS=Homo sapiens GN=USF1 PE=1<br>SV=1 - [USF1_HUMAN]                              |
| P02768 | 1.5007 | 0.5857  | 7.67E-03 | ALBU  | Serum albumin OS=Homo sapiens<br>GN=ALB PE=1 SV=2 -<br>[ALBU_HUMAN]                                               |
| P01344 | 0.8198 | -0.2867 | 7.85E-03 | IGF2  | Insulin-like growth factor II<br>OS=Homo sapiens GN=IGF2 PE=1<br>SV=1 - [IGF2_HUMAN]                              |
| P49366 | 0.8462 | -0.2409 | 7.95E-03 | DHYS  | Deoxyhypusine synthase OS=Homo<br>sapiens GN=DHPS PE=1 SV=1 -<br>[DHYS_HUMAN]                                     |
| P35914 | 0.7598 | -0.3963 | 8.02E-03 | HMGCL | Hydroxymethylglutaryl-CoA lyase,<br>mitochondrial OS=Homo sapiens<br>GN=HMGCL PE=1 SV=2 -<br>[HMGCL_HUMAN]        |
| P25205 | 0.7732 | -0.3711 | 8.28E-03 | MCM3  | DNA replication licensing factor<br>MCM3 OS=Homo sapiens<br>GN=MCM3 PE=1 SV=3 -<br>[MCM3_HUMAN]                   |
| O60287 | 0.7271 | -0.4597 | 8.41E-03 | NPA1P | Nucleolar pre-ribosomal-<br>associated protein 1 OS=Homo<br>sapiens GN=URB1 PE=1 SV=4 -<br>[NPA1P_HUMAN]          |
| Q8N8Z6 | 0.7744 | -0.3689 | 8.47E-03 | DCBD1 | Discoidin, CUB and LCCL domain-<br>containing protein 1 OS=Homo<br>sapiens GN=DCBLD1 PE=1 SV=2 -<br>[DCBD1_HUMAN] |
| P09038 | 1.1889 | 0.2496  | 9.01E-03 | FGF2  | Fibroblast growth factor 2<br>OS=Homo sapiens GN=FGF2 PE=1<br>SV=3 - [FGF2_HUMAN]                                 |
| P08574 | 1.2189 | 0.2856  | 9.01E-03 | CY1   | Cytochrome c1, heme protein,<br>mitochondrial OS=Homo sapiens<br>GN=CYC1 PE=1 SV=3 -<br>[CY1_HUMAN]               |
| Q8N264 | 0.7404 | -0.4337 | 9.19E-03 | RHG24 | Rho GTPase-activating protein 24<br>OS=Homo sapiens GN=ARHGAP24<br>PE=1 SV=2 - [RHG24_HUMAN]                      |
| Q9Y5G0 | 1.1519 | 0.2040  | 9.24E-03 | PCDGH | Protocadherin gamma-B5<br>OS=Homo sapiens GN=PCDHGB5<br>PE=2 SV=1 - [PCDGH_HUMAN]                                 |
| Q8TCT7 | 1.2757 | 0.3512  | 9.27E-03 | SPP2B | Signal peptide peptidase-like 2B<br>OS=Homo sapiens GN=SPPL2B<br>PE=1 SV=2 - [SPP2B_HUMAN]                        |
| Q9NW13 | 0.8432 | -0.2461 | 9.73E-03 | RBM28 | RNA-binding protein 28 OS=Homo<br>sapiens GN=RBM28 PE=1 SV=3 -<br>[RBM28_HUMAN]                                   |
| Q9NV31 | 0.8261 | -0.2756 | 1.02E-02 | IMP3  | U3 small nucleolar<br>ribonucleoprotein protein IMP3                                                              |



|        |        |         |          |       |                                                                                                                      |
|--------|--------|---------|----------|-------|----------------------------------------------------------------------------------------------------------------------|
|        |        |         |          |       | OS=Homo sapiens GN=IMP3 PE=1 SV=1 - [IMP3_HUMAN]                                                                     |
| Q92633 | 1.3243 | 0.4053  | 1.10E-02 | LPAR1 | Lysophosphatidic acid receptor 1 OS=Homo sapiens GN=LPAR1 PE=1 SV=3 - [LPAR1_HUMAN]                                  |
| P41221 | 0.8245 | -0.2785 | 1.10E-02 | WNT5A | Protein Wnt-5a OS=Homo sapiens GN=WNT5A PE=1 SV=2 - [WNT5A_HUMAN]                                                    |
| Q9Y3B9 | 0.8189 | -0.2882 | 1.12E-02 | RRP15 | RRP15-like protein OS=Homo sapiens GN=RRP15 PE=1 SV=2 - [RRP15_HUMAN]                                                |
| Q96J84 | 1.1521 | 0.2043  | 1.12E-02 | KIRR1 | Kin of IRRE-like protein 1 OS=Homo sapiens GN=KIRREL PE=1 SV=2 - [KIRR1_HUMAN]                                       |
| Q8NBZ7 | 0.7784 | -0.3615 | 1.14E-02 | UXS1  | UDP-glucuronic acid decarboxylase 1 OS=Homo sapiens GN=UXS1 PE=1 SV=1 - [UXS1_HUMAN]                                 |
| Q8NHP6 | 0.8309 | -0.2673 | 1.16E-02 | MSPD2 | Motile sperm domain-containing protein 2 OS=Homo sapiens GN=MOSPD2 PE=1 SV=1 - [MSPD2_HUMAN]                         |
| O95450 | 1.2296 | 0.2981  | 1.16E-02 | ATS2  | A disintegrin and metalloproteinase with thrombospondin motifs 2 OS=Homo sapiens GN=ADAMTS2 PE=2 SV=2 - [ATS2_HUMAN] |
| P78314 | 1.3438 | 0.4263  | 1.18E-02 | 3BP2  | SH3 domain-binding protein 2 OS=Homo sapiens GN=SH3BP2 PE=1 SV=2 - [3BP2_HUMAN]                                      |
| Q8TEB9 | 1.2581 | 0.3312  | 1.19E-02 | RHBL4 | Rhomboid-related protein 4 OS=Homo sapiens GN=RHBDD1 PE=1 SV=1 - [RHBL4_HUMAN]                                       |
| O75147 | 1.1812 | 0.2403  | 1.24E-02 | OBSL1 | Obscurin-like protein 1 OS=Homo sapiens GN=OBSL1 PE=1 SV=4 - [OBSL1_HUMAN]                                           |
| P38571 | 0.8341 | -0.2617 | 1.24E-02 | LICH  | Lysosomal acid lipase/cholesterol ester hydrolase OS=Homo sapiens GN=LIPA PE=1 SV=2 - [LICH_HUMAN]                   |
| Q9ULG6 | 1.2598 | 0.3332  | 1.25E-02 | CCPG1 | Cell cycle progression protein 1 OS=Homo sapiens GN=CCPG1 PE=2 SV=3 - [CCPG1_HUMAN]                                  |
| Q6PID8 | 0.8066 | -0.3101 | 1.26E-02 | KLD10 | Kelch domain-containing protein 10 OS=Homo sapiens GN=KLHDC10 PE=2 SV=1 - [KLD10_HUMAN]                              |
| Q9Y6M7 | 1.1638 | 0.2189  | 1.27E-02 | S4A7  | Sodium bicarbonate cotransporter 3 OS=Homo sapiens GN=SLC4A7 PE=1 SV=2 - [S4A7_HUMAN]                                |
| P51636 | 1.2677 | 0.3423  | 1.32E-02 | CAV2  | Caveolin-2 OS=Homo sapiens GN=CAV2 PE=1 SV=2 - [CAV2_HUMAN]                                                          |
| Q9Y5J1 | 0.7947 | -0.3315 | 1.33E-02 | UTP18 | U3 small nucleolar RNA-associated protein 18 homolog OS=Homo sapiens GN=UTP18 PE=1 SV=3 - [UTP18_HUMAN]              |
| Q9UPU7 | 0.8004 | -0.3211 | 1.33E-02 | TBD2B | TBC1 domain family member 2B OS=Homo sapiens GN=TBC1D2B PE=1 SV=2 - [TBD2B_HUMAN]                                    |
| P13747 | 1.1630 | 0.2178  | 1.35E-02 | HLAE  | HLA class I histocompatibility antigen, alpha chain E OS=Homo sapiens GN=HLA-E PE=1 SV=3 - [HLAE_HUMAN]              |

|        |        |         |          |       |                                                                                                                                      |
|--------|--------|---------|----------|-------|--------------------------------------------------------------------------------------------------------------------------------------|
| P13796 | 1.2054 | 0.2695  | 1.37E-02 | PLSL  | Plastin-2 OS=Homo sapiens<br>GN=LCP1 PE=1 SV=6 -<br>[PLSL_HUMAN]                                                                     |
| Q92845 | 0.8398 | -0.2519 | 1.37E-02 | KIFA3 | Kinesin-associated protein 3<br>OS=Homo sapiens GN=KIFAP3<br>PE=1 SV=2 - [KIFA3_HUMAN]                                               |
| Q9UNN8 | 1.3733 | 0.4576  | 1.37E-02 | EPCR  | Endothelial protein C receptor<br>OS=Homo sapiens GN=PROCR<br>PE=1 SV=1 - [EPCR_HUMAN]                                               |
| O95757 | 0.8510 | -0.2327 | 1.38E-02 | HS74L | Heat shock 70 kDa protein 4L<br>OS=Homo sapiens GN=HSPA4L<br>PE=1 SV=3 - [HS74L_HUMAN]                                               |
| P09914 | 0.7241 | -0.4658 | 1.40E-02 | IFIT1 | Interferon-induced protein with<br>tetratricopeptide repeats 1<br>OS=Homo sapiens GN=IFIT1 PE=1<br>SV=2 - [IFIT1_HUMAN]              |
| P27169 | 1.4525 | 0.5385  | 1.41E-02 | PON1  | Serum paraoxonase/arylesterase 1<br>OS=Homo sapiens GN=PON1 PE=1<br>SV=3 - [PON1_HUMAN]                                              |
| Q9UBK8 | 0.8283 | -0.2718 | 1.43E-02 | MTRR  | Methionine synthase reductase<br>OS=Homo sapiens GN=MTRR PE=1<br>SV=3 - [MTRR_HUMAN]                                                 |
| Q8TDW7 | 0.8334 | -0.2629 | 1.43E-02 | FAT3  | Protocadherin Fat 3 OS=Homo<br>sapiens GN=FAT3 PE=2 SV=2 -<br>[FAT3_HUMAN]                                                           |
| O75380 | 1.1932 | 0.2548  | 1.47E-02 | NDUS6 | NADH dehydrogenase<br>[ubiquinone] iron-sulfur protein 6,<br>mitochondrial OS=Homo sapiens<br>GN=NDUFS6 PE=1 SV=1 -<br>[NDUS6_HUMAN] |
| Q9H0X4 | 1.2316 | 0.3006  | 1.49E-02 | ITFG3 | Protein ITFG3 OS=Homo sapiens<br>GN=ITFG3 PE=1 SV=1 -<br>[ITFG3_HUMAN]                                                               |
| O60220 | 1.2119 | 0.2773  | 1.53E-02 | TIM8A | Mitochondrial import inner<br>membrane translocase subunit<br>Tim8 A OS=Homo sapiens<br>GN=TIMM8A PE=1 SV=1 -<br>[TIM8A_HUMAN]       |
| Q5QJE6 | 0.8384 | -0.2543 | 1.58E-02 | TDIF2 | Deoxynucleotidyltransferase<br>terminal-interacting protein 2<br>OS=Homo sapiens GN=DNTTIP2<br>PE=1 SV=2 - [TDIF2_HUMAN]             |
| Q6P1Q9 | 0.8049 | -0.3131 | 1.62E-02 | MET2B | Methyltransferase-like protein 2B<br>OS=Homo sapiens GN=METTL2B<br>PE=1 SV=3 - [MET2B_HUMAN]                                         |
| Q9ULP9 | 1.2202 | 0.2871  | 1.62E-02 | TBC24 | TBC1 domain family member 24<br>OS=Homo sapiens GN=TBC1D24<br>PE=1 SV=2 - [TBC24_HUMAN]                                              |
| Q99424 | 1.1562 | 0.2094  | 1.62E-02 | ACOX2 | Peroxisomal acyl-coenzyme A<br>oxidase 2 OS=Homo sapiens<br>GN=ACOX2 PE=1 SV=1 -<br>[ACOX2_HUMAN]                                    |
| Q8WUH6 | 0.8415 | -0.2490 | 1.71E-02 | CL023 | UPF0444 transmembrane protein<br>C12orf23 OS=Homo sapiens<br>GN=C12orf23 PE=1 SV=1 -<br>[CL023_HUMAN]                                |
| Q9NQ92 | 0.8164 | -0.2927 | 1.73E-02 | COPRS | Coordinator of PRMT5 and<br>differentiation stimulator<br>OS=Homo sapiens GN=COPRS PE=1<br>SV=3 - [COPRS_HUMAN]                      |
| Q9BRS2 | 0.8501 | -0.2343 | 1.80E-02 | RIOK1 | Serine/threonine-protein kinase<br>RIO1 OS=Homo sapiens GN=RIOK1<br>PE=1 SV=2 - [RIOK1_HUMAN]                                        |

|        |        |         |          |       |                                                                                                                         |
|--------|--------|---------|----------|-------|-------------------------------------------------------------------------------------------------------------------------|
| 075061 | 0.8355 | -0.2593 | 1.81E-02 | AUX1  | Putative tyrosine-protein phosphatase auxilin OS=Homo sapiens GN=DNAJC6 PE=1 SV=3 - [AUX1_HUMAN]                        |
| 075420 | 1.2596 | 0.3329  | 1.82E-02 | PERQ1 | PERQ amino acid-rich with GYF domain-containing protein 1 OS=Homo sapiens GN=GIGYF1 PE=1 SV=2 - [PERQ1_HUMAN]           |
| P04921 | 0.8490 | -0.2362 | 1.84E-02 | GLPC  | Glycophorin-C OS=Homo sapiens GN=GYPC PE=1 SV=1 - [GLPC_HUMAN]                                                          |
| Q9UFF9 | 0.7750 | -0.3677 | 1.90E-02 | CNOT8 | CCR4-NOT transcription complex subunit 8 OS=Homo sapiens GN=CNOT8 PE=1 SV=1 - [CNOT8_HUMAN]                             |
| P02788 | 1.1932 | 0.2548  | 1.91E-02 | TRFL  | Lactotransferrin OS=Homo sapiens GN=LTF PE=1 SV=6 - [TRFL_HUMAN]                                                        |
| O15213 | 0.8041 | -0.3146 | 1.93E-02 | WDR46 | WD repeat-containing protein 46 OS=Homo sapiens GN=WDR46 PE=1 SV=3 - [WDR46_HUMAN]                                      |
| Q15059 | 1.2099 | 0.2749  | 1.99E-02 | BRD3  | Bromodomain-containing protein 3 OS=Homo sapiens GN=BRD3 PE=1 SV=1 - [BRD3_HUMAN]                                       |
| Q4G0N4 | 1.2679 | 0.3425  | 2.01E-02 | NAKD2 | NAD kinase 2, mitochondrial OS=Homo sapiens GN=NAKD2 PE=1 SV=2 - [NAKD2_HUMAN]                                          |
| Q9UN70 | 0.7879 | -0.3439 | 2.02E-02 | PCDGK | Protocadherin gamma-C3 OS=Homo sapiens GN=PCDHGC3 PE=1 SV=1 - [PCDGK_HUMAN]                                             |
| Q9NP58 | 1.2197 | 0.2865  | 2.06E-02 | ABCB6 | ATP-binding cassette sub-family B member 6, mitochondrial OS=Homo sapiens GN=ABCB6 PE=1 SV=1 - [ABCB6_HUMAN]            |
| Q12891 | 1.1844 | 0.2441  | 2.07E-02 | HYAL2 | Hyaluronidase-2 OS=Homo sapiens GN=HYAL2 PE=1 SV=4 - [HYAL2_HUMAN]                                                      |
| P58397 | 0.8412 | -0.2494 | 2.15E-02 | ATS12 | A disintegrin and metalloproteinase with thrombospondin motifs 12 OS=Homo sapiens GN=ADAMTS12 PE=1 SV=2 - [ATS12_HUMAN] |
| 075746 | 1.1804 | 0.2393  | 2.15E-02 | CMC1  | Calcium-binding mitochondrial carrier protein Aralar1 OS=Homo sapiens GN=SLC25A12 PE=1 SV=2 - [CMC1_HUMAN]              |
| Q9Y5R8 | 1.2205 | 0.2875  | 2.20E-02 | TPPC1 | Trafficking protein particle complex subunit 1 OS=Homo sapiens GN=TRAPPC1 PE=1 SV=1 - [TPPC1_HUMAN]                     |
| Q7Z6K3 | 0.8496 | -0.2351 | 2.26E-02 | PTAR1 | Protein prenyltransferase alpha subunit repeat-containing protein 1 OS=Homo sapiens GN=PTAR1 PE=2 SV=2 - [PTAR1_HUMAN]  |
| P09234 | 1.2230 | 0.2905  | 2.32E-02 | RU1C  | U1 small nuclear ribonucleoprotein C OS=Homo sapiens GN=SNRPC PE=1 SV=1 - [RU1C_HUMAN]                                  |
| P51805 | 1.1944 | 0.2563  | 2.45E-02 | PLXA3 | Plexin-A3 OS=Homo sapiens GN=PLXNA3 PE=1 SV=2 - [PLXA3_HUMAN]                                                           |
| Q15291 | 1.4857 | 0.5712  | 2.50E-02 | RBBP5 | Retinoblastoma-binding protein 5 OS=Homo sapiens GN=RBBP5 PE=1 SV=2 - [RBBP5_HUMAN]                                     |

|        |        |         |          |       |                                                                                                                |
|--------|--------|---------|----------|-------|----------------------------------------------------------------------------------------------------------------|
| Q12983 | 0.8118 | -0.3008 | 2.50E-02 | BNIP3 | BCL2/adenovirus E1B 19 kDa protein-interacting protein 3<br>OS=Homo sapiens GN=BNIP3 PE=1 SV=2 - [BNIP3_HUMAN] |
| Q9HAU4 | 0.8248 | -0.2778 | 2.57E-02 | SMUF2 | E3 ubiquitin-protein ligase SMURF2 OS=Homo sapiens GN=SMURF2 PE=1 SV=1 - [SMUF2_HUMAN]                         |
| Q15025 | 0.8179 | -0.2900 | 2.65E-02 | TNIP1 | TNFAIP3-interacting protein 1 OS=Homo sapiens GN=TNIP1 PE=1 SV=2 - [TNIP1_HUMAN]                               |
| P02774 | 1.2988 | 0.3772  | 2.72E-02 | VTDB  | Vitamin D-binding protein OS=Homo sapiens GN=GC PE=1 SV=1 - [VTDB_HUMAN]                                       |
| Q9Y4H2 | 1.3380 | 0.4201  | 2.74E-02 | IRS2  | Insulin receptor substrate 2 OS=Homo sapiens GN=IRS2 PE=1 SV=2 - [IRS2_HUMAN]                                  |
| P15408 | 0.8206 | -0.2853 | 2.75E-02 | FOSL2 | Fos-related antigen 2 OS=Homo sapiens GN=FOSL2 PE=1 SV=1 - [FOSL2_HUMAN]                                       |
| Q5TBB1 | 0.8110 | -0.3022 | 2.78E-02 | RNH2B | Ribonuclease H2 subunit B OS=Homo sapiens GN=RNASEH2B PE=1 SV=1 - [RNH2B_HUMAN]                                |
| Q96FX8 | 0.7054 | -0.5035 | 2.84E-02 | PERP  | p53 apoptosis effector related to PMP-22 OS=Homo sapiens GN=PERP PE=2 SV=1 - [PERP_HUMAN]                      |
| P21731 | 1.2946 | 0.3725  | 2.93E-02 | TA2R  | Thromboxane A2 receptor OS=Homo sapiens GN=TBXA2R PE=1 SV=3 - [TA2R_HUMAN]                                     |
| P17405 | 1.1657 | 0.2212  | 3.01E-02 | ASM   | Sphingomyelin phosphodiesterase OS=Homo sapiens GN=SMPD1 PE=1 SV=4 - [ASM_HUMAN]                               |
| P05165 | 1.3033 | 0.3822  | 3.03E-02 | PCCA  | Propionyl-CoA carboxylase alpha chain, mitochondrial OS=Homo sapiens GN=PCCA PE=1 SV=4 - [PCCA_HUMAN]          |
| Q9BVG3 | 0.6984 | -0.5178 | 3.07E-02 | TRI62 | Tripartite motif-containing protein 62 OS=Homo sapiens GN=TRIM62 PE=2 SV=1 - [TRI62_HUMAN]                     |
| Q9Y618 | 0.8026 | -0.3173 | 3.11E-02 | NCOR2 | Nuclear receptor corepressor 2 OS=Homo sapiens GN=NCOR2 PE=1 SV=2 - [NCOR2_HUMAN]                              |
| Q13572 | 0.8322 | -0.2649 | 3.28E-02 | ITPK1 | Inositol-tetrakisphosphate 1-kinase OS=Homo sapiens GN=ITPK1 PE=1 SV=2 - [ITPK1_HUMAN]                         |
| P50607 | 1.2113 | 0.2765  | 3.33E-02 | TUB   | Tubby protein homolog OS=Homo sapiens GN=TUB PE=1 SV=1 - [TUB_HUMAN]                                           |
| O60292 | 0.8207 | -0.2851 | 3.37E-02 | SI1L3 | Signal-induced proliferation-associated 1-like protein 3 OS=Homo sapiens GN=SIPA1L3 PE=1 SV=3 - [SI1L3_HUMAN]  |
| Q96A19 | 1.1962 | 0.2584  | 3.45E-02 | C102A | Coiled-coil domain-containing protein 102A OS=Homo sapiens GN=CCDC102A PE=1 SV=2 - [C102A_HUMAN]               |
| Q96S19 | 0.8493 | -0.2356 | 3.47E-02 | CP013 | UPF0585 protein C16orf13 OS=Homo sapiens GN=C16orf13 PE=1 SV=2 - [CP013_HUMAN]                                 |
| Q14678 | 1.1957 | 0.2578  | 3.52E-02 | KANK1 | KN motif and ankyrin repeat domain-containing protein 1                                                        |

|        |        |         |          |       |                                                                                                                     |
|--------|--------|---------|----------|-------|---------------------------------------------------------------------------------------------------------------------|
|        |        |         |          |       | OS=Homo sapiens GN=KANK1<br>PE=1 SV=3 - [KANK1_HUMAN]                                                               |
| Q8IY63 | 0.7723 | -0.3728 | 3.54E-02 | AMOL1 | Angiotensin-like protein 1<br>OS=Homo sapiens GN=AMOTL1<br>PE=1 SV=1 - [AMOL1_HUMAN]                                |
| Q92793 | 1.2024 | 0.2659  | 3.54E-02 | CBP   | CREB-binding protein OS=Homo<br>sapiens GN=CREBBP PE=1 SV=3 -<br>[CBP_HUMAN]                                        |
| P14543 | 1.1776 | 0.2359  | 3.68E-02 | NID1  | Nidogen-1 OS=Homo sapiens<br>GN=NID1 PE=1 SV=3 -<br>[NID1_HUMAN]                                                    |
| Q9NRQ2 | 1.1580 | 0.2117  | 3.72E-02 | PLS4  | Phospholipid scramblase 4<br>OS=Homo sapiens GN=PLSCR4<br>PE=1 SV=2 - [PLS4_HUMAN]                                  |
| Q8NI35 | 1.3989 | 0.4843  | 3.87E-02 | INADL | InaD-like protein OS=Homo<br>sapiens GN=INADL PE=1 SV=3 -<br>[INADL_HUMAN]                                          |
| Q7Z6J0 | 0.8352 | -0.2598 | 3.89E-02 | SH3R1 | E3 ubiquitin-protein ligase SH3RF1<br>OS=Homo sapiens GN=SH3RF1<br>PE=1 SV=2 - [SH3R1_HUMAN]                        |
| P51784 | 0.7343 | -0.4456 | 3.89E-02 | UBP11 | Ubiquitin carboxyl-terminal<br>hydrolase 11 OS=Homo sapiens<br>GN=USP11 PE=1 SV=3 -<br>[UBP11_HUMAN]                |
| Q9UPY5 | 1.2886 | 0.3658  | 4.03E-02 | XCT   | Cystine/glutamate transporter<br>OS=Homo sapiens GN=SLC7A11<br>PE=1 SV=1 - [XCT_HUMAN]                              |
| P26358 | 0.7605 | -0.3949 | 4.04E-02 | DNMT1 | DNA (cytosine-5)-<br>methyltransferase 1 OS=Homo<br>sapiens GN=DNMT1 PE=1 SV=2 -<br>[DNMT1_HUMAN]                   |
| P06732 | 1.4730 | 0.5588  | 4.36E-02 | KCRM  | Creatine kinase M-type OS=Homo<br>sapiens GN=CKM PE=1 SV=2 -<br>[KCRM_HUMAN]                                        |
| Q9BSW2 | 0.8325 | -0.2645 | 4.37E-02 | EFC4B | EF-hand calcium-binding domain-<br>containing protein 4B OS=Homo<br>sapiens GN=EFCAB4B PE=1 SV=1 -<br>[EFC4B_HUMAN] |
| P06400 | 0.8262 | -0.2754 | 4.37E-02 | RB    | Retinoblastoma-associated protein<br>OS=Homo sapiens GN=RB1 PE=1<br>SV=2 - [RB_HUMAN]                               |
| Q8TEW0 | 1.1753 | 0.2330  | 4.57E-02 | PARD3 | Partitioning defective 3 homolog<br>OS=Homo sapiens GN=PARD3<br>PE=1 SV=2 - [PARD3_HUMAN]                           |
| Q9UPN9 | 1.2435 | 0.3144  | 4.66E-02 | TRI33 | E3 ubiquitin-protein ligase TRIM33<br>OS=Homo sapiens GN=TRIM33<br>PE=1 SV=3 - [TRI33_HUMAN]                        |
| Q9BWW4 | 1.4414 | 0.5274  | 4.68E-02 | SSBP3 | Single-stranded DNA-binding<br>protein 3 OS=Homo sapiens<br>GN=SSBP3 PE=1 SV=1 -<br>[SSBP3_HUMAN]                   |
| Q8N514 | 1.1876 | 0.2481  | 4.84E-02 | DHRX  | Dehydrogenase/reductase SDR<br>family member on chromosome X<br>OS=Homo sapiens GN=DHRX<br>PE=2 SV=2 - [DHRX_HUMAN] |
| O60925 | 1.2340 | 0.3034  | 4.89E-02 | PFD1  | Prefoldin subunit 1 OS=Homo<br>sapiens GN=PFDN1 PE=1 SV=2 -<br>[PFD1_HUMAN]                                         |

**Supplemental Table 4:** List of regulated genes and proteins in the common regulated pathways from microarray and proteomic analysis. Common transcriptional regulators (transcripts or proteins) in each pathway are underlined.

| Ingenuity Canonical Pathways                        | Dataset | Transcripts/proteins                                                                                                                                                                                                                                      |
|-----------------------------------------------------|---------|-----------------------------------------------------------------------------------------------------------------------------------------------------------------------------------------------------------------------------------------------------------|
| Acute Phase Response Signaling                      | Array   | <u>IUN</u> , <u>C3</u> , IL1B, SOCS3, TNFRSF1B, MRAS, IL6R, RBP4, NFKBIA, <u>PLG</u> , <u>A2M</u> , AGT, FN1, HRG, CEBPB, SERPINA1, SERPINE1, RBP5, TTR,                                                                                                  |
|                                                     | Cell MS | <u>IUN</u> , FTL, TF, <u>C3</u> , CRABP2, <u>PLG</u> , <u>A2M</u> , C4A/C4B, HP, SERPINF2, C9, AMBP, ITIH2, ALB, ITIH4, FGA, HMOX1, OSMR, SOD2, NOLC1, CEBPB, APOA1, C4BPA, SERPINE1, HPX, AHSG, SERPING1, SERPIND1                                       |
| Agrin Interactions at Neuromuscular Junction        | Array   | <u>IUN</u> , MRAS, NRG3, ITGB2, ACTA2, <u>RAC2</u> , LAMA2                                                                                                                                                                                                |
|                                                     | Cell MS | <u>IUN</u> , ITGA2, LAMB1, AGRN, ITGB3, <u>RAC2</u> , DAG1                                                                                                                                                                                                |
| Aryl Hydrocarbon Receptor Signaling                 | Array   | <u>IUN</u> , MYC, ALDH1L1, IL1B, <u>CCND1</u> , CDKN1A, ALDH6A1, GSTA1, <u>MGST1</u> , ALDH8A1                                                                                                                                                            |
|                                                     | Cell MS | <u>IUN</u> , NCOR2, MCM7, CDK2, CDKN2A, TGFB2, NQO1, <u>MGST1</u> , NFIC, HSPB1, <u>CCND1</u> , GSTM2, GSTM4, ALDH1B1, RB1, CTSD                                                                                                                          |
| Atherosclerosis Signaling                           | Array   | S100A8, IL1B, <u>APOD</u> , COL3A1, COL1A2, ITGB2, RBP4, APOM, PLA2G4C, LYZ, PNPLA3, LPL, SERPINA1, TNFRSF12A                                                                                                                                             |
|                                                     | Cell MS | PON1, LPA, CXCL12, APOB, CLU, <u>APOD</u> , APOA1, PCYOX1, APOE, APOL1, ALB, PDGFC                                                                                                                                                                        |
| Caveolar-mediated Endocytosis Signaling             | Array   | ITGAM, EGF, CD48, ITGAX, ITGB2, ACTA2, PTPN1                                                                                                                                                                                                              |
|                                                     | Cell MS | ITGB5, ITGAV, ITGA2, ITGA11, ITGB3, ALB                                                                                                                                                                                                                   |
| Clathrin-mediated Endocytosis Signaling             | Array   | LDLRAP1, S100A8, <u>APOD</u> , UBD, PGF, ITGB2, ACTA2, RBP4, DNMT1, APOM, LYZ, EGF, SERPINA1, VEGFC                                                                                                                                                       |
|                                                     | Cell MS | PON1, TF, ITGB5, <u>APOD</u> , PCYOX1, FGF2, EPHB2, PPP3CA, PDGFC, ARRB1, LPA, APOB, CLU, APOA1, SH3BP4, ITGB3, APOE, SYNJ1, APOL1, ALB                                                                                                                   |
| Coagulation System                                  | Array   | <u>A2M</u> , SERPINA1, F13A1, <u>SERPINE1</u> , <u>PLG</u>                                                                                                                                                                                                |
|                                                     | Cell MS | <u>A2M</u> , F12, KNG1, SERPINF2, FGA, <u>SERPINE1</u> , <u>PLG</u> , SERPIND1                                                                                                                                                                            |
| Complement System                                   | Array   | ITGAM, <u>C3</u> , C7, ITGAX, ITGB2, C3AR1                                                                                                                                                                                                                |
|                                                     | Cell MS | C4A/C4B, <u>C3</u> , C4BPA, C9, SERPING1                                                                                                                                                                                                                  |
| FXR/RXR Activation                                  | Array   | <u>PCK2</u> , <u>C3</u> , IL1B, <u>APOD</u> , RBP4, APOM, SDC1, AGT, PPARGC1A, LPL, SERPINA1, FBP1, TTR                                                                                                                                                   |
|                                                     | Cell MS | GC, TF, <u>C3</u> , C4A/C4B, KNG1, SERPINF2, CREBBP, C9, AMBP, APOL1, ALB, PON1, <u>PCK2</u> , ITIH4, <u>APOD</u> , PCYOX1, FGA, APOB, VTN, CLU, FETUB, APOA1, APOE, HPX, AHSG, PLTP                                                                      |
| Glioma Invasiveness Signaling                       | Array   | MMP2, RHOB, MRAS, <u>PLG</u> , RND3, RHOU, CD44                                                                                                                                                                                                           |
|                                                     | Cell MS | VTN, ITGB5, ITGAV, ITGB3, <u>PLG</u> , FNBP1                                                                                                                                                                                                              |
| Glutathione Redox Reactions I                       | Array   | CLIC2, GPX3, <u>MGST1</u>                                                                                                                                                                                                                                 |
|                                                     | Cell MS | GPX4, GSR, GPX7, GPX1, <u>MGST1</u>                                                                                                                                                                                                                       |
| Glutathione-mediated Detoxification                 | Array   | GGH, <u>ANPEP</u> , GSTA1, <u>MGST1</u> , NAT8                                                                                                                                                                                                            |
|                                                     | Cell MS | GSTM2, GSTM4, <u>ANPEP</u> , <u>MGST1</u>                                                                                                                                                                                                                 |
| Hepatic Fibrosis / Hepatic Stellate Cell Activation | Array   | CXCL9, EDNRA, MMP2, PGF, IL6R, ACTA2, AGTR1, IL10RA, <u>A2M</u> , CCR5, <u>COL12A1</u> , FN1, SMAD7, VEGFC, COL4A1, BAMBI, IL1B, KLF6, PDGFRA, TNFRSF1B, CD14, COL3A1, COL1A2, COL5A1, AGT, EGF, COL16A1, <u>COL5A2</u> , <u>COL4A2</u> , <u>SERPINE1</u> |
|                                                     | Cell MS | COL7A1, COL6A3, TGFB2, FGF2, COL8A1, IGF2, PDGFC, <u>A2M</u> , <u>COL12A1</u> , <u>COL5A2</u> , SMAD3, ECE1, IGFBP3, <u>SERPINE1</u>                                                                                                                      |

|                                                                       |         |                                                                                                                                                                                                 |
|-----------------------------------------------------------------------|---------|-------------------------------------------------------------------------------------------------------------------------------------------------------------------------------------------------|
| IL-12 Signaling and Production in Macrophages                         | Array   | <u>IUN</u> , LYZ, S100A8, IRF8, <u>APOD</u> , <u>CEBPB</u> , SERPINA1, RBP4, TLR2, APOM, IL12RB1                                                                                                |
|                                                                       | Cell MS | PON1, <u>IUN</u> , <u>APOD</u> , TGFB2, PCYOX1, LPA, APOB, CLU, <u>CEBPB</u> , APOA1, APOE, APOL1, ALB                                                                                          |
| IL-8 Signaling                                                        | Array   | <u>IUN</u> , HBEGF, ITGAM, MMP2, GNG11, MRAS, PGF, ITGAX, NOX4, ITGB2, <u>RAC2</u> , EGF, PLD6, <u>CCND1</u> , RHOB, VEGFC, RND3, RHOU                                                          |
|                                                                       | Cell MS | GNAI1, <u>IUN</u> , ITGB5, ITGAV, GNG10, <u>RAC2</u> , HMOX1, PDGFC, GNG5, <u>CCND1</u> , ITGB3, BCL2L1, FNBP1                                                                                  |
| Inhibition of Matrix Metalloproteases                                 | Array   | MMP7, <u>A2M</u> , MMP2, <u>THBS2</u> , TFPI2, SDC1                                                                                                                                             |
|                                                                       | Cell MS | <u>A2M</u> , RECK, <u>THBS2</u> , SDC2                                                                                                                                                          |
| LXR/RXR Activation                                                    | Array   | S100A8, <u>C3</u> , IL1B, CD14, TNFRSF1B, <u>APOD</u> , HADH, RBP4, APOM, AGT, LYZ, ARG2, LPL, SERPINA1, TTR                                                                                    |
|                                                                       | Cell MS | GC, NCOR2, TF, <u>C3</u> , HMGCR, LPA, C4A/C4B, SCD, KNG1, SERPINF2, C9, AMBP, APOL1, ALB, PON1, ITIH4, <u>APOD</u> , PCYOX1, FGA, FDFT1, APOB, VTN, CLU, CYP51A1, APOA1, APOE, HPX, AHSG, PLTP |
| Methylglyoxal Degradation III                                         | Array   | AKR7A3, <u>AKR1C3</u> , FAM213B, <u>AKR1C1/AKR1C2</u>                                                                                                                                           |
|                                                                       | Cell MS | <u>AKR1C3</u> , AKR1B1, AKR1B10, <u>AKR1C1/AKR1C2</u>                                                                                                                                           |
| NRF2-mediated Oxidative Stress Response                               | Array   | <u>IUN</u> , DNAJB1, MRAS, HSPB8, FMO1, ACTA2, <u>MGST1</u> , MAFF, AKR7A3, JUND, FKBP5, AOX1, DNAJB4, GSTA1, <u>IUNB</u>                                                                       |
|                                                                       | Cell MS | <u>IUN</u> , DNAJC6, GCLC, FTL, TXN, SOD1, TXNRD1, NQO1, <u>MGST1</u> , PRDX1, HMOX1, ENC1, SOD2, GSR, GSTM2, GSTM4, CREBBP, EPHX1, GCLM, FTH1, <u>IUNB</u>                                     |
| Production of Nitric Oxide and Reactive Oxygen Species in Macrophages | Array   | <u>IUN</u> , PPP1R14A, S100A8, TNFRSF1B, <u>APOD</u> , RBP4, NFKBIA, APOM, LYZ, IRF8, PPP1R10, PPP1R3C, RHOB, ARG2, SERPINA1, TLR2, RND3, RHOU                                                  |
|                                                                       | Cell MS | PON1, <u>IUN</u> , <u>APOD</u> , PCYOX1, LPA, APOB, CLU, APOA1, CREBBP, APOE, SIRPA, APOL1, ALB, FNBP1                                                                                          |
| Superpathway of Citrulline Metabolism                                 | Array   | <u>ASS1</u> , ARG2, NOS3                                                                                                                                                                        |
|                                                                       | Cell MS | OAT, <u>ASS1</u> , GLS                                                                                                                                                                          |
| $\gamma$ -glutamyl Cycle                                              | Array   | GGT5, <u>ANPEP</u> , GGA2                                                                                                                                                                       |
|                                                                       | Cell MS | GCLC, <u>ANPEP</u> , GCLM                                                                                                                                                                       |
